# Supplementary material for: Seepage Deformation and Failure of Rock Mass Under High Water Pressure With a Discrete Element Method
Source: Frontiers journal article supplement (doi:10.3389/fphy.2022.857158), 2022-04-12
Supplement: Table_1.XLSX [file Table_1.XLSX]

## Sheet: Sheet1
time/s	A	B	C	D	E	F	G
0.000733334	1000000	0	0	0	0	0	0
0.00406667	1000000	0	0	0	0	0	0
0.0074	1000000	0	0	0	0	0	0
0.0107333	1000000	0	0	0	0	0	0
0.0140667	1000000	0	0	0	0	0	0
0.0174	1000000	30.2619	0	0	0	0	0
0.0207333	1000000	307.204	0	0	0	0	0
0.0240667	1000000	992.776	0	0	0	0	0
0.0274	1000000	2183.84	0	0	0	0	0
0.0307333	1000000	3906.31	0	0	0	0	0
0.0340667	1000000	6171.24	0	0	0	0	0
0.0374	1000000	8943.67	0	0	0	0	0
0.0407333	1000000	12178.5	0	0	0	0	0
0.0440667	1000000	15846.7	1.77687e-06	0	0	0	0
0.0474	1000000	19887.5	5.15622e-05	0	0	0	0
0.0507334	1000000	24254.6	0.000393963	0	0	0	0
0.0540667	1000000	28912.3	0.00183045	0	0	0	0
0.0574	1000000	33810.2	0.00636956	0	0	0	0
0.0607334	1000000	38915.4	0.018217	0	0	0	0
0.0640667	1000000	44194.5	0.0451205	5.41545e-11	0	0	0
0.0674	1000000	49611.9	0.100043	1.28846e-09	0	0	0
0.0707334	1000000	55145.6	0.203045	1.21237e-08	0	0	0
0.0740667	1000000	60769.3	0.383347	7.24187e-08	0	0	0
0.0774	1000000	66460	0.681413	3.24455e-07	0	0	0
0.0807334	1000000	72200.4	1.15091	1.18548e-06	0	0	0
0.0840667	1000000	77973.1	1.86058	3.71238e-06	0	0	0
0.0874	1000000	83763.3	2.89575	1.02918e-05	0	0	0
0.0907334	1000000	89559.4	4.35957	2.58393e-05	1.81446e-18	0	0
0.0940667	1000000	95349.9	6.37392	5.97369e-05	5.74726e-17	0	0
0.0974	1000000	101125	9.07982	0.000128781	9.71206e-16	0	0
0.100733	1000000	106878	12.6376	0.000261451	1.00824e-14	0	0
0.104067	1000000	112601	17.2266	0.000503825	7.39463e-14	0	0
0.1074	1000000	118288	23.0446	0.000927456	4.20214e-13	0	0
0.110733	1000000	123933	30.3067	0.00163955	1.96406e-12	1.08379e-25	0
0.114067	1000000	129531	39.2446	0.00279571	7.8608e-12	5.30438e-24	0
0.1174	1000000	135080	50.1046	0.00461546	2.77187e-11	1.02043e-22	0
0.120733	1000000	140576	63.1465	0.00740076	8.79355e-11	1.21025e-21	0
0.124067	1000000	146016	78.6418	0.0115576	2.55005e-10	1.04952e-20	0
0.1274	1000000	151398	96.8716	0.0176208	6.84415e-10	7.26799e-20	0
0.130733	1000000	156720	118.125	0.0262814	1.71703e-09	4.23402e-19	2.54768e-30
0.134067	1000000	161981	142.698	0.0384178	4.05903e-09	2.14482e-18	7.09482e-29
0.1374	1000000	167179	170.89	0.0551289	9.10207e-09	9.66134e-18	1.03219e-27
0.140733	1000000	172313	203.003	0.0777696	1.94692e-08	3.93218e-17	1.04527e-26
0.144067	1000000	177384	239.341	0.107989	3.99108e-08	1.46361e-16	8.27678e-26
0.1474	1000000	182390	280.205	0.14777	7.87258e-08	5.0302e-16	5.45514e-25
0.150733	1000000	187333	325.896	0.199471	1.49947e-07	1.609e-15	3.11022e-24
0.154067	1000000	192211	376.71	0.265864	2.76607e-07	4.82244e-15	1.57403e-23
0.1574	1000000	197025	432.938	0.350183	4.955e-07	1.36224e-14	7.20096e-23
0.160733	1000000	201774	494.863	0.456158	8.63949e-07	3.6453e-14	3.01839e-22
0.164067	1000000	206458	562.764	0.588064	1.46925e-06	9.2826e-14	1.17121e-21
0.1674	1000000	211078	636.909	0.750757	2.44153e-06	2.25842e-13	4.24115e-21
0.170733	1000000	215636	717.558	0.949711	3.97102e-06	5.26856e-13	1.44264e-20
0.174067	1000000	220131	804.96	1.19106	6.33079e-06	1.18228e-12	4.63458e-20
0.1774	1000000	224564	899.354	1.48163	9.90622e-06	2.5594e-12	1.41261e-19
0.180733	1000000	228934	1000.97	1.82897	1.52327e-05	5.3588e-12	4.1012e-19
0.184067	1000000	233245	1110.02	2.24139	2.3043e-05	1.08773e-11	1.13808e-18
0.1874	1000000	237496	1226.71	2.72795	3.43265e-05	2.14494e-11	3.0279e-18
0.190733	1000000	241689	1351.23	3.29855	5.04015e-05	4.117e-11	7.74482e-18
0.194067	1000000	245824	1483.76	3.9639	7.30037e-05	7.70501e-11	1.90925e-17
0.1974	1000000	249902	1624.47	4.73552	0.000104392	1.40825e-10	4.54657e-17
0.200733	1000000	253924	1773.52	5.62581	0.000147474	2.51727e-10	1.04802e-16
0.204067	1000000	257891	1931.04	6.64801	0.000205956	4.40656e-10	2.34291e-16
0.2074	1000000	261803	2097.17	7.81622	0.000284517	7.56336e-10	5.08859e-16
0.210733	1000000	265663	2272.02	9.14542	0.000389006	1.27427e-09	1.07548e-15
0.214067	1000000	269469	2455.7	10.6514	0.000526678	2.10953e-09	2.21524e-15
0.2174	1000000	273224	2648.31	12.3509	0.000706457	3.43479e-09	4.45305e-15
0.220733	1000000	276928	2849.92	14.2613	0.000939229	5.50536e-09	8.74729e-15
0.224067	1000000	280582	3060.61	16.4011	0.00123819	8.69354e-09	1.68108e-14
0.2274	1000000	284187	3280.44	18.7894	0.00161919	1.3535e-08	3.16438e-14
0.230733	1000000	287744	3509.45	21.4461	0.00210121	2.07912e-08	5.84018e-14
0.234067	1000000	291254	3747.7	24.3919	0.00270674	3.15311e-08	1.05784e-13
0.2374	1000000	294717	3995.2	27.6484	0.00346235	4.72393e-08	1.88221e-13
0.240733	1000000	298135	4251.97	31.2376	0.0043992	6.99551e-08	3.29257e-13
0.244067	1000000	301508	4518.03	35.1825	0.00555366	1.02451e-07	5.66715e-13
0.2474	1000000	304838	4793.38	39.5065	0.00696792	1.48461e-07	9.60465e-13
0.250733	1000000	308124	5078.02	44.2339	0.00869073	2.12965e-07	1.60394e-12
0.254067	1000000	311368	5371.92	49.3893	0.0107781	3.02549e-07	2.64098e-12
0.2574	1000000	314570	5675.06	54.9981	0.0132941	4.25846e-07	4.29026e-12
0.260733	1000000	317732	5987.42	61.086	0.0163116	5.94082e-07	6.88006e-12
0.264067	1000000	320853	6308.96	67.6795	0.0199135	8.21744e-07	1.08975e-11
0.2674	1000000	323936	6639.64	74.8051	0.0241931	1.12738e-06	1.70574e-11
0.270733	1000000	326979	6979.4	82.4901	0.0292556	1.53459e-06	2.63972e-11
0.274067	1000000	329985	7328.19	90.762	0.0352186	2.07317e-06	4.04073e-11
0.2774	1000000	332954	7685.96	99.6486	0.0422138	2.78049e-06	6.12079e-11
0.280733	1000000	335886	8052.63	109.178	0.0503875	3.70317e-06	9.1786e-11
0.284067	1000000	338782	8428.13	119.379	0.0599019	4.89895e-06	1.36313e-10
0.2874	1000000	341644	8812.39	130.279	0.0709364	6.439e-06	2.0056e-10
0.290733	1000000	344470	9205.33	141.908	0.0836888	8.41047e-06	2.92449e-10
0.294067	1000000	347263	9606.87	154.295	0.0983762	1.09196e-05	4.22765e-10
0.2974	1000000	350022	10016.9	167.467	0.115237	1.40951e-05	6.06074e-10
0.300733	1000000	352749	10435.4	181.456	0.13453	1.80923e-05	8.61904e-10
0.304067	1000000	355443	10862.2	196.289	0.156539	2.30975e-05	1.21625e-09
0.3074	1000000	358106	11297.2	211.995	0.181573	2.93333e-05	1.70345e-09
0.310733	1000000	360738	11740.3	228.604	0.209964	3.70647e-05	2.36862e-09
0.314067	1000000	363339	12191.5	246.145	0.242073	4.66051e-05	3.27056e-09
0.3174	1000000	365910	12650.6	264.646	0.27829	5.83242e-05	4.48554e-09
0.320733	1000000	368453	13117.5	284.136	0.319033	7.26563e-05	6.11176e-09
0.324067	1000000	370966	13592.1	304.643	0.364753	9.01092e-05	8.27504e-09
0.3274	1000000	373451	14074.3	326.197	0.415931	0.000111275	1.11356e-08
0.330733	1000000	375908	14564.1	348.824	0.473084	0.000136841	1.48964e-08
0.334067	1000000	378337	15061.2	372.553	0.536763	0.000167601	1.98131e-08
0.3374	1000000	380740	15565.5	397.412	0.607554	0.000204474	2.62063e-08
0.340733	1000000	383116	16077	423.427	0.686081	0.000248512	3.44757e-08
0.344067	1000000	385467	16595.6	450.626	0.773007	0.000300921	4.51176e-08
0.3474	1000000	387791	17121	479.034	0.869034	0.000363081	5.87451e-08
0.350733	1000000	390091	17653.3	508.679	0.974904	0.000436558	7.61123e-08
0.354067	1000000	392366	18192.3	539.586	1.0914	0.000523134	9.81427e-08
0.3574	1000000	394617	18737.9	571.781	1.21936	0.000624823	1.25962e-07
0.360733	1000000	396844	19289.9	605.289	1.35963	0.000743899	1.60939e-07
0.364067	1000000	399047	19848.3	640.133	1.51316	0.000882923	2.04726e-07
0.3674	1000000	401227	20412.9	676.339	1.68088	0.00104477	2.59317e-07
0.370733	1000000	403385	20983.7	713.93	1.86381	0.00123265	3.27103e-07
0.374067	1000000	405521	21560.4	752.929	2.06302	0.00145017	4.10944e-07
0.3774	1000000	407634	22143.1	793.358	2.27959	0.00170133	5.1425e-07
0.380733	1000000	409726	22731.6	835.241	2.51468	0.00199058	6.41067e-07
0.384067	1000000	411797	23325.7	878.599	2.76949	0.00232287	7.96187e-07
0.3874	1000000	413847	23925.3	923.452	3.04528	0.00270367	9.85259e-07
0.390733	1000000	415876	24530.5	969.822	3.34334	0.00313901	1.21493e-06
0.394067	1000000	417885	25140.9	1017.73	3.66502	0.00363556	1.49298e-06
0.3974	1000000	419875	25756.6	1067.19	4.01174	0.00420063	1.82852e-06
0.400733	1000000	421844	26377.4	1118.23	4.38495	0.00484227	2.23216e-06
0.404067	1000000	423795	27003.2	1170.86	4.78614	0.00556928	2.71622e-06
0.4074	1000000	425726	27634	1225.11	5.21689	0.0063913	3.29497e-06
0.410733	1000000	427639	28269.5	1280.98	5.67881	0.00731885	3.98491e-06
0.414067	1000000	429534	28909.7	1338.5	6.17356	0.00836337	4.80507e-06
0.4174	1000000	431410	29554.5	1397.68	6.70285	0.00953733	5.77729e-06
0.420733	1000000	433269	30203.7	1458.54	7.26846	0.0108543	6.92664e-06
0.424067	1000000	435110	30857.4	1521.1	7.87221	0.0123289	8.28177e-06
0.4274	1000000	436934	31515.3	1585.36	8.51597	0.013977	9.87538e-06
0.430733	1000000	438741	32177.4	1651.35	9.20168	0.0158158	1.17447e-05
0.434067	1000000	440531	32843.6	1719.07	9.9313	0.0178638	1.3932e-05
0.4374	1000000	442304	33513.8	1788.54	10.7069	0.020141	1.64852e-05
0.440733	1000000	444062	34187.9	1859.77	11.5305	0.0226688	1.94585e-05
0.444067	1000000	445803	34865.7	1932.78	12.4043	0.0254703	2.2913e-05
0.4474	1000000	447529	35547.3	2007.57	13.3304	0.0285703	2.69174e-05
0.450733	1000000	449239	36232.5	2084.16	14.3111	0.0319952	3.15492e-05
0.454067	1000000	450934	36921.1	2162.55	15.3487	0.0357734	3.6895e-05
0.4574	1000000	452613	37613.3	2242.76	16.4455	0.0399352	4.3052e-05
0.460733	1000000	454278	38308.7	2324.79	17.6038	0.0445129	5.01285e-05
0.464067	1000000	455928	39007.5	2408.66	18.8262	0.0495411	5.82455e-05
0.4674	1000000	457564	39709.3	2494.38	20.1151	0.0550565	6.75375e-05
0.470733	1000000	459186	40414.3	2581.94	21.473	0.061098	7.81541e-05
0.474067	1000000	460793	41122.3	2671.36	22.9024	0.067707	9.02612e-05
0.4774	1000000	462387	41833.2	2762.65	24.4061	0.0749277	0.000104042
0.480733	1000000	463967	42546.9	2855.81	25.9866	0.0828066	0.000119701
0.484067	1000000	465533	43263.4	2950.84	27.6467	0.091393	0.00013746
0.4874	1000000	467087	43982.5	3047.76	29.389	0.100739	0.000157567
0.490733	1000000	468627	44704.3	3146.57	31.2165	0.1109	0.000180294
0.494067	1000000	470154	45428.6	3247.27	33.1318	0.121934	0.00020594
0.4974	1000000	471669	46155.3	3349.86	35.138	0.133902	0.00023483
0.500734	1000000	473171	46884.4	3454.36	37.2378	0.146869	0.000267324
0.504067	1000000	474660	47615.8	3560.76	39.4342	0.160903	0.000303814
0.5074	1000000	476138	48349.5	3669.06	41.7302	0.176074	0.000344727
0.510734	1000000	477603	49085.3	3779.27	44.1288	0.19246	0.000390531
0.514067	1000000	479057	49823.2	3891.4	46.6331	0.210137	0.000441735
0.5174	1000000	480498	50563.1	4005.43	49.2461	0.229189	0.000498891
0.520734	1000000	481929	51305	4121.38	51.9709	0.249702	0.0005626
0.524067	1000000	483347	52048.8	4239.25	54.8107	0.271766	0.000633515
0.5274	1000000	484755	52794.4	4359.03	57.7687	0.295476	0.000712342
0.530734	1000000	486151	53541.8	4480.72	60.848	0.320932	0.000799846
0.534067	1000000	487537	54290.8	4604.33	64.0519	0.348236	0.000896852
0.5374	1000000	488911	55041.6	4729.85	67.3837	0.377496	0.00100425
0.540734	1000000	490275	55793.9	4857.29	70.8465	0.408825	0.00112301
0.544067	1000000	491628	56547.7	4986.64	74.4438	0.442339	0.00125417
0.5474	1000000	492971	57303	5117.89	78.1789	0.478161	0.00139883
0.550734	1000000	494304	58059.7	5251.06	82.055	0.516416	0.00155821
0.554067	1000000	495626	58817.8	5386.13	86.0756	0.557238	0.00173358
0.5574	1000000	496938	59577.1	5523.11	90.244	0.600762	0.00192633
0.560734	1000000	498240	60337.7	5661.98	94.5637	0.647131	0.00213794
0.564067	1000000	499533	61099.5	5802.76	99.0381	0.696492	0.00236999
0.5674	1000000	500816	61862.4	5945.42	103.671	0.748998	0.00262418
0.570734	1000000	502089	62626.5	6089.98	108.465	0.804808	0.00290232
0.574067	1000000	503353	63391.5	6236.42	113.424	0.864085	0.00320633
0.5774	1000000	504608	64157.6	6384.75	118.551	0.926999	0.00353828
0.580734	1000000	505853	64924.5	6534.95	123.851	0.993725	0.00390036
0.584067	1000000	507089	65692.4	6687.03	129.326	1.06445	0.00429491
0.5874	1000000	508316	66461.1	6840.98	134.98	1.13935	0.00472441
0.590734	1000000	509535	67230.7	6996.78	140.817	1.21862	0.00519149
0.594067	1000000	510744	68000.9	7154.45	146.839	1.30247	0.00569897
0.5974	1000000	511945	68771.9	7313.96	153.051	1.3911	0.00624981
0.600734	1000000	513137	69543.6	7475.32	159.457	1.48472	0.00684716
0.604067	1000000	514321	70315.9	7638.52	166.059	1.58355	0.00749435
0.6074	1000000	515497	71088.7	7803.56	172.861	1.68782	0.00819491
0.610734	1000000	516664	71862.2	7970.42	179.866	1.79776	0.00895257
0.614067	1000000	517823	72636.1	8139.1	187.079	1.91359	0.00977127
0.6174	1000000	518974	73410.5	8309.59	194.503	2.03558	0.0106552
0.620734	1000000	520117	74185.3	8481.89	202.141	2.16397	0.0116087
0.624067	1000000	521252	74960.5	8655.99	209.997	2.29902	0.0126364
0.6274	1000000	522379	75736	8831.88	218.075	2.441	0.0137431
0.630734	1000000	523498	76511.9	9009.56	226.377	2.59017	0.0149341
0.634067	1000000	524610	77288	9189.01	234.907	2.74681	0.0162147
0.6374	1000000	525714	78064.4	9370.22	243.67	2.91122	0.0175905
0.640734	1000000	526811	78841	9553.2	252.668	3.08368	0.0190676
0.644067	1000000	527900	79617.7	9737.93	261.905	3.2645	0.0206521
0.6474	1000000	528982	80394.6	9924.41	271.384	3.45398	0.0223507
0.650734	1000000	530057	81171.7	10112.6	281.109	3.65244	0.0241701
0.654067	1000000	531125	81948.8	10302.6	291.084	3.8602	0.0261176
0.6574	1000000	532185	82725.9	10494.2	301.311	4.07758	0.0282007
0.660734	1000000	533239	83503.1	10687.6	311.795	4.30493	0.0304274
0.664067	1000000	534286	84280.2	10882.6	322.538	4.54259	0.0328057
0.6674	1000000	535325	85057.3	11079.4	333.544	4.7909	0.0353444
0.670734	1000000	536359	85834.4	11277.8	344.817	5.05024	0.0380525
0.674067	1000000	537385	86611.3	11478	356.359	5.32095	0.0409393
0.6774	1000000	538405	87388.1	11679.7	368.175	5.60342	0.0440146
0.680734	1000000	539418	88164.8	11883.2	380.267	5.89803	0.0472887
0.684067	1000000	540424	88941.3	12088.2	392.639	6.20517	0.0507722
0.6874	1000000	541425	89717.6	12295	405.294	6.52522	0.0544761
0.690734	1000000	542419	90493.6	12503.3	418.236	6.8586	0.0584121
0.694067	1000000	543406	91269.4	12713.3	431.467	7.20571	0.0625921
0.6974	1000000	544388	92044.9	12924.8	444.991	7.56697	0.0670285
0.700734	1000000	545363	92820.2	13138	458.812	7.94281	0.0717345
0.704067	1000000	546332	93595.1	13352.7	472.932	8.33366	0.0767233
0.7074	1000000	547295	94369.6	13569	487.354	8.73995	0.0820091
0.710734	1000000	548252	95143.8	13786.9	502.082	9.16214	0.0876063
0.714067	1000000	549203	95917.6	14006.4	517.119	9.60068	0.09353
0.7174	1000000	550149	96691	14227.4	532.468	10.056	0.0997958
0.720734	1000000	551088	97464	14449.9	548.132	10.5287	0.10642
0.724067	1000000	552022	98236.5	14674	564.115	11.019	0.113419
0.7274	1000000	552950	99008.5	14899.5	580.418	11.5277	0.120811
0.730734	1000000	553873	99780	15126.6	597.046	12.055	0.128612
0.734067	1000000	554790	100551	15355.2	614	12.6016	0.136843
0.7374	1000000	555701	101322	15585.2	631.285	13.168	0.145522
0.740734	1000000	556607	102092	15816.8	648.903	13.7545	0.154668
0.744067	1000000	557508	102861	16049.8	666.856	14.3619	0.164303
0.7474	1000000	558403	103630	16284.2	685.149	14.9905	0.174448
0.750734	1000000	559293	104398	16520.1	703.783	15.641	0.185124
0.754067	1000000	560177	105166	16757.4	722.762	16.3138	0.196353
0.7574	1000000	561057	105932	16996.2	742.088	17.0096	0.20816
0.760734	1000000	561931	106699	17236.3	761.763	17.7288	0.220568
0.764067	1000000	562800	107464	17477.9	781.792	18.472	0.233602
0.7674	1000000	563665	108229	17720.9	802.176	19.2399	0.247287
0.770734	1000000	564524	108994	17965.2	822.918	20.0329	0.261649
0.774067	1000000	565378	109757	18210.9	844.021	20.8517	0.276715
0.7774	1000000	566227	110520	18458	865.487	21.6968	0.292513
0.780734	1000000	567072	111282	18706.4	887.32	22.5688	0.309072
0.784067	1000000	567911	112043	18956.1	909.52	23.4684	0.326421
0.7874	1000000	568746	112804	19207.2	932.092	24.3961	0.344589
0.790734	1000000	569576	113564	19459.6	955.037	25.3526	0.363609
0.794067	1000000	570402	114323	19713.3	978.358	26.3384	0.38351
0.7974	1000000	571222	115081	19968.3	1002.06	27.3543	0.404328
0.800734	1000000	572038	115838	20224.6	1026.14	28.4008	0.426094
0.804067	1000000	572850	116595	20482.1	1050.6	29.4785	0.448843
0.8074	1000000	573657	117351	20740.9	1075.45	30.5882	0.47261
0.810734	1000000	574460	118106	21001	1100.69	31.7304	0.497432
0.814067	1000000	575258	118860	21262.3	1126.31	32.9058	0.523345
0.8174	1000000	576052	119613	21524.9	1152.33	34.1151	0.550388
0.820734	1000000	576841	120365	21788.7	1178.74	35.359	0.578599
0.824067	1000000	577626	121116	22053.7	1205.55	36.638	0.608019
0.8274	1000000	578407	121867	22319.9	1232.76	37.953	0.638687
0.830734	1000000	579184	122616	22587.2	1260.37	39.3045	0.670646
0.834067	1000000	579956	123365	22855.8	1288.38	40.6933	0.703938
0.8374	1000000	580724	124113	23125.5	1316.8	42.12	0.738607
0.840734	1000000	581488	124860	23396.4	1345.62	43.5854	0.774697
0.844067	1000000	582248	125605	23668.5	1374.85	45.0901	0.812255
0.8474	1000000	583004	126350	23941.7	1404.5	46.6348	0.851326
0.850734	1000000	583756	127094	24216	1434.55	48.2204	0.891959
0.854067	1000000	584504	127837	24491.4	1465.02	49.8474	0.934202
0.8574	1000000	585248	128579	24768	1495.91	51.5166	0.978104
0.860734	1000000	585988	129320	25045.6	1527.21	53.2288	1.02372
0.864067	1000000	586724	130060	25324.4	1558.94	54.9846	1.07109
0.8674	1000000	587456	130799	25604.2	1591.09	56.7848	1.12028
0.870734	1000000	588185	131537	25885.1	1623.66	58.6301	1.17134
0.874067	1000000	588910	132274	26167	1656.65	60.5214	1.22432
0.8774	1000000	589631	133010	26450	1690.07	62.4592	1.27928
0.880734	1000000	590348	133745	26734	1723.92	64.4444	1.33628
0.884067	1000000	591061	134478	27019.1	1758.2	66.4777	1.39537
0.8874	1000000	591771	135211	27305.2	1792.91	68.5599	1.45662
0.890734	1000000	592477	135943	27592.3	1828.06	70.6918	1.52008
0.894067	1000000	593180	136674	27880.4	1863.63	72.874	1.58581
0.8974	1000000	593879	137403	28169.5	1899.65	75.1075	1.65388
0.900734	1000000	594575	138132	28459.6	1936.1	77.3928	1.72436
0.904067	1000000	595267	138859	28750.6	1972.99	79.7309	1.7973
0.9074	1000000	595955	139586	29042.6	2010.32	82.1225	1.87277
0.910734	1000000	596640	140311	29335.6	2048.09	84.5684	1.95084
0.914067	1000000	597322	141035	29629.5	2086.31	87.0693	2.03158
0.9174	1000000	598000	141758	29924.3	2124.96	89.6261	2.11505
0.920734	1000000	598675	142480	30220.1	2164.07	92.2395	2.20133
0.924067	1000000	599346	143201	30516.8	2203.62	94.9103	2.29049
0.9274	1000000	600015	143921	30814.3	2243.61	97.6393	2.38259
0.930734	1000000	600680	144640	31112.8	2284.06	100.427	2.47772
0.934067	1000000	601341	145358	31412.2	2324.95	103.275	2.57595
0.9374	1000000	602000	146074	31712.4	2366.3	106.184	2.67735
0.940734	1000000	602655	146789	32013.5	2408.1	109.154	2.78201
0.944067	1000000	603307	147504	32315.5	2450.35	112.186	2.88999
0.9474	1000000	603956	148217	32618.4	2493.05	115.281	3.00138
0.950734	1000000	604601	148929	32922	2536.21	118.44	3.11627
0.954067	1000000	605244	149639	33226.5	2579.82	121.663	3.23472
0.9574	1000000	605884	150349	33531.9	2623.89	124.952	3.35682
0.960734	1000000	606520	151058	33838	2668.42	128.308	3.48267
0.964067	1000000	607154	151765	34145	2713.41	131.73	3.61234
0.9674	1000000	607784	152471	34452.7	2758.85	135.22	3.74591
0.970734	1000000	608411	153176	34761.2	2804.76	138.779	3.88348
0.974067	1000000	609036	153880	35070.6	2851.13	142.408	4.02514
0.9774	1000000	609657	154583	35380.7	2897.95	146.107	4.17097
0.980734	1000000	610276	155284	35691.5	2945.24	149.877	4.32106
0.984067	1000000	610892	155985	36003.1	2993	153.719	4.47551
0.9874	1000000	611504	156684	36315.5	3041.21	157.633	4.63442
0.990734	1000000	612114	157382	36628.6	3089.89	161.622	4.79786
0.994067	1000000	612721	158079	36942.4	3139.03	165.684	4.96594
0.9974	1000000	613326	158775	37257	3188.64	169.822	5.13876
1.00073	1000000	613927	159470	37572.2	3238.72	174.037	5.31641
1.00407	1000000	614526	160163	37888.2	3289.26	178.328	5.49899
1.0074	1000000	615122	160855	38204.9	3340.26	182.696	5.6866
1.01073	1000000	615715	161546	38522.2	3391.74	187.144	5.87935
1.01407	1000000	616306	162236	38840.3	3443.68	191.67	6.07732
1.0174	1000000	616894	162925	39159	3496.09	196.277	6.28064
1.02073	1000000	617479	163612	39478.3	3548.97	200.965	6.48939
1.02407	1000000	618061	164299	39798.4	3602.31	205.735	6.70369
1.0274	1000000	618641	164984	40119.1	3656.13	210.587	6.92363
1.03073	1000000	619219	165668	40440.4	3710.41	215.523	7.14934
1.03407	1000000	619793	166351	40762.4	3765.17	220.543	7.38092
1.0374	1000000	620365	167032	41084.9	3820.39	225.648	7.61847
1.04073	1000000	620935	167713	41408.1	3876.09	230.839	7.8621
1.04407	1000000	621502	168392	41732	3932.25	236.117	8.11193
1.0474	1000000	622067	169070	42056.4	3988.88	241.482	8.36808
1.05073	1000000	622629	169747	42381.4	4045.99	246.936	8.63065
1.05407	1000000	623188	170422	42707	4103.56	252.479	8.89975
1.0574	1000000	623745	171097	43033.2	4161.61	258.112	9.17551
1.06073	1000000	624300	171770	43360	4220.13	263.835	9.45804
1.06407	1000000	624852	172442	43687.3	4279.11	269.651	9.74746
1.0674	1000000	625402	173113	44015.2	4338.57	275.558	10.0439
1.07073	1000000	625949	173783	44343.6	4398.5	281.559	10.3474
1.07407	1000000	626495	174451	44672.6	4458.9	287.654	10.6582
1.0774	1000000	627037	175118	45002.1	4519.78	293.844	10.9764
1.08073	1000000	627578	175785	45332.2	4581.12	300.129	11.302
1.08407	1000000	628116	176450	45662.8	4642.93	306.511	11.6353
1.0874	1000000	628651	177113	45993.9	4705.22	312.99	11.9763
1.09073	1000000	629185	177776	46325.5	4767.97	319.568	12.3252
1.09407	1000000	629716	178437	46657.6	4831.2	326.243	12.682
1.0974	1000000	630245	179097	46990.2	4894.89	333.019	13.047
1.10073	1000000	630771	179756	47323.3	4959.06	339.895	13.4202
1.10407	1000000	631296	180414	47656.9	5023.7	346.872	13.8018
1.1074	1000000	631818	181071	47991	5088.8	353.951	14.1919
1.11073	1000000	632338	181726	48325.5	5154.38	361.133	14.5906
1.11407	1000000	632856	182380	48660.5	5220.42	368.418	14.9981
1.1174	1000000	633371	183033	48996	5286.94	375.808	15.4145
1.12073	1000000	633885	183685	49331.9	5353.92	383.303	15.8399
1.12407	1000000	634396	184336	49668.2	5421.37	390.904	16.2744
1.1274	1000000	634905	184985	50005	5489.29	398.611	16.7183
1.13073	1000000	635412	185634	50342.2	5557.68	406.426	17.1716
1.13407	1000000	635917	186281	50679.9	5626.54	414.348	17.6345
1.1374	1000000	636420	186927	51017.9	5695.86	422.38	18.107
1.14073	1000000	636921	187571	51356.4	5765.65	430.522	18.5895
1.14407	1000000	637420	188215	51695.3	5835.91	438.774	19.0818
1.1474	1000000	637917	188857	52034.6	5906.63	447.137	19.5844
1.15073	1000000	638411	189499	52374.2	5977.81	455.612	20.0971
1.15407	1000000	638904	190139	52714.3	6049.47	464.199	20.6203
1.1574	1000000	639395	190777	53054.7	6121.58	472.9	21.1541
1.16073	1000000	639883	191415	53395.6	6194.17	481.716	21.6985
1.16407	1000000	640370	192052	53736.8	6267.21	490.646	22.2537
1.1674	1000000	640855	192687	54078.3	6340.72	499.692	22.8199
1.17073	1000000	641338	193321	54420.3	6414.69	508.854	23.3972
1.17407	1000000	641819	193954	54762.5	6489.12	518.133	23.9858
1.1774	1000000	642298	194586	55105.2	6564.01	527.53	24.5858
1.18073	1000000	642775	195216	55448.1	6639.37	537.046	25.1973
1.18407	1000000	643250	195846	55791.4	6715.18	546.68	25.8206
1.1874	1000000	643723	196474	56135.1	6791.46	556.435	26.4557
1.19073	1000000	644194	197101	56479	6868.19	566.311	27.1027
1.19407	1000000	644664	197727	56823.3	6945.38	576.307	27.7619
1.1974	1000000	645132	198352	57167.9	7023.03	586.426	28.4334
1.20073	1000000	645598	198976	57512.8	7101.14	596.668	29.1174
1.20407	1000000	646062	199598	57858	7179.7	607.033	29.8139
1.2074	1000000	646524	200219	58203.5	7258.72	617.522	30.5232
1.21073	1000000	646984	200839	58549.3	7338.2	628.136	31.2453
1.21407	1000000	647443	201458	58895.4	7418.13	638.876	31.9805
1.2174	1000000	647900	202076	59241.8	7498.51	649.741	32.7289
1.22073	1000000	648355	202693	59588.4	7579.34	660.734	33.4906
1.22407	1000000	648808	203308	59935.4	7660.63	671.854	34.2659
1.2274	1000000	649259	203923	60282.5	7742.37	683.103	35.0548
1.23073	1000000	649709	204536	60630	7824.55	694.48	35.8574
1.23407	1000000	650157	205148	60977.7	7907.19	705.986	36.6741
1.2374	1000000	650604	205759	61325.7	7990.28	717.623	37.5048
1.24073	1000000	651048	206369	61673.9	8073.81	729.391	38.3498
1.24407	1000000	651491	206977	62022.3	8157.8	741.29	39.2093
1.2474	1000000	651933	207585	62371	8242.23	753.321	40.0833
1.25073	1000000	652372	208191	62720	8327.1	765.485	40.972
1.25407	1000000	652810	208797	63069.1	8412.42	777.783	41.8757
1.2574	1000000	653247	209401	63418.5	8498.18	790.214	42.7944
1.26073	1000000	653681	210004	63768.1	8584.39	802.78	43.7282
1.26407	1000000	654114	210605	64117.9	8671.04	815.481	44.6775
1.2674	1000000	654546	211206	64467.9	8758.13	828.318	45.6422
1.27073	1000000	654976	211806	64818.2	8845.66	841.292	46.6226
1.27407	1000000	655404	212404	65168.6	8933.62	854.402	47.6189
1.2774	1000000	655830	213001	65519.2	9022.03	867.65	48.6311
1.28073	1000000	656255	213598	65870.1	9110.88	881.037	49.6595
1.28407	1000000	656679	214193	66221.1	9200.16	894.562	50.7042
1.2874	1000000	657101	214787	66572.3	9289.88	908.227	51.7653
1.29073	1000000	657521	215379	66923.6	9380.03	922.031	52.8431
1.29407	1000000	657940	215971	67275.2	9470.61	935.977	53.9376
1.2974	1000000	658357	216562	67626.9	9561.63	950.063	55.0491
1.30073	1000000	658773	217151	67978.8	9653.08	964.291	56.1777
1.30407	1000000	659187	217740	68330.8	9744.96	978.662	57.3235
1.3074	1000000	659600	218327	68683	9837.27	993.175	58.4868
1.31073	1000000	660011	218913	69035.4	9930.01	1007.83	59.6676
1.31407	1000000	660421	219498	69387.9	10023.2	1022.63	60.8661
1.3174	1000000	660829	220082	69740.6	10116.8	1037.58	62.0826
1.32073	1000000	661236	220665	70093.3	10210.8	1052.67	63.3171
1.32407	1000000	661641	221247	70446.3	10305.2	1067.9	64.5698
1.3274	1000000	662045	221827	70799.3	10400.1	1083.29	65.8409
1.33073	1000000	662447	222407	71152.5	10495.4	1098.81	67.1305
1.33407	1000000	662848	222985	71505.9	10591.1	1114.49	68.4387
1.3374	1000000	663248	223562	71859.3	10687.2	1130.31	69.7659
1.34073	1000000	663646	224139	72212.9	10783.8	1146.28	71.112
1.34407	1000000	664043	224714	72566.6	10880.7	1162.4	72.4773
1.3474	1000000	664438	225288	72920.3	10978.1	1178.67	73.862
1.35073	1000000	664832	225861	73274.2	11075.9	1195.09	75.2661
1.35407	1000000	665224	226433	73628.2	11174.1	1211.66	76.6899
1.3574	1000000	665616	227003	73982.3	11272.8	1228.38	78.1334
1.36073	1000000	666005	227573	74336.5	11371.8	1245.25	79.597
1.36407	1000000	666394	228142	74690.8	11471.3	1262.28	81.0806
1.3674	1000000	666781	228709	75045.2	11571.1	1279.45	82.5846
1.37073	1000000	667166	229276	75399.6	11671.4	1296.78	84.1089
1.37407	1000000	667551	229841	75754.2	11772.1	1314.26	85.6539
1.3774	1000000	667934	230406	76108.8	11873.2	1331.89	87.2196
1.38073	1000000	668315	230969	76463.5	11974.7	1349.68	88.8062
1.38407	1000000	668696	231531	76818.3	12076.6	1367.62	90.4139
1.3874	1000000	669075	232092	77173.1	12178.9	1385.72	92.0429
1.39073	1000000	669453	232653	77528	12281.6	1403.97	93.6932
1.39407	1000000	669829	233212	77883	12384.7	1422.38	95.365
1.3974	1000000	670204	233770	78238	12488.2	1440.94	97.0586
1.40073	1000000	670578	234327	78593.1	12592.1	1459.66	98.774
1.40407	1000000	670951	234882	78948.2	12696.4	1478.54	100.511
1.4074	1000000	671322	235437	79303.4	12801.1	1497.57	102.271
1.41073	1000000	671692	235991	79658.6	12906.2	1516.77	104.053
1.41407	1000000	672061	236544	80013.8	13011.6	1536.12	105.857
1.4174	1000000	672429	237096	80369.1	13117.5	1555.63	107.684
1.42073	1000000	672795	237646	80724.5	13223.8	1575.29	109.534
1.42407	1000000	673160	238196	81079.8	13330.4	1595.12	111.407
1.4274	1000000	673524	238745	81435.2	13437.5	1615.11	113.303
1.43073	1000000	673887	239292	81790.7	13544.9	1635.26	115.222
1.43407	1000000	674248	239839	82146.1	13652.7	1655.56	117.164
1.4374	1000000	674608	240384	82501.6	13761	1676.03	119.13
1.44073	1000000	674967	240929	82857.1	13869.5	1696.66	121.12
1.44407	1000000	675325	241472	83212.6	13978.5	1717.46	123.134
1.4474	1000000	675682	242015	83568.1	14087.9	1738.41	125.171
1.45073	1000000	676037	242556	83923.6	14197.6	1759.52	127.233
1.45407	1000000	676392	243097	84279.1	14307.7	1780.8	129.319
1.4574	1000000	676745	243636	84634.6	14418.2	1802.25	131.43
1.46073	1000000	677097	244174	84990.2	14529.1	1823.85	133.565
1.46407	1000000	677448	244712	85345.7	14640.3	1845.62	135.725
1.4674	1000000	677797	245248	85701.2	14752	1867.55	137.91
1.47073	1000000	678146	245783	86056.7	14864	1889.65	140.12
1.47407	1000000	678493	246318	86412.2	14976.3	1911.91	142.355
1.4774	1000000	678840	246851	86767.7	15089.1	1934.34	144.616
1.48073	1000000	679185	247383	87123.2	15202.2	1956.93	146.902
1.48407	1000000	679529	247915	87478.7	15315.6	1979.68	149.214
1.4874	1000000	679872	248445	87834.1	15429.5	2002.61	151.551
1.49073	1000000	680214	248974	88189.5	15543.7	2025.7	153.915
1.49407	1000000	680554	249503	88544.9	15658.2	2048.95	156.304
1.4974	1000000	680894	250030	88900.2	15773.2	2072.37	158.72
1.50073	1000000	681233	250556	89255.6	15888.5	2095.96	161.162
1.50407	1000000	681570	251082	89610.9	16004.1	2119.72	163.631
1.5074	1000000	681906	251606	89966.1	16120.1	2143.64	166.126
1.51073	1000000	682242	252130	90321.3	16236.5	2167.74	168.649
1.51407	1000000	682576	252652	90676.5	16353.2	2191.99	171.198
1.5174	1000000	682909	253173	91031.6	16470.3	2216.42	173.774
1.52073	1000000	683241	253694	91386.7	16587.7	2241.02	176.377
1.52407	1000000	683572	254214	91741.7	16705.5	2265.78	179.008
1.5274	1000000	683902	254732	92096.7	16823.7	2290.72	181.667
1.53073	1000000	684231	255250	92451.7	16942.2	2315.82	184.353
1.53407	1000000	684559	255766	92806.5	17061	2341.1	187.067
1.5374	1000000	684886	256282	93161.4	17180.2	2366.54	189.808
1.54073	1000000	685212	256797	93516.1	17299.7	2392.15	192.578
1.54407	1000000	685537	257311	93870.8	17419.6	2417.94	195.376
1.5474	1000000	685861	257824	94225.4	17539.8	2443.89	198.203
1.55073	1000000	686184	258336	94580	17660.4	2470.01	201.057
1.55407	1000000	686506	258847	94934.5	17781.3	2496.31	203.941
1.5574	1000000	686827	259357	95288.9	17902.5	2522.77	206.853
1.56073	1000000	687147	259866	95643.3	18024.1	2549.41	209.794
1.56407	1000000	687465	260374	95997.6	18146	2576.22	212.764
1.5674	1000000	687783	260881	96351.8	18268.3	2603.2	215.764
1.57073	1000000	688100	261387	96705.9	18390.9	2630.35	218.792
1.57407	1000000	688416	261893	97060	18513.8	2657.67	221.85
1.5774	1000000	688731	262397	97413.9	18637.1	2685.17	224.937
1.58073	1000000	689045	262901	97767.8	18760.6	2712.84	228.055
1.58407	1000000	689359	263403	98121.6	18884.6	2740.68	231.201
1.5874	1000000	689671	263905	98475.3	19008.8	2768.69	234.378
1.59073	1000000	689982	264405	98828.9	19133.4	2796.88	237.585
1.59407	1000000	690292	264905	99182.4	19258.3	2825.24	240.822
1.5974	1000000	690601	265404	99535.8	19383.5	2853.77	244.089
1.60073	1000000	690910	265902	99889.2	19509	2882.47	247.387
1.60407	1000000	691217	266399	100242	19634.9	2911.35	250.716
1.6074	1000000	691524	266895	100596	19761.1	2940.4	254.074
1.61073	1000000	691829	267391	100949	19887.6	2969.63	257.464
1.61407	1000000	692134	267885	101301	20014.4	2999.03	260.885
1.6174	1000000	692438	268379	101654	20141.5	3028.6	264.337
1.62073	1000000	692741	268871	102007	20269	3058.35	267.819
1.62407	1000000	693043	269363	102360	20396.8	3088.27	271.333
1.6274	1000000	693344	269854	102712	20524.8	3118.37	274.879
1.63073	1000000	693644	270343	103064	20653.2	3148.64	278.456
1.63407	1000000	693944	270832	103417	20781.9	3179.08	282.064
1.6374	1000000	694242	271320	103769	20910.9	3209.7	285.705
1.64073	1000000	694540	271808	104121	21040.2	3240.49	289.377
1.64407	1000000	694836	272294	104473	21169.9	3271.46	293.081
1.6474	1000000	695132	272779	104825	21299.8	3302.6	296.817
1.65073	1000000	695427	273264	105176	21430	3333.92	300.586
1.65407	1000000	695721	273747	105528	21560.6	3365.41	304.387
1.6574	1000000	696014	274230	105879	21691.4	3397.08	308.22
1.66073	1000000	696307	274712	106230	21822.5	3428.92	312.085
1.66407	1000000	696598	275193	106582	21954	3460.94	315.984
1.6674	1000000	696889	275673	106933	22085.7	3493.13	319.915
1.67073	1000000	697179	276152	107284	22217.7	3525.5	323.879
1.67407	1000000	697468	276631	107634	22350.1	3558.05	327.876
1.6774	1000000	697756	277108	107985	22482.7	3590.76	331.905
1.68073	1000000	698043	277585	108335	22615.6	3623.66	335.969
1.68407	1000000	698330	278061	108686	22748.8	3656.73	340.065
1.6874	1000000	698615	278536	109036	22882.3	3689.97	344.195
1.69073	1000000	698900	279010	109386	23016	3723.39	348.358
1.69407	1000000	699184	279483	109736	23150.1	3756.99	352.555
1.6974	1000000	699468	279956	110086	23284.5	3790.76	356.785
1.70073	1000000	699750	280427	110435	23419.1	3824.71	361.049
1.70407	1000000	700032	280898	110785	23554	3858.83	365.348
1.7074	1000000	700312	281368	111134	23689.2	3893.13	369.68
1.71073	1000000	700593	281837	111483	23824.7	3927.61	374.046
1.71407	1000000	700872	282305	111832	23960.4	3962.26	378.446
1.7174	1000000	701150	282773	112181	24096.5	3997.08	382.881
1.72073	1000000	701428	283239	112530	24232.8	4032.08	387.35
1.72407	1000000	701705	283705	112879	24369.4	4067.26	391.853
1.7274	1000000	701981	284170	113227	24506.3	4102.61	396.391
1.73073	1000000	702256	284634	113575	24643.4	4138.14	400.964
1.73407	1000000	702531	285097	113923	24780.8	4173.85	405.571
1.7374	1000000	702805	285560	114271	24918.5	4209.73	410.213
1.74073	1000000	703078	286021	114619	25056.4	4245.78	414.891
1.74407	1000000	703350	286482	114967	25194.7	4282.01	419.603
1.7474	1000000	703622	286942	115314	25333.2	4318.42	424.35
1.75073	1000000	703892	287401	115661	25471.9	4355	429.132
1.75407	1000000	704163	287859	116009	25610.9	4391.76	433.95
1.7574	1000000	704432	288317	116356	25750.2	4428.69	438.803
1.76073	1000000	704700	288774	116702	25889.8	4465.8	443.691
1.76407	1000000	704968	289230	117049	26029.6	4503.08	448.615
1.7674	1000000	705235	289685	117395	26169.6	4540.54	453.575
1.77073	1000000	705502	290139	117742	26309.9	4578.18	458.57
1.77407	1000000	705767	290593	118088	26450.5	4615.99	463.601
1.7774	1000000	706032	291045	118434	26591.4	4653.97	468.668
1.78073	1000000	706296	291497	118779	26732.5	4692.13	473.771
1.78407	1000000	706560	291948	119125	26873.8	4730.47	478.909
1.7874	1000000	706823	292399	119470	27015.4	4768.97	484.084
1.79073	1000000	707085	292848	119816	27157.2	4807.66	489.295
1.79407	1000000	707346	293297	120161	27299.3	4846.52	494.542
1.7974	1000000	707607	293745	120506	27441.7	4885.55	499.826
1.80073	1000000	707867	294192	120850	27584.3	4924.76	505.146
1.80407	1000000	708126	294638	121195	27727.1	4964.15	510.502
1.8074	1000000	708384	295084	121539	27870.2	5003.71	515.895
1.81073	1000000	708642	295529	121883	28013.6	5043.44	521.324
1.81407	1000000	708899	295972	122227	28157.1	5083.34	526.79
1.8174	1000000	709156	296416	122571	28300.9	5123.43	532.293
1.82073	1000000	709412	296858	122914	28445	5163.68	537.832
1.82407	1000000	709667	297300	123258	28589.3	5204.11	543.409
1.8274	1000000	709921	297741	123601	28733.8	5244.71	549.022
1.83073	1000000	710175	298181	123944	28878.6	5285.49	554.673
1.83407	1000000	710428	298620	124287	29023.6	5326.44	560.36
1.8374	1000000	710680	299059	124629	29168.9	5367.57	566.085
1.84073	1000000	710932	299496	124972	29314.3	5408.87	571.846
1.84407	1000000	711183	299933	125314	29460	5450.34	577.645
1.8474	1000000	711434	300370	125656	29606	5491.98	583.482
1.85073	1000000	711683	300805	125998	29752.1	5533.8	589.355
1.85407	1000000	711932	301240	126340	29898.5	5575.79	595.266
1.8574	1000000	712181	301674	126681	30045.2	5617.96	601.215
1.86073	1000000	712429	302107	127022	30192	5660.29	607.201
1.86407	1000000	712676	302540	127363	30339.1	5702.8	613.225
1.8674	1000000	712922	302971	127704	30486.4	5745.49	619.286
1.87073	1000000	713168	303402	128045	30633.9	5788.34	625.385
1.87407	1000000	713414	303833	128385	30781.7	5831.37	631.522
1.8774	1000000	713658	304262	128726	30929.6	5874.57	637.697
1.88073	1000000	713902	304691	129066	31077.8	5917.94	643.909
1.88407	1000000	714146	305119	129405	31226.2	5961.48	650.16
1.8874	1000000	714388	305546	129745	31374.9	6005.19	656.448
1.89073	1000000	714630	305973	130084	31523.7	6049.08	662.774
1.89407	1000000	714872	306399	130424	31672.7	6093.13	669.139
1.8974	1000000	715113	306824	130763	31822	6137.36	675.541
1.90073	1000000	715353	307248	131101	31971.5	6181.76	681.982
1.90407	1000000	715593	307672	131440	32121.2	6226.33	688.461
1.9074	1000000	715832	308095	131778	32271.1	6271.07	694.978
1.91073	1000000	716070	308517	132117	32421.2	6315.98	701.534
1.91407	1000000	716308	308939	132455	32571.5	6361.07	708.128
1.9174	1000000	716545	309359	132792	32722.1	6406.32	714.76
1.92073	1000000	716782	309779	133130	32872.8	6451.74	721.431
1.92407	1000000	717018	310199	133467	33023.7	6497.33	728.14
1.9274	1000000	717253	310617	133804	33174.9	6543.09	734.888
1.93073	1000000	717488	311035	134141	33326.2	6589.02	741.674
1.93407	1000000	717722	311453	134478	33477.8	6635.12	748.499
1.9374	1000000	717956	311869	134814	33629.5	6681.39	755.362
1.94073	1000000	718189	312285	135151	33781.5	6727.83	762.264
1.94407	1000000	718422	312700	135487	33933.6	6774.43	769.205
1.9474	1000000	718653	313114	135823	34086	6821.21	776.185
1.95073	1000000	718885	313528	136158	34238.5	6868.15	783.203
1.95407	1000000	719116	313941	136494	34391.2	6915.26	790.26
1.9574	1000000	719346	314353	136829	34544.2	6962.54	797.356
1.96073	1000000	719575	314765	137164	34697.3	7009.99	804.491
1.96407	1000000	719804	315176	137498	34850.6	7057.6	811.664
1.9674	1000000	720033	315586	137833	35004.1	7105.38	818.877
1.97073	1000000	720261	315996	138167	35157.8	7153.33	826.128
1.97407	1000000	720488	316404	138501	35311.7	7201.45	833.419
1.9774	1000000	720715	316813	138835	35465.8	7249.73	840.748
1.98073	1000000	720941	317220	139169	35620	7298.18	848.117
1.98407	1000000	721167	317627	139502	35774.5	7346.79	855.525
1.9874	1000000	721392	318033	139835	35929.1	7395.57	862.971
1.99073	1000000	721617	318438	140168	36083.9	7444.52	870.457
1.99407	1000000	721841	318843	140501	36238.9	7493.63	877.982
1.9974	1000000	722064	319247	140834	36394.1	7542.91	885.546
2.00073	1000000	722287	319650	141166	36549.5	7592.35	893.149
2.00407	1000000	722510	320053	141498	36705	7641.96	900.792
2.0074	1000000	722731	320455	141830	36860.7	7691.73	908.474
2.01073	1000000	722953	320857	142161	37016.6	7741.67	916.195
2.01407	1000000	723174	321257	142493	37172.7	7791.77	923.955
2.0174	1000000	723394	321657	142824	37329	7842.03	931.754
2.02073	1000000	723614	322057	143155	37485.4	7892.46	939.593
2.02407	1000000	723833	322455	143485	37642	7943.05	947.471
2.0274	1000000	724051	322853	143816	37798.7	7993.8	955.388
2.03073	1000000	724270	323251	144146	37955.7	8044.72	963.345
2.03407	1000000	724487	323647	144476	38112.8	8095.8	971.341
2.0374	1000000	724704	324043	144806	38270.1	8147.04	979.377
2.04073	1000000	724921	324439	145135	38427.5	8198.45	987.451
2.04407	1000000	725137	324834	145465	38585.1	8250.02	995.566
2.0474	1000000	725353	325228	145794	38742.9	8301.74	1003.72
2.05073	1000000	725568	325621	146123	38900.9	8353.63	1011.91
2.05407	1000000	725782	326014	146451	39059	8405.68	1020.14
2.0574	1000000	725996	326406	146780	39217.3	8457.9	1028.42
2.06073	1000000	726210	326798	147108	39375.7	8510.27	1036.73
2.06407	1000000	726423	327188	147436	39534.3	8562.8	1045.08
2.0674	1000000	726636	327579	147763	39693	8615.5	1053.47
2.07073	1000000	726848	327968	148091	39852	8668.35	1061.9
2.07407	1000000	727059	328357	148418	40011	8721.36	1070.37
2.0774	1000000	727270	328745	148745	40170.3	8774.53	1078.88
2.08073	1000000	727481	329133	149072	40329.7	8827.86	1087.42
2.08407	1000000	727691	329520	149398	40489.2	8881.35	1096.01
2.0874	1000000	727900	329906	149724	40648.9	8935	1104.64
2.09073	1000000	728109	330292	150051	40808.8	8988.81	1113.3
2.09407	1000000	728318	330677	150376	40968.8	9042.77	1122.01
2.0974	1000000	728526	331062	150702	41128.9	9096.89	1130.76
2.10073	1000000	728734	331446	151027	41289.3	9151.17	1139.54
2.10407	1000000	728941	331829	151352	41449.7	9205.61	1148.37
2.1074	1000000	729148	332212	151677	41610.3	9260.2	1157.23
2.11073	1000000	729354	332594	152002	41771.1	9314.95	1166.13
2.11407	1000000	729560	332975	152326	41932	9369.86	1175.08
2.1174	1000000	729765	333356	152650	42093	9424.92	1184.06
2.12073	1000000	729970	333736	152974	42254.2	9480.14	1193.08
2.12407	1000000	730174	334116	153298	42415.6	9535.51	1202.14
2.1274	1000000	730378	334495	153621	42577.1	9591.04	1211.24
2.13073	1000000	730581	334873	153944	42738.7	9646.73	1220.38
2.13407	1000000	730784	335251	154267	42900.5	9702.56	1229.56
2.1374	1000000	730987	335628	154590	43062.4	9758.56	1238.78
2.14073	1000000	731189	336004	154912	43224.4	9814.7	1248.04
2.14407	1000000	731390	336380	155235	43386.6	9871	1257.33
2.1474	1000000	731591	336756	155557	43548.9	9927.46	1266.67
2.15073	1000000	731792	337130	155878	43711.4	9984.06	1276.05
2.15407	1000000	731992	337504	156200	43874	10040.8	1285.46
2.1574	1000000	732192	337878	156521	44036.7	10097.7	1294.92
2.16073	1000000	732391	338251	156842	44199.6	10154.8	1304.41
2.16407	1000000	732590	338623	157163	44362.6	10212	1313.95
2.1674	1000000	732788	338995	157483	44525.8	10269.4	1323.52
2.17073	1000000	732986	339366	157804	44689	10326.9	1333.13
2.17407	1000000	733184	339736	158124	44852.4	10384.6	1342.78
2.1774	1000000	733381	340106	158443	45016	10442.4	1352.47
2.18073	1000000	733577	340476	158763	45179.6	10500.4	1362.2
2.18407	1000000	733774	340844	159082	45343.4	10558.5	1371.97
2.1874	1000000	733969	341213	159401	45507.3	10616.7	1381.78
2.19073	1000000	734165	341580	159720	45671.4	10675.2	1391.63
2.19407	1000000	734360	341947	160039	45835.5	10733.7	1401.52
2.1974	1000000	734554	342314	160357	45999.8	10792.5	1411.44
2.20073	1000000	734748	342680	160675	46164.2	10851.3	1421.41
2.20407	1000000	734942	343045	160993	46328.8	10910.3	1431.41
2.2074	1000000	735135	343409	161310	46493.4	10969.5	1441.46
2.21073	1000000	735328	343774	161628	46658.2	11028.8	1451.54
2.21407	1000000	735520	344137	161945	46823.1	11088.3	1461.66
2.2174	1000000	735712	344500	162262	46988.1	11147.9	1471.82
2.22073	1000000	735903	344862	162578	47153.3	11207.6	1482.02
2.22407	1000000	736094	345224	162895	47318.5	11267.5	1492.26
2.2274	1000000	736285	345586	163211	47483.9	11327.6	1502.54
2.23073	1000000	736475	345946	163527	47649.4	11387.7	1512.85
2.23407	1000000	736665	346306	163842	47815	11448.1	1523.21
2.2374	1000000	736854	346666	164158	47980.7	11508.6	1533.6
2.24073	1000000	737043	347025	164473	48146.6	11569.2	1544.03
2.24407	1000000	737232	347384	164788	48312.5	11629.9	1554.51
2.2474	1000000	737420	347741	165102	48478.6	11690.9	1565.02
2.25073	1000000	737608	348099	165417	48644.8	11751.9	1575.56
2.25407	1000000	737795	348456	165731	48811	11813.1	1586.15
2.2574	1000000	737982	348812	166045	48977.4	11874.4	1596.78
2.26073	1000000	738169	349168	166359	49143.9	11935.9	1607.44
2.26407	1000000	738355	349523	166672	49310.5	11997.6	1618.15
2.2674	1000000	738541	349877	166985	49477.3	12059.3	1628.89
2.27073	1000000	738726	350231	167298	49644.1	12121.2	1639.67
2.27407	1000000	738911	350585	167611	49811	12183.3	1650.49
2.2774	1000000	739096	350938	167923	49978.1	12245.5	1661.35
2.28073	1000000	739280	351290	168235	50145.2	12307.8	1672.25
2.28407	1000000	739463	351642	168547	50312.4	12370.3	1683.18
2.2874	1000000	739647	351993	168859	50479.8	12432.9	1694.15
2.29073	1000000	739830	352344	169170	50647.2	12495.6	1705.17
2.29407	1000000	740012	352694	169481	50814.8	12558.5	1716.22
2.2974	1000000	740195	353044	169792	50982.4	12621.6	1727.3
2.30073	1000000	740377	353393	170103	51150.2	12684.7	1738.43
2.30407	1000000	740558	353742	170414	51318	12748	1749.6
2.3074	1000000	740739	354090	170724	51486	12811.5	1760.8
2.31073	1000000	740920	354437	171034	51654	12875.1	1772.04
2.31407	1000000	741100	354784	171343	51822.2	12938.8	1783.32
2.3174	1000000	741280	355131	171653	51990.4	13002.6	1794.64
2.32073	1000000	741460	355477	171962	52158.7	13066.6	1805.99
2.32407	1000000	741639	355822	172271	52327.2	13130.8	1817.38
2.3274	1000000	741818	356167	172580	52495.7	13195	1828.81
2.33073	1000000	741996	356511	172888	52664.3	13259.4	1840.28
2.33407	1000000	742174	356855	173196	52833	13324	1851.79
2.3374	1000000	742352	357198	173504	53001.8	13388.6	1863.33
2.34073	1000000	742529	357541	173812	53170.7	13453.4	1874.92
2.34407	1000000	742706	357883	174119	53339.7	13518.4	1886.54
2.3474	1000000	742883	358225	174427	53508.7	13583.4	1898.19
2.35073	1000000	743059	358566	174734	53677.9	13648.7	1909.89
2.35407	1000000	743235	358907	175040	53847.1	13714	1921.62
2.3574	1000000	743410	359247	175347	54016.4	13779.5	1933.39
2.36073	1000000	743585	359587	175653	54185.9	13845.1	1945.2
2.36407	1000000	743760	359926	175959	54355.4	13910.8	1957.05
2.3674	1000000	743934	360265	176265	54524.9	13976.7	1968.93
2.37073	1000000	744108	360603	176570	54694.6	14042.7	1980.85
2.37407	1000000	744282	360940	176875	54864.4	14108.8	1992.81
2.3774	1000000	744456	361278	177180	55034.2	14175.1	2004.8
2.38073	1000000	744629	361614	177485	55204.1	14241.5	2016.83
2.38407	1000000	744801	361950	177790	55374.1	14308	2028.9
2.3874	1000000	744973	362286	178094	55544.2	14374.6	2041.01
2.39073	1000000	745145	362621	178398	55714.3	14441.4	2053.15
2.39407	1000000	745317	362955	178701	55884.6	14508.3	2065.33
2.3974	1000000	745488	363289	179005	56054.9	14575.4	2077.55
2.40073	1000000	745659	363623	179308	56225.3	14642.5	2089.8
2.40407	1000000	745830	363956	179611	56395.8	14709.8	2102.09
2.4074	1000000	746000	364289	179914	56566.3	14777.2	2114.42
2.41073	1000000	746170	364621	180216	56736.9	14844.8	2126.78
2.41407	1000000	746339	364952	180519	56907.6	14912.5	2139.18
2.4174	1000000	746508	365283	180821	57078.4	14980.3	2151.62
2.42073	1000000	746677	365614	181122	57249.2	15048.2	2164.1
2.42407	1000000	746846	365944	181424	57420.2	15116.2	2176.61
2.4274	1000000	747014	366274	181725	57591.2	15184.4	2189.15
2.43073	1000000	747182	366603	182026	57762.2	15252.7	2201.74
2.43407	1000000	747349	366931	182327	57933.3	15321.1	2214.36
2.4374	1000000	747516	367259	182627	58104.5	15389.7	2227.01
2.44073	1000000	747683	367587	182928	58275.8	15458.4	2239.71
2.44407	1000000	747850	367914	183228	58447.2	15527.2	2252.44
2.4474	1000000	748016	368241	183527	58618.6	15596.1	2265.2
2.45073	1000000	748182	368567	183827	58790	15665.1	2278
2.45407	1000000	748347	368893	184126	58961.6	15734.3	2290.84
2.4574	1000000	748512	369218	184425	59133.2	15803.6	2303.71
2.46073	1000000	748677	369543	184724	59304.9	15873	2316.62
2.46407	1000000	748842	369867	185022	59476.6	15942.5	2329.57
2.4674	1000000	749006	370191	185321	59648.4	16012.2	2342.55
2.47073	1000000	749170	370514	185619	59820.3	16082	2355.56
2.47407	1000000	749333	370837	185916	59992.2	16151.9	2368.61
2.4774	1000000	749497	371159	186214	60164.2	16221.9	2381.7
2.48073	1000000	749659	371481	186511	60336.3	16292	2394.83
2.48407	1000000	749822	371802	186808	60508.4	16362.3	2407.98
2.4874	1000000	749984	372123	187105	60680.6	16432.6	2421.18
2.49073	1000000	750146	372444	187402	60852.8	16503.1	2434.41
2.49407	1000000	750308	372763	187698	61025.1	16573.7	2447.67
2.4974	1000000	750469	373083	187994	61197.5	16644.5	2460.97
2.50073	1000000	750630	373402	188290	61369.9	16715.3	2474.31
2.50407	1000000	750791	373721	188585	61542.4	16786.3	2487.68
2.5074	1000000	750951	374039	188880	61714.9	16857.3	2501.08
2.51073	1000000	751111	374356	189175	61887.5	16928.5	2514.53
2.51407	1000000	751271	374674	189470	62060.1	16999.8	2528
2.5174	1000000	751431	374990	189765	62232.8	17071.3	2541.51
2.52073	1000000	751590	375306	190059	62405.6	17142.8	2555.06
2.52407	1000000	751749	375622	190353	62578.4	17214.5	2568.64
2.5274	1000000	751907	375938	190647	62751.2	17286.2	2582.25
2.53073	1000000	752065	376252	190941	62924.1	17358.1	2595.9
2.53407	1000000	752223	376567	191234	63097.1	17430.1	2609.58
2.5374	1000000	752381	376881	191527	63270.1	17502.2	2623.3
2.54073	1000000	752538	377194	191820	63443.2	17574.5	2637.06
2.54407	1000000	752695	377507	192112	63616.3	17646.8	2650.84
2.5474	1000000	752852	377820	192405	63789.4	17719.2	2664.66
2.55073	1000000	753008	378132	192697	63962.7	17791.8	2678.52
2.55407	1000000	753165	378444	192989	64135.9	17864.5	2692.41
2.5574	1000000	753320	378755	193280	64309.2	17937.3	2706.33
2.56073	1000000	753476	379066	193572	64482.6	18010.2	2720.29
2.56407	1000000	753631	379376	193863	64656	18083.2	2734.28
2.5674	1000000	753786	379686	194154	64829.4	18156.3	2748.31
2.57073	1000000	753941	379996	194444	65002.9	18229.5	2762.37
2.57407	1000000	754095	380305	194734	65176.5	18302.8	2776.46
2.5774	1000000	754249	380613	195025	65350.1	18376.3	2790.59
2.58073	1000000	754403	380922	195314	65523.7	18449.8	2804.75
2.58407	1000000	754557	381229	195604	65697.4	18523.5	2818.95
2.5874	1000000	754710	381537	195894	65871.1	18597.3	2833.18
2.59073	1000000	754863	381843	196183	66044.8	18671.1	2847.44
2.59407	1000000	755015	382150	196472	66218.6	18745.1	2861.73
2.5974	1000000	755168	382456	196760	66392.5	18819.2	2876.06
2.60073	1000000	755320	382761	197049	66566.4	18893.4	2890.42
2.60407	1000000	755472	383066	197337	66740.3	18967.7	2904.82
2.6074	1000000	755623	383371	197625	66914.2	19042.1	2919.24
2.61073	1000000	755774	383675	197912	67088.2	19116.7	2933.7
2.61407	1000000	755925	383979	198200	67262.3	19191.3	2948.2
2.6174	1000000	756076	384283	198487	67436.4	19266	2962.72
2.62073	1000000	756226	384586	198774	67610.5	19340.8	2977.28
2.62407	1000000	756376	384888	199061	67784.6	19415.8	2991.88
2.6274	1000000	756526	385190	199347	67958.8	19490.8	3006.5
2.63073	1000000	756676	385492	199633	68133	19565.9	3021.16
2.63407	1000000	756825	385793	199919	68307.3	19641.2	3035.85
2.6374	1000000	756974	386094	200205	68481.6	19716.5	3050.57
2.64073	1000000	757123	386394	200490	68655.9	19792	3065.32
2.64407	1000000	757271	386694	200776	68830.3	19867.5	3080.11
2.6474	1000000	757419	386994	201061	69004.6	19943.2	3094.93
2.65073	1000000	757567	387293	201345	69179.1	20018.9	3109.78
2.65407	1000000	757715	387592	201630	69353.5	20094.8	3124.66
2.6574	1000000	757862	387890	201914	69528	20170.7	3139.58
2.66073	1000000	758009	388188	202198	69702.5	20246.8	3154.53
2.66407	1000000	758156	388485	202482	69877.1	20323	3169.51
2.6674	1000000	758303	388782	202765	70051.7	20399.2	3184.52
2.67073	1000000	758449	389079	203049	70226.3	20475.6	3199.56
2.67407	1000000	758595	389375	203332	70400.9	20552	3214.64
2.6774	1000000	758741	389671	203615	70575.6	20628.6	3229.74
2.68073	1000000	758886	389966	203897	70750.3	20705.2	3244.88
2.68407	1000000	759031	390261	204179	70925	20782	3260.05
2.6874	1000000	759176	390556	204462	71099.7	20858.8	3275.25
2.69073	1000000	759321	390850	204743	71274.5	20935.7	3290.48
2.69407	1000000	759466	391144	205025	71449.3	21012.8	3305.74
2.6974	1000000	759610	391437	205306	71624.2	21089.9	3321.04
2.70073	1000000	759754	391730	205587	71799	21167.1	3336.36
2.70407	1000000	759897	392022	205868	71973.9	21244.5	3351.72
2.7074	1000000	760041	392314	206149	72148.8	21321.9	3367.1
2.71073	1000000	760184	392606	206429	72323.7	21399.4	3382.52
2.71407	1000000	760327	392897	206709	72498.7	21477	3397.97
2.7174	1000000	760469	393188	206989	72673.6	21554.7	3413.45
2.72073	1000000	760612	393479	207269	72848.6	21632.5	3428.96
2.72407	1000000	760754	393769	207549	73023.6	21710.4	3444.5
2.7274	1000000	760896	394059	207828	73198.7	21788.4	3460.07
2.73073	1000000	761037	394348	208107	73373.7	21866.5	3475.67
2.73407	1000000	761179	394637	208385	73548.8	21944.6	3491.3
2.7374	1000000	761320	394925	208664	73723.9	22022.9	3506.96
2.74073	1000000	761461	395213	208942	73899	22101.2	3522.66
2.74407	1000000	761601	395501	209220	74074.1	22179.7	3538.38
2.7474	1000000	761742	395788	209498	74249.3	22258.2	3554.13
2.75073	1000000	761882	396075	209775	74424.5	22336.8	3569.91
2.75407	1000000	762022	396362	210053	74599.6	22415.5	3585.72
2.7574	1000000	762161	396648	210330	74774.9	22494.3	3601.56
2.76073	1000000	762301	396934	210607	74950.1	22573.2	3617.43
2.76407	1000000	762440	397219	210883	75125.3	22652.2	3633.34
2.7674	1000000	762579	397504	211159	75300.6	22731.3	3649.27
2.77073	1000000	762718	397789	211435	75475.8	22810.4	3665.22
2.77407	1000000	762856	398073	211711	75651.1	22889.7	3681.21
2.7774	1000000	762994	398357	211987	75826.4	22969	3697.23
2.78073	1000000	763132	398640	212262	76001.7	23048.5	3713.28
2.78407	1000000	763270	398923	212537	76177	23128	3729.36
2.7874	1000000	763407	399206	212812	76352.4	23207.6	3745.46
2.79073	1000000	763544	399488	213087	76527.7	23287.2	3761.6
2.79407	1000000	763681	399770	213362	76703.1	23367	3777.76
2.7974	1000000	763818	400052	213636	76878.5	23446.9	3793.95
2.80073	1000000	763955	400333	213910	77053.8	23526.8	3810.17
2.80407	1000000	764091	400613	214183	77229.2	23606.8	3826.42
2.8074	1000000	764227	400894	214457	77404.6	23686.9	3842.7
2.81073	1000000	764363	401174	214730	77580.1	23767.1	3859.01
2.81407	1000000	764498	401453	215003	77755.5	23847.4	3875.34
2.8174	1000000	764634	401733	215276	77930.9	23927.8	3891.71
2.82073	1000000	764769	402012	215548	78106.4	24008.2	3908.1
2.82407	1000000	764904	402290	215821	78281.8	24088.7	3924.52
2.8274	1000000	765038	402568	216093	78457.3	24169.4	3940.97
2.83073	1000000	765173	402846	216365	78632.7	24250	3957.45
2.83407	1000000	765307	403123	216636	78808.2	24330.8	3973.95
2.8374	1000000	765441	403400	216908	78983.7	24411.7	3990.48
2.84073	1000000	765574	403677	217179	79159.2	24492.6	4007.04
2.84407	1000000	765708	403953	217450	79334.6	24573.6	4023.63
2.8474	1000000	765841	404229	217720	79510.1	24654.7	4040.25
2.85073	1000000	765974	404505	217991	79685.6	24735.9	4056.89
2.85407	1000000	766107	404780	218261	79861.1	24817.2	4073.56
2.8574	1000000	766240	405055	218531	80036.6	24898.5	4090.26
2.86073	1000000	766372	405329	218801	80212.2	24979.9	4106.98
2.86407	1000000	766504	405603	219070	80387.7	25061.4	4123.73
2.8674	1000000	766636	405877	219340	80563.2	25143	4140.51
2.87073	1000000	766768	406150	219609	80738.7	25224.6	4157.32
2.87407	1000000	766899	406423	219877	80914.2	25306.4	4174.15
2.8774	1000000	767030	406696	220146	81089.8	25388.2	4191.02
2.88073	1000000	767161	406968	220414	81265.3	25470.1	4207.9
2.88407	1000000	767292	407240	220682	81440.8	25552	4224.82
2.8874	1000000	767423	407511	220950	81616.3	25634.1	4241.76
2.89073	1000000	767553	407783	221218	81791.9	25716.2	4258.73
2.89407	1000000	767683	408053	221485	81967.4	25798.4	4275.72
2.8974	1000000	767813	408324	221753	82142.9	25880.6	4292.74
2.90073	1000000	767943	408594	222020	82318.4	25963	4309.79
2.90407	1000000	768072	408864	222286	82494	26045.4	4326.86
2.9074	1000000	768202	409133	222553	82669.5	26127.9	4343.96
2.91073	1000000	768331	409402	222819	82845	26210.4	4361.09
2.91407	1000000	768459	409671	223085	83020.5	26293.1	4378.24
2.9174	1000000	768588	409939	223351	83196	26375.8	4395.42
2.92073	1000000	768716	410207	223616	83371.5	26458.6	4412.62
2.92407	1000000	768845	410475	223882	83547	26541.4	4429.85
2.9274	1000000	768973	410742	224147	83722.5	26624.4	4447.1
2.93073	1000000	769100	411009	224412	83898	26707.4	4464.38
2.93407	1000000	769228	411275	224676	84073.5	26790.4	4481.69
2.9374	1000000	769355	411542	224941	84249	26873.6	4499.02
2.94073	1000000	769482	411807	225205	84424.5	26956.8	4516.38
2.94407	1000000	769609	412073	225469	84600	27040.1	4533.76
2.9474	1000000	769736	412338	225733	84775.4	27123.4	4551.17
2.95073	1000000	769863	412603	225996	84950.9	27206.9	4568.6
2.95407	1000000	769989	412867	226260	85126.3	27290.4	4586.06
2.9574	1000000	770115	413132	226523	85301.8	27373.9	4603.55
2.96073	1000000	770241	413395	226786	85477.2	27457.6	4621.05
2.96407	1000000	770367	413659	227048	85652.7	27541.3	4638.59
2.9674	1000000	770492	413922	227311	85828.1	27625.1	4656.14
2.97073	1000000	770617	414185	227573	86003.5	27708.9	4673.73
2.97407	1000000	770742	414447	227835	86178.9	27792.8	4691.33
2.9774	1000000	770867	414709	228096	86354.3	27876.8	4708.96
2.98073	1000000	770992	414971	228358	86529.7	27960.8	4726.62
2.98407	1000000	771116	415232	228619	86705	28044.9	4744.3
2.9874	1000000	771241	415493	228880	86880.4	28129.1	4762.01
2.99073	1000000	771365	415754	229141	87055.8	28213.4	4779.73
2.99407	1000000	771489	416015	229402	87231.1	28297.7	4797.49
2.9974	1000000	771612	416275	229662	87406.4	28382.1	4815.26
3.00073	1000000	771736	416534	229922	87581.7	28466.5	4833.07
3.00407	1000000	771859	416794	230182	87757.1	28551	4850.89
3.0074	1000000	771982	417053	230442	87932.3	28635.6	4868.74
3.01073	1000000	772105	417311	230701	88107.6	28720.2	4886.61
3.01407	1000000	772228	417570	230960	88282.9	28804.9	4904.51
3.0174	1000000	772350	417828	231219	88458.1	28889.7	4922.43
3.02073	1000000	772472	418086	231478	88633.4	28974.5	4940.37
3.02407	1000000	772594	418343	231737	88808.6	29059.4	4958.34
3.0274	1000000	772716	418600	231995	88983.8	29144.4	4976.33
3.03073	1000000	772838	418857	232253	89159	29229.4	4994.34
3.03407	1000000	772959	419113	232511	89334.2	29314.4	5012.38
3.0374	1000000	773081	419369	232769	89509.3	29399.6	5030.44
3.04073	1000000	773202	419625	233026	89684.5	29484.8	5048.52
3.04407	1000000	773323	419880	233283	89859.6	29570.1	5066.62
3.0474	1000000	773443	420136	233540	90034.7	29655.4	5084.75
3.05073	1000000	773564	420390	233797	90209.8	29740.8	5102.9
3.05407	1000000	773684	420645	234054	90384.9	29826.2	5121.08
3.0574	1000000	773804	420899	234310	90560	29911.7	5139.27
3.06073	1000000	773924	421153	234566	90735	29997.3	5157.49
3.06407	1000000	774044	421406	234822	90910	30082.9	5175.73
3.0674	1000000	774164	421659	235078	91085.1	30168.6	5194
3.07073	1000000	774283	421912	235333	91260	30254.3	5212.28
3.07407	1000000	774402	422165	235588	91435	30340.1	5230.59
3.0774	1000000	774521	422417	235843	91610	30426	5248.92
3.08073	1000000	774640	422669	236098	91784.9	30511.9	5267.27
3.08407	1000000	774759	422920	236353	91959.8	30597.9	5285.65
3.0874	1000000	774877	423172	236607	92134.7	30683.9	5304.04
3.09073	1000000	774995	423422	236861	92309.6	30770	5322.46
3.09407	1000000	775114	423673	237115	92484.4	30856.1	5340.9
3.0974	1000000	775231	423923	237369	92659.2	30942.3	5359.36
3.10073	1000000	775349	424173	237622	92834	31028.6	5377.84
3.10407	1000000	775467	424423	237876	93008.8	31114.9	5396.35
3.1074	1000000	775584	424672	238129	93183.6	31201.3	5414.87
3.11073	1000000	775701	424921	238382	93358.3	31287.7	5433.42
3.11407	1000000	775818	425170	238634	93533	31374.2	5451.99
3.1174	1000000	775935	425419	238887	93707.7	31460.7	5470.58
3.12073	1000000	776051	425667	239139	93882.4	31547.3	5489.19
3.12407	1000000	776168	425914	239391	94057	31634	5507.82
3.1274	1000000	776284	426162	239642	94231.7	31720.7	5526.47
3.13073	1000000	776400	426409	239894	94406.2	31807.4	5545.15
3.13407	1000000	776516	426656	240145	94580.8	31894.2	5563.84
3.1374	1000000	776632	426902	240396	94755.4	31981.1	5582.56
3.14073	1000000	776747	427149	240647	94929.9	32068	5601.29
3.14407	1000000	776863	427395	240898	95104.4	32154.9	5620.05
3.1474	1000000	776978	427640	241148	95278.9	32241.9	5638.82
3.15073	1000000	777093	427886	241399	95453.3	32329	5657.62
3.15407	1000000	777208	428131	241649	95627.7	32416.1	5676.44
3.1574	1000000	777322	428375	241898	95802.1	32503.3	5695.28
3.16073	1000000	777437	428620	242148	95976.5	32590.5	5714.13
3.16407	1000000	777551	428864	242397	96150.8	32677.8	5733.01
3.1674	1000000	777665	429108	242646	96325.1	32765.1	5751.91
3.17073	1000000	777779	429351	242895	96499.4	32852.4	5770.83
3.17407	1000000	777893	429594	243144	96673.7	32939.9	5789.77
3.1774	1000000	778007	429837	243393	96847.9	33027.3	5808.72
3.18073	1000000	778120	430080	243641	97022.1	33114.8	5827.7
3.18407	1000000	778233	430322	243889	97196.3	33202.4	5846.7
3.1874	1000000	778346	430564	244137	97370.4	33290	5865.71
3.19073	1000000	778459	430806	244384	97544.5	33377.7	5884.75
3.19407	1000000	778572	431047	244632	97718.6	33465.4	5903.8
3.1974	1000000	778684	431288	244879	97892.6	33553.1	5922.88
3.20073	1000000	778797	431529	245126	98066.7	33640.9	5941.97
3.20407	1000000	778909	431770	245373	98240.6	33728.8	5961.08
3.2074	1000000	779021	432010	245620	98414.6	33816.7	5980.22
3.21073	1000000	779133	432250	245866	98588.5	33904.6	5999.37
3.21407	1000000	779245	432490	246112	98762.4	33992.6	6018.54
3.2174	1000000	779356	432729	246358	98936.3	34080.6	6037.72
3.22073	1000000	779468	432968	246604	99110.1	34168.7	6056.93
3.22407	1000000	779579	433207	246849	99283.9	34256.8	6076.16
3.2274	1000000	779690	433445	247095	99457.7	34345	6095.4
3.23073	1000000	779801	433683	247340	99631.5	34433.2	6114.67
3.23407	1000000	779911	433921	247585	99805.2	34521.5	6133.95
3.2374	1000000	780022	434159	247829	99978.8	34609.8	6153.25
3.24073	1000000	780132	434396	248074	100152	34698.1	6172.56
3.24407	1000000	780243	434633	248318	100326	34786.5	6191.9
3.2474	1000000	780353	434870	248562	100500	34875	6211.26
3.25073	1000000	780463	435107	248806	100673	34963.4	6230.63
3.25407	1000000	780572	435343	249050	100847	35051.9	6250.02
3.2574	1000000	780682	435579	249293	101020	35140.5	6269.43
3.26073	1000000	780791	435814	249536	101194	35229.1	6288.85
3.26407	1000000	780900	436050	249779	101367	35317.8	6308.3
3.2674	1000000	781009	436285	250022	101540	35406.4	6327.76
3.27073	1000000	781118	436519	250265	101714	35495.2	6347.24
3.27407	1000000	781227	436754	250507	101887	35583.9	6366.74
3.2774	1000000	781336	436988	250749	102060	35672.8	6386.25
3.28073	1000000	781444	437222	250991	102233	35761.6	6405.78
3.28407	1000000	781552	437455	251233	102407	35850.5	6425.33
3.2874	1000000	781661	437689	251475	102580	35939.4	6444.9
3.29073	1000000	781768	437922	251716	102753	36028.4	6464.48
3.29407	1000000	781876	438155	251957	102926	36117.4	6484.08
3.2974	1000000	781984	438387	252198	103099	36206.5	6503.7
3.30073	1000000	782091	438619	252439	103272	36295.6	6523.33
3.30407	1000000	782199	438851	252679	103445	36384.7	6542.99
3.3074	1000000	782306	439083	252920	103618	36473.8	6562.65
3.31073	1000000	782413	439314	253160	103791	36563.1	6582.34
3.31407	1000000	782520	439546	253400	103964	36652.3	6602.04
3.3174	1000000	782626	439776	253639	104136	36741.6	6621.76
3.32073	1000000	782733	440007	253879	104309	36830.9	6641.49
3.32407	1000000	782839	440237	254118	104482	36920.2	6661.24
3.3274	1000000	782945	440467	254357	104655	37009.6	6681.01
3.33073	1000000	783052	440697	254596	104827	37099.1	6700.8
3.33407	1000000	783157	440926	254835	105000	37188.5	6720.6
3.3374	1000000	783263	441156	255073	105173	37278	6740.41
3.34073	1000000	783369	441384	255312	105345	37367.6	6760.24
3.34407	1000000	783474	441613	255550	105518	37457.1	6780.09
3.3474	1000000	783580	441841	255788	105690	37546.7	6799.96
3.35073	1000000	783685	442070	256025	105862	37636.4	6819.84
3.35407	1000000	783790	442297	256263	106035	37726.1	6839.73
3.3574	1000000	783895	442525	256500	106207	37815.8	6859.64
3.36073	1000000	783999	442752	256737	106379	37905.5	6879.57
3.36407	1000000	784104	442979	256974	106552	37995.3	6899.51
3.3674	1000000	784208	443206	257211	106724	38085.1	6919.47
3.37073	1000000	784312	443432	257447	106896	38175	6939.44
3.37407	1000000	784416	443659	257683	107068	38264.8	6959.43
3.3774	1000000	784520	443885	257919	107240	38354.7	6979.43
3.38073	1000000	784624	444110	258155	107412	38444.7	6999.45
3.38407	1000000	784728	444336	258391	107584	38534.7	7019.49
3.3874	1000000	784831	444561	258626	107756	38624.7	7039.54
3.39073	1000000	784935	444786	258862	107928	38714.7	7059.6
3.39407	1000000	785038	445010	259097	108100	38804.8	7079.68
3.3974	1000000	785141	445235	259331	108272	38894.9	7099.77
3.40073	1000000	785244	445459	259566	108444	38985	7119.88
3.40407	1000000	785347	445683	259801	108615	39075.2	7140
3.4074	1000000	785449	445906	260035	108787	39165.4	7160.14
3.41073	1000000	785552	446129	260269	108959	39255.6	7180.29
3.41407	1000000	785654	446352	260503	109130	39345.9	7200.46
3.4174	1000000	785756	446575	260736	109302	39436.2	7220.64
3.42073	1000000	785858	446798	260970	109473	39526.5	7240.84
3.42407	1000000	785960	447020	261203	109645	39616.8	7261.05
3.4274	1000000	786062	447242	261436	109816	39707.2	7281.27
3.43073	1000000	786163	447464	261669	109987	39797.6	7301.51
3.43407	1000000	786265	447685	261902	110159	39888.1	7321.76
3.4374	1000000	786366	447906	262134	110330	39978.5	7342.02
3.44073	1000000	786467	448127	262366	110501	40069	7362.3
3.44407	1000000	786568	448348	262598	110672	40159.5	7382.6
3.4474	1000000	786669	448568	262830	110844	40250.1	7402.9
3.45073	1000000	786770	448789	263062	111015	40340.7	7423.22
3.45407	1000000	786870	449009	263293	111186	40431.3	7443.56
3.4574	1000000	786971	449228	263525	111357	40521.9	7463.91
3.46073	1000000	787071	449448	263756	111528	40612.5	7484.27
3.46407	1000000	787171	449667	263986	111699	40703.2	7504.64
3.4674	1000000	787271	449886	264217	111869	40793.9	7525.03
3.47073	1000000	787371	450104	264448	112040	40884.7	7545.43
3.47407	1000000	787471	450323	264678	112211	40975.4	7565.85
3.4774	1000000	787571	450541	264908	112382	41066.2	7586.28
3.48073	1000000	787670	450759	265138	112552	41157	7606.72
3.48407	1000000	787770	450976	265368	112723	41247.9	7627.17
3.4874	1000000	787869	451194	265597	112893	41338.7	7647.64
3.49073	1000000	787968	451411	265826	113064	41429.6	7668.12
3.49407	1000000	788067	451628	266056	113234	41520.5	7688.61
3.4974	1000000	788165	451845	266285	113405	41611.4	7709.11
3.50073	1000000	788264	452061	266513	113575	41702.4	7729.63
3.50407	1000000	788363	452277	266742	113746	41793.4	7750.16
3.5074	1000000	788461	452493	266970	113916	41884.4	7770.7
3.51073	1000000	788559	452709	267198	114086	41975.4	7791.26
3.51407	1000000	788657	452924	267426	114256	42066.5	7811.82
3.5174	1000000	788755	453139	267654	114426	42157.5	7832.4
3.52073	1000000	788853	453354	267882	114596	42248.6	7853
3.52407	1000000	788951	453569	268109	114766	42339.8	7873.6
3.5274	1000000	789048	453783	268336	114936	42430.9	7894.22
3.53073	1000000	789146	453997	268563	115106	42522.1	7914.84
3.53407	1000000	789243	454211	268790	115276	42613.3	7935.48
3.5374	1000000	789340	454425	269017	115446	42704.5	7956.14
3.54073	1000000	789437	454638	269243	115616	42795.7	7976.8
3.54407	1000000	789534	454851	269469	115785	42886.9	7997.48
3.5474	1000000	789631	455064	269695	115955	42978.2	8018.16
3.55073	1000000	789728	455277	269921	116125	43069.5	8038.86
3.55407	1000000	789824	455490	270147	116294	43160.8	8059.57
3.5574	1000000	789921	455702	270372	116464	43252.1	8080.29
3.56073	1000000	790017	455914	270597	116633	43343.5	8101.03
3.56407	1000000	790113	456125	270823	116802	43434.9	8121.77
3.5674	1000000	790209	456337	271047	116972	43526.3	8142.53
3.57073	1000000	790305	456548	271272	117141	43617.7	8163.3
3.57407	1000000	790400	456759	271497	117310	43709.1	8184.07
3.5774	1000000	790496	456970	271721	117479	43800.5	8204.86
3.58073	1000000	790591	457180	271945	117649	43892	8225.66
3.58407	1000000	790687	457391	272169	117818	43983.5	8246.47
3.5874	1000000	790782	457601	272393	117987	44075	8267.3
3.59073	1000000	790877	457811	272616	118156	44166.5	8288.13
3.59407	1000000	790972	458020	272840	118324	44258	8308.97
3.5974	1000000	791067	458230	273063	118493	44349.6	8329.83
3.60073	1000000	791161	458439	273286	118662	44441.2	8350.69
3.60407	1000000	791256	458648	273509	118831	44532.8	8371.57
3.6074	1000000	791350	458856	273731	118999	44624.4	8392.46
3.61073	1000000	791445	459065	273954	119168	44716	8413.35
3.61407	1000000	791539	459273	274176	119337	44807.6	8434.26
3.6174	1000000	791633	459481	274398	119505	44899.3	8455.18
3.62073	1000000	791727	459688	274620	119674	44990.9	8476.11
3.62407	1000000	791821	459896	274842	119842	45082.6	8497.04
3.6274	1000000	791914	460103	275063	120010	45174.3	8517.99
3.63073	1000000	792008	460310	275285	120179	45266	8538.95
3.63407	1000000	792101	460517	275506	120347	45357.8	8559.92
3.6374	1000000	792195	460723	275727	120515	45449.5	8580.89
3.64073	1000000	792288	460930	275947	120683	45541.3	8601.88
3.64407	1000000	792381	461136	276168	120851	45633.1	8622.88
3.6474	1000000	792474	461342	276388	121019	45724.9	8643.89
3.65073	1000000	792567	461547	276609	121187	45816.7	8664.9
3.65407	1000000	792659	461753	276829	121355	45908.5	8685.93
3.6574	1000000	792752	461958	277048	121523	46000.3	8706.97
3.66073	1000000	792844	462163	277268	121691	46092.2	8728.01
3.66407	1000000	792937	462367	277488	121858	46184	8749.07
3.6674	1000000	793029	462572	277707	122026	46275.9	8770.13
3.67073	1000000	793121	462776	277926	122194	46367.8	8791.21
3.67407	1000000	793213	462980	278145	122361	46459.7	8812.29
3.6774	1000000	793305	463184	278364	122529	46551.6	8833.38
3.68073	1000000	793396	463387	278582	122696	46643.5	8854.48
3.68407	1000000	793488	463591	278801	122864	46735.4	8875.59
3.6874	1000000	793579	463794	279019	123031	46827.4	8896.71
3.69073	1000000	793671	463997	279237	123198	46919.3	8917.84
3.69407	1000000	793762	464199	279455	123365	47011.3	8938.98
3.6974	1000000	793853	464402	279672	123532	47103.3	8960.12
3.70073	1000000	793944	464604	279890	123700	47195.3	8981.28
3.70407	1000000	794035	464806	280107	123867	47287.3	9002.44
3.7074	1000000	794126	465008	280324	124034	47379.3	9023.61
3.71073	1000000	794216	465209	280541	124200	47471.3	9044.8
3.71407	1000000	794307	465411	280758	124367	47563.4	9065.98
3.7174	1000000	794397	465612	280974	124534	47655.4	9087.18
3.72073	1000000	794487	465813	281191	124701	47747.5	9108.39
3.72407	1000000	794578	466013	281407	124867	47839.5	9129.6
3.7274	1000000	794668	466214	281623	125034	47931.6	9150.82
3.73073	1000000	794757	466414	281839	125201	48023.7	9172.06
3.73407	1000000	794847	466614	282054	125367	48115.8	9193.29
3.7374	1000000	794937	466814	282270	125533	48207.9	9214.54
3.74073	1000000	795027	467013	282485	125700	48300	9235.8
3.74407	1000000	795116	467213	282700	125866	48392.1	9257.06
3.7474	1000000	795205	467412	282915	126032	48484.2	9278.33
3.75073	1000000	795295	467611	283130	126199	48576.3	9299.61
3.75407	1000000	795384	467809	283344	126365	48668.5	9320.9
3.7574	1000000	795473	468008	283559	126531	48760.6	9342.19
3.76073	1000000	795561	468206	283773	126697	48852.8	9363.49
3.76407	1000000	795650	468404	283987	126863	48945	9384.8
3.7674	1000000	795739	468602	284201	127029	49037.1	9406.12
3.77073	1000000	795827	468799	284414	127194	49129.3	9427.44
3.77407	1000000	795916	468997	284628	127360	49221.5	9448.78
3.7774	1000000	796004	469194	284841	127526	49313.7	9470.11
3.78073	1000000	796092	469391	285054	127691	49405.9	9491.46
3.78407	1000000	796180	469588	285267	127857	49498.1	9512.82
3.7874	1000000	796268	469784	285480	128022	49590.3	9534.18
3.79073	1000000	796356	469981	285693	128188	49682.5	9555.55
3.79407	1000000	796444	470177	285905	128353	49774.7	9576.92
3.7974	1000000	796532	470373	286117	128519	49867	9598.3
3.80073	1000000	796619	470568	286329	128684	49959.2	9619.69
3.80407	1000000	796706	470764	286541	128849	50051.4	9641.09
3.8074	1000000	796794	470959	286753	129014	50143.7	9662.49
3.81073	1000000	796881	471154	286965	129179	50235.9	9683.9
3.81407	1000000	796968	471349	287176	129344	50328.2	9705.32
3.8174	1000000	797055	471543	287387	129509	50420.4	9726.74
3.82073	1000000	797142	471738	287598	129674	50512.7	9748.17
3.82407	1000000	797229	471932	287809	129839	50605	9769.61
3.8274	1000000	797315	472126	288020	130004	50697.2	9791.05
3.83073	1000000	797402	472320	288230	130168	50789.5	9812.5
3.83407	1000000	797488	472513	288440	130333	50881.8	9833.96
3.8374	1000000	797574	472707	288651	130497	50974.1	9855.42
3.84073	1000000	797661	472900	288861	130662	51066.3	9876.89
3.84407	1000000	797747	473093	289070	130826	51158.6	9898.37
3.8474	1000000	797833	473285	289280	130991	51250.9	9919.85
3.85073	1000000	797918	473478	289489	131155	51343.2	9941.34
3.85407	1000000	798004	473670	289699	131319	51435.5	9962.83
3.8574	1000000	798090	473862	289908	131483	51527.8	9984.33
3.86073	1000000	798175	474054	290117	131647	51620.1	10005.8
3.86407	1000000	798261	474246	290325	131811	51712.4	10027.3
3.8674	1000000	798346	474438	290534	131975	51804.7	10048.9
3.87073	1000000	798431	474629	290742	132139	51897	10070.4
3.87407	1000000	798516	474820	290951	132303	51989.3	10091.9
3.8774	1000000	798601	475011	291159	132467	52081.6	10113.4
3.88073	1000000	798686	475201	291367	132631	52173.9	10135
3.88407	1000000	798771	475392	291574	132794	52266.2	10156.5
3.8874	1000000	798856	475582	291782	132958	52358.5	10178.1
3.89073	1000000	798940	475772	291989	133121	52450.8	10199.6
3.89407	1000000	799025	475962	292196	133285	52543.1	10221.2
3.8974	1000000	799109	476152	292404	133448	52635.4	10242.8
3.90073	1000000	799193	476341	292610	133612	52727.8	10264.3
3.90407	1000000	799278	476530	292817	133775	52820.1	10285.9
3.9074	1000000	799362	476720	293024	133938	52912.4	10307.5
3.91073	1000000	799446	476908	293230	134101	53004.7	10329.1
3.91407	1000000	799529	477097	293436	134264	53097	10350.7
3.9174	1000000	799613	477285	293642	134427	53189.3	10372.3
3.92073	1000000	799697	477474	293848	134590	53281.6	10393.9
3.92407	1000000	799780	477662	294054	134753	53373.9	10415.5
3.9274	1000000	799864	477850	294259	134916	53466.2	10437.1
3.93073	1000000	799947	478037	294464	135078	53558.5	10458.7
3.93407	1000000	800030	478225	294670	135241	53650.8	10480.4
3.9374	1000000	800113	478412	294875	135404	53743.1	10502
3.94073	1000000	800196	478599	295079	135566	53835.4	10523.6
3.94407	1000000	800279	478786	295284	135729	53927.7	10545.3
3.9474	1000000	800362	478973	295489	135891	54020	10566.9
3.95073	1000000	800445	479159	295693	136053	54112.3	10588.5
3.95407	1000000	800527	479345	295897	136216	54204.6	10610.2
3.9574	1000000	800610	479531	296101	136378	54296.9	10631.9
3.96073	1000000	800692	479717	296305	136540	54389.2	10653.5
3.96407	1000000	800775	479903	296508	136702	54481.4	10675.2
3.9674	1000000	800857	480088	296712	136864	54573.7	10696.8
3.97073	1000000	800939	480274	296915	137026	54666	10718.5
3.97407	1000000	801021	480459	297118	137188	54758.3	10740.2
3.9774	1000000	801103	480644	297321	137349	54850.5	10761.9
3.98073	1000000	801185	480828	297524	137511	54942.8	10783.6
3.98407	1000000	801266	481013	297727	137673	55035	10805.3
3.9874	1000000	801348	481197	297929	137834	55127.3	10826.9
3.99073	1000000	801429	481381	298132	137996	55219.5	10848.6
3.99407	1000000	801511	481565	298334	138157	55311.8	10870.3
3.9974	1000000	801592	481749	298536	138319	55404	10892.1
4.00073	1000000	801673	481933	298738	138480	55496.3	10913.8
4.00407	1000000	801754	482116	298939	138641	55588.5	10935.5
4.0074	1000000	801835	482299	299141	138802	55680.7	10957.2
4.01073	1000000	801916	482482	299342	138963	55772.9	10978.9
4.01407	1000000	801997	482665	299543	139124	55865.2	11000.6
4.0174	1000000	802078	482848	299744	139285	55957.4	11022.4
4.02073	1000000	802158	483030	299945	139446	56049.6	11044.1
4.02407	1000000	802239	483212	300146	139607	56141.8	11065.8
4.0274	1000000	802319	483394	300346	139768	56234	11087.6
4.03073	1000000	802400	483576	300546	139928	56326.1	11109.3
4.03407	1000000	802480	483758	300747	140089	56418.3	11131
4.0374	1000000	802560	483939	300947	140250	56510.5	11152.8
4.04073	1000000	802640	484120	301146	140410	56602.7	11174.5
4.04407	1000000	802720	484301	301346	140570	56694.8	11196.3
4.0474	1000000	802800	484482	301546	140731	56787	11218.1
4.05073	1000000	802880	484663	301745	140891	56879.1	11239.8
4.05407	1000000	802959	484844	301944	141051	56971.3	11261.6
4.0574	1000000	803039	485024	302143	141211	57063.4	11283.3
4.06073	1000000	803118	485204	302342	141371	57155.5	11305.1
4.06407	1000000	803198	485384	302541	141531	57247.6	11326.9
4.0674	1000000	803277	485564	302739	141691	57339.8	11348.7
4.07073	1000000	803356	485743	302937	141851	57431.9	11370.4
4.07407	1000000	803435	485923	303136	142011	57524	11392.2
4.0774	1000000	803514	486102	303334	142170	57616	11414
4.08073	1000000	803593	486281	303532	142330	57708.1	11435.8
4.08407	1000000	803672	486460	303729	142490	57800.2	11457.6
4.0874	1000000	803750	486639	303927	142649	57892.2	11479.4
4.09073	1000000	803829	486817	304124	142809	57984.3	11501.2
4.09407	1000000	803908	486995	304321	142968	58076.3	11523
4.0974	1000000	803986	487174	304519	143127	58168.4	11544.7
4.10073	1000000	804064	487352	304715	143286	58260.4	11566.6
4.10407	1000000	804143	487529	304912	143445	58352.4	11588.4
4.1074	1000000	804221	487707	305109	143604	58444.4	11610.2
4.11073	1000000	804299	487884	305305	143763	58536.4	11632
4.11407	1000000	804377	488061	305502	143922	58628.4	11653.8
4.1174	1000000	804454	488238	305698	144081	58720.4	11675.6
4.12073	1000000	804532	488415	305894	144240	58812.4	11697.4
4.12407	1000000	804610	488592	306089	144399	58904.3	11719.2
4.1274	1000000	804688	488768	306285	144557	58996.3	11741
4.13073	1000000	804765	488945	306480	144716	59088.2	11762.9
4.13407	1000000	804842	489121	306676	144874	59180.1	11784.7
4.1374	1000000	804920	489297	306871	145033	59272	11806.5
4.14073	1000000	804997	489473	307066	145191	59363.9	11828.3
4.14407	1000000	805074	489648	307261	145349	59455.8	11850.1
4.1474	1000000	805151	489824	307455	145508	59547.7	11872
4.15073	1000000	805228	489999	307650	145666	59639.6	11893.8
4.15407	1000000	805305	490174	307844	145824	59731.5	11915.6
4.1574	1000000	805382	490349	308038	145982	59823.3	11937.5
4.16073	1000000	805458	490523	308233	146140	59915.1	11959.3
4.16407	1000000	805535	490698	308426	146297	60007	11981.1
4.1674	1000000	805611	490872	308620	146455	60098.8	12003
4.17073	1000000	805688	491047	308814	146613	60190.6	12024.8
4.17407	1000000	805764	491221	309007	146770	60282.4	12046.7
4.1774	1000000	805840	491394	309200	146928	60374.1	12068.5
4.18073	1000000	805917	491568	309393	147086	60465.9	12090.4
4.18407	1000000	805993	491741	309586	147243	60557.7	12112.2
4.1874	1000000	806069	491915	309779	147400	60649.4	12134
4.19073	1000000	806144	492088	309972	147557	60741.1	12155.9
4.19407	1000000	806220	492261	310164	147715	60832.9	12177.7
4.1974	1000000	806296	492434	310357	147872	60924.6	12199.6
4.20073	1000000	806371	492606	310549	148029	61016.2	12221.4
4.20407	1000000	806447	492779	310741	148186	61107.9	12243.3
4.2074	1000000	806522	492951	310933	148343	61199.6	12265.1
4.21073	1000000	806598	493123	311124	148499	61291.2	12287
4.21407	1000000	806673	493295	311316	148656	61382.9	12308.9
4.2174	1000000	806748	493466	311507	148813	61474.5	12330.7
4.22073	1000000	806823	493638	311698	148969	61566.1	12352.6
4.22407	1000000	806898	493809	311890	149126	61657.7	12374.4
4.2274	1000000	806973	493981	312080	149282	61749.3	12396.3
4.23073	1000000	807048	494152	312271	149439	61840.8	12418.1
4.23407	1000000	807123	494322	312462	149595	61932.4	12440
4.2374	1000000	807197	494493	312652	149751	62023.9	12461.9
4.24073	1000000	807272	494664	312843	149907	62115.4	12483.7
4.24407	1000000	807346	494834	313033	150064	62207	12505.6
4.2474	1000000	807421	495004	313223	150220	62298.4	12527.4
4.25073	1000000	807495	495174	313413	150376	62389.9	12549.3
4.25407	1000000	807569	495344	313602	150531	62481.4	12571.2
4.2574	1000000	807644	495514	313792	150687	62572.8	12593
4.26073	1000000	807718	495683	313981	150843	62664.3	12614.9
4.26407	1000000	807792	495852	314170	150999	62755.7	12636.8
4.2674	1000000	807865	496022	314359	151154	62847.1	12658.6
4.27073	1000000	807939	496191	314548	151310	62938.5	12680.5
4.27407	1000000	808013	496359	314737	151465	63029.8	12702.3
4.2774	1000000	808087	496528	314926	151620	63121.2	12724.2
4.28073	1000000	808160	496697	315114	151776	63212.5	12746.1
4.28407	1000000	808234	496865	315303	151931	63303.9	12767.9
4.2874	1000000	808307	497033	315491	152086	63395.2	12789.8
4.29073	1000000	808380	497201	315679	152241	63486.4	12811.7
4.29407	1000000	808453	497369	315867	152396	63577.7	12833.5
4.2974	1000000	808527	497537	316054	152551	63669	12855.4
4.30073	1000000	808600	497704	316242	152706	63760.2	12877.3
4.30407	1000000	808673	497871	316429	152860	63851.4	12899.1
4.3074	1000000	808746	498038	316616	153015	63942.6	12921
4.31073	1000000	808818	498205	316804	153170	64033.8	12942.8
4.31407	1000000	808891	498372	316991	153324	64125	12964.7
4.3174	1000000	808964	498539	317177	153479	64216.2	12986.6
4.32073	1000000	809036	498705	317364	153633	64307.3	13008.4
4.32407	1000000	809109	498872	317550	153787	64398.4	13030.3
4.3274	1000000	809181	499038	317737	153941	64489.5	13052.2
4.33073	1000000	809253	499204	317923	154096	64580.6	13074
4.33407	1000000	809326	499370	318109	154250	64671.7	13095.9
4.3374	1000000	809398	499535	318295	154404	64762.7	13117.7
4.34073	1000000	809470	499701	318481	154558	64853.7	13139.6
4.34407	1000000	809542	499866	318666	154711	64944.8	13161.4
4.3474	1000000	809614	500032	318852	154865	65035.8	13183.3
4.35073	1000000	809685	500197	319037	155019	65126.7	13205.2
4.35407	1000000	809757	500361	319222	155173	65217.7	13227
4.3574	1000000	809829	500526	319407	155326	65308.6	13248.9
4.36073	1000000	809900	500691	319592	155480	65399.5	13270.7
4.36407	1000000	809972	500855	319777	155633	65490.4	13292.6
4.3674	1000000	810043	501019	319961	155786	65581.3	13314.4
4.37073	1000000	810115	501183	320146	155940	65672.2	13336.3
4.37407	1000000	810186	501347	320330	156093	65763	13358.1
4.3774	1000000	810257	501511	320514	156246	65853.9	13380
4.38073	1000000	810328	501675	320698	156399	65944.7	13401.8
4.38407	1000000	810399	501838	320882	156552	66035.5	13423.7
4.3874	1000000	810470	502001	321066	156705	66126.2	13445.5
4.39073	1000000	810541	502164	321249	156857	66217	13467.4
4.39407	1000000	810612	502327	321432	157010	66307.7	13489.2
4.3974	1000000	810683	502490	321616	157163	66398.4	13511.1
4.40073	1000000	810753	502653	321799	157315	66489.1	13532.9
4.40407	1000000	810824	502815	321982	157468	66579.8	13554.7
4.4074	1000000	810894	502977	322164	157620	66670.4	13576.6
4.41073	1000000	810965	503140	322347	157773	66761	13598.4
4.41407	1000000	811035	503302	322530	157925	66851.6	13620.3
4.4174	1000000	811105	503463	322712	158077	66942.2	13642.1
4.42073	1000000	811175	503625	322894	158229	67032.8	13663.9
4.42407	1000000	811245	503787	323076	158381	67123.3	13685.8
4.4274	1000000	811315	503948	323258	158533	67213.9	13707.6
4.43073	1000000	811385	504109	323440	158685	67304.4	13729.4
4.43407	1000000	811455	504270	323621	158837	67394.8	13751.2
4.4374	1000000	811525	504431	323803	158988	67485.3	13773.1
4.44073	1000000	811595	504592	323984	159140	67575.7	13794.9
4.44407	1000000	811664	504752	324165	159292	67666.2	13816.7
4.4474	1000000	811734	504913	324347	159443	67756.6	13838.5
4.45073	1000000	811803	505073	324527	159595	67846.9	13860.4
4.45407	1000000	811873	505233	324708	159746	67937.3	13882.2
4.4574	1000000	811942	505393	324889	159897	68027.6	13904
4.46073	1000000	812011	505553	325069	160048	68117.9	13925.8
4.46407	1000000	812080	505713	325250	160200	68208.2	13947.6
4.4674	1000000	812149	505872	325430	160351	68298.5	13969.4
4.47073	1000000	812218	506031	325610	160502	68388.7	13991.2
4.47407	1000000	812287	506191	325790	160652	68479	14013
4.4774	1000000	812356	506350	325969	160803	68569.2	14034.8
4.48073	1000000	812425	506509	326149	160954	68659.3	14056.6
4.48407	1000000	812494	506667	326328	161105	68749.5	14078.4
4.4874	1000000	812562	506826	326508	161255	68839.6	14100.2
4.49073	1000000	812631	506984	326687	161406	68929.7	14122
4.49407	1000000	812699	507143	326866	161556	69019.8	14143.8
4.4974	1000000	812768	507301	327045	161706	69109.9	14165.6
4.50073	1000000	812836	507459	327224	161857	69199.9	14187.4
4.50407	1000000	812904	507616	327402	162007	69290	14209.2
4.5074	1000000	812972	507774	327581	162157	69380	14231
4.51073	1000000	813040	507932	327759	162307	69469.9	14252.8
4.51407	1000000	813109	508089	327937	162457	69559.9	14274.5
4.5174	1000000	813176	508246	328115	162607	69649.8	14296.3
4.52073	1000000	813244	508403	328293	162757	69739.7	14318.1
4.52407	1000000	813312	508560	328471	162906	69829.6	14339.9
4.5274	1000000	813380	508717	328648	163056	69919.4	14361.6
4.53073	1000000	813448	508874	328826	163206	70009.3	14383.4
4.53407	1000000	813515	509030	329003	163355	70099.1	14405.1
4.5374	1000000	813583	509186	329180	163505	70188.9	14426.9
4.54073	1000000	813650	509342	329358	163654	70278.6	14448.7
4.54407	1000000	813717	509499	329534	163803	70368.4	14470.4
4.5474	1000000	813785	509654	329711	163952	70458.1	14492.2
4.55073	1000000	813852	509810	329888	164102	70547.8	14513.9
4.55407	1000000	813919	509966	330064	164251	70637.4	14535.7
4.5574	1000000	813986	510121	330241	164400	70727.1	14557.4
4.56073	1000000	814053	510276	330417	164548	70816.7	14579.2
4.56407	1000000	814120	510431	330593	164697	70906.3	14600.9
4.5674	1000000	814187	510586	330769	164846	70995.9	14622.6
4.57073	1000000	814254	510741	330945	164995	71085.4	14644.4
4.57407	1000000	814321	510896	331120	165143	71174.9	14666.1
4.5774	1000000	814387	511050	331296	165292	71264.4	14687.8
4.58073	1000000	814454	511205	331471	165440	71353.9	14709.6
4.58407	1000000	814520	511359	331646	165588	71443.3	14731.3
4.5874	1000000	814587	511513	331822	165737	71532.7	14753
4.59073	1000000	814653	511667	331997	165885	71622.1	14774.7
4.59407	1000000	814719	511821	332171	166033	71711.5	14796.4
4.5974	1000000	814786	511975	332346	166181	71800.8	14818.1
4.60073	1000000	814852	512128	332521	166329	71890.1	14839.8
4.60407	1000000	814918	512282	332695	166477	71979.4	14861.5
4.6074	1000000	814984	512435	332869	166625	72068.7	14883.2
4.61073	1000000	815050	512588	333043	166772	72157.9	14904.9
4.61407	1000000	815116	512741	333217	166920	72247.1	14926.6
4.6174	1000000	815181	512894	333391	167068	72336.3	14948.3
4.62073	1000000	815247	513046	333565	167215	72425.5	14970
4.62407	1000000	815313	513199	333738	167362	72514.6	14991.7
4.6274	1000000	815378	513351	333912	167510	72603.7	15013.4
4.63073	1000000	815444	513503	334085	167657	72692.8	15035
4.63407	1000000	815509	513655	334258	167804	72781.9	15056.7
4.6374	1000000	815575	513807	334431	167951	72870.9	15078.4
4.64073	1000000	815640	513959	334604	168098	72959.9	15100
4.64407	1000000	815705	514111	334777	168245	73048.9	15121.7
4.6474	1000000	815771	514262	334950	168392	73137.8	15143.4
4.65073	1000000	815836	514414	335122	168539	73226.8	15165
4.65407	1000000	815901	514565	335295	168686	73315.7	15186.7
4.6574	1000000	815966	514716	335467	168832	73404.5	15208.3
4.66073	1000000	816031	514867	335639	168979	73493.4	15230
4.66407	1000000	816095	515018	335811	169125	73582.2	15251.6
4.6674	1000000	816160	515168	335983	169272	73671	15273.2
4.67073	1000000	816225	515319	336154	169418	73759.7	15294.9
4.67407	1000000	816289	515469	336326	169564	73848.5	15316.5
4.6774	1000000	816354	515619	336497	169710	73937.2	15338.1
4.68073	1000000	816418	515769	336669	169857	74025.8	15359.7
4.68407	1000000	816483	515919	336840	170003	74114.5	15381.4
4.6874	1000000	816547	516069	337011	170148	74203.1	15403
4.69073	1000000	816612	516219	337182	170294	74291.7	15424.6
4.69407	1000000	816676	516368	337352	170440	74380.3	15446.2
4.6974	1000000	816740	516518	337523	170586	74468.8	15467.8
4.70073	1000000	816804	516667	337693	170731	74557.3	15489.4
4.70407	1000000	816868	516816	337864	170877	74645.8	15511
4.7074	1000000	816932	516965	338034	171022	74734.3	15532.6
4.71073	1000000	816996	517114	338204	171168	74822.7	15554.1
4.71407	1000000	817060	517263	338374	171313	74911.1	15575.7
4.7174	1000000	817123	517411	338544	171458	74999.5	15597.3
4.72073	1000000	817187	517560	338713	171603	75087.8	15618.9
4.72407	1000000	817251	517708	338883	171748	75176.2	15640.4
4.7274	1000000	817314	517856	339052	171893	75264.4	15662
4.73073	1000000	817378	518004	339221	172038	75352.7	15683.6
4.73407	1000000	817441	518152	339391	172183	75440.9	15705.1
4.7374	1000000	817505	518300	339560	172328	75529.1	15726.7
4.74073	1000000	817568	518447	339728	172473	75617.3	15748.2
4.74407	1000000	817631	518595	339897	172617	75705.5	15769.8
4.7474	1000000	817694	518742	340066	172762	75793.6	15791.3
4.75073	1000000	817757	518889	340234	172906	75881.7	15812.8
4.75407	1000000	817820	519036	340403	173051	75969.7	15834.4
4.7574	1000000	817883	519183	340571	173195	76057.7	15855.9
4.76073	1000000	817946	519330	340739	173339	76145.7	15877.4
4.76407	1000000	818009	519476	340907	173483	76233.7	15898.9
4.7674	1000000	818072	519623	341075	173627	76321.7	15920.4
4.77073	1000000	818134	519769	341242	173771	76409.6	15941.9
4.77407	1000000	818197	519916	341410	173915	76497.5	15963.4
4.7774	1000000	818260	520062	341577	174059	76585.3	15984.9
4.78073	1000000	818322	520208	341745	174203	76673.1	16006.4
4.78407	1000000	818385	520353	341912	174346	76760.9	16027.9
4.7874	1000000	818447	520499	342079	174490	76848.7	16049.4
4.79073	1000000	818509	520645	342246	174633	76936.4	16070.9
4.79407	1000000	818572	520790	342412	174777	77024.1	16092.4
4.7974	1000000	818634	520935	342579	174920	77111.8	16113.8
4.80073	1000000	818696	521081	342746	175063	77199.5	16135.3
4.80407	1000000	818758	521226	342912	175207	77287.1	16156.8
4.8074	1000000	818820	521370	343078	175350	77374.7	16178.2
4.81073	1000000	818882	521515	343244	175493	77462.2	16199.7
4.81407	1000000	818944	521660	343410	175636	77549.7	16221.1
4.8174	1000000	819005	521804	343576	175779	77637.2	16242.5
4.82073	1000000	819067	521949	343742	175921	77724.7	16264
4.82407	1000000	819129	522093	343907	176064	77812.1	16285.4
4.8274	1000000	819190	522237	344073	176207	77899.5	16306.8
4.83073	1000000	819252	522381	344238	176349	77986.9	16328.3
4.83407	1000000	819314	522525	344403	176492	78074.3	16349.7
4.8374	1000000	819375	522669	344569	176634	78161.6	16371.1
4.84073	1000000	819436	522812	344734	176776	78248.8	16392.5
4.84407	1000000	819498	522956	344898	176919	78336.1	16413.9
4.8474	1000000	819559	523099	345063	177061	78423.3	16435.3
4.85073	1000000	819620	523242	345228	177203	78510.5	16456.7
4.85407	1000000	819681	523385	345392	177345	78597.7	16478.1
4.8574	1000000	819742	523528	345556	177487	78684.8	16499.4
4.86073	1000000	819803	523671	345721	177629	78771.9	16520.8
4.86407	1000000	819864	523813	345885	177770	78859	16542.2
4.8674	1000000	819925	523956	346049	177912	78946	16563.5
4.87073	1000000	819986	524098	346212	178054	79033	16584.9
4.87407	1000000	820046	524241	346376	178195	79120	16606.3
4.8774	1000000	820107	524383	346540	178337	79206.9	16627.6
4.88073	1000000	820168	524525	346703	178478	79293.8	16648.9
4.88407	1000000	820228	524667	346866	178619	79380.7	16670.3
4.8874	1000000	820289	524808	347029	178761	79467.5	16691.6
4.89073	1000000	820349	524950	347192	178902	79554.4	16712.9
4.89407	1000000	820410	525091	347355	179043	79641.1	16734.3
4.8974	1000000	820470	525233	347518	179184	79727.9	16755.6
4.90073	1000000	820530	525374	347681	179325	79814.6	16776.9
4.90407	1000000	820590	525515	347843	179466	79901.3	16798.2
4.9074	1000000	820650	525656	348006	179606	79988	16819.5
4.91073	1000000	820711	525797	348168	179747	80074.6	16840.8
4.91407	1000000	820771	525938	348330	179888	80161.2	16862.1
4.9174	1000000	820830	526078	348492	180028	80247.7	16883.4
4.92073	1000000	820890	526219	348654	180168	80334.3	16904.6
4.92407	1000000	820950	526359	348816	180309	80420.8	16925.9
4.9274	1000000	821010	526499	348977	180449	80507.2	16947.2
4.93074	1000000	821070	526639	349139	180589	80593.7	16968.4
4.93407	1000000	821129	526779	349300	180729	80680.1	16989.7
4.9374	1000000	821189	526919	349462	180869	80766.4	17010.9
4.94074	1000000	821248	527059	349623	181009	80852.8	17032.2
4.94407	1000000	821308	527198	349784	181149	80939.1	17053.4
4.9474	1000000	821367	527338	349945	181289	81025.3	17074.7
4.95074	1000000	821427	527477	350105	181429	81111.6	17095.9
4.95407	1000000	821486	527616	350266	181568	81197.8	17117.1
4.9574	1000000	821545	527756	350427	181708	81283.9	17138.3
4.96074	1000000	821604	527894	350587	181847	81370.1	17159.5
4.96407	1000000	821663	528033	350747	181987	81456.2	17180.7
4.9674	1000000	821722	528172	350907	182126	81542.3	17201.9
4.97074	1000000	821781	528311	351067	182265	81628.3	17223.1
4.97407	1000000	821840	528449	351227	182405	81714.3	17244.3
4.9774	1000000	821899	528587	351387	182544	81800.3	17265.5
4.98074	1000000	821958	528726	351547	182683	81886.2	17286.7
4.98407	1000000	822017	528864	351706	182822	81972.1	17307.8
4.9874	1000000	822076	529002	351866	182961	82058	17329
4.99074	1000000	822134	529139	352025	183099	82143.8	17350.1
4.99407	1000000	822193	529277	352184	183238	82229.7	17371.3
4.9974	1000000	822251	529415	352343	183377	82315.4	17392.4
5.00074	1000000	822310	529552	352502	183515	82401.2	17413.6
5.00407	1000000	822368	529690	352661	183654	82486.9	17434.7
5.0074	1000000	822426	529827	352820	183792	82572.6	17455.8
5.01074	1000000	822485	529964	352978	183930	82658.2	17477
5.01407	1000000	822543	530101	353137	184069	82743.8	17498.1
5.0174	1000000	822601	530238	353295	184207	82829.4	17519.2
5.02074	1000000	822659	530374	353453	184345	82914.9	17540.3
5.02407	1000000	822717	530511	353611	184483	83000.4	17561.4
5.0274	1000000	822775	530647	353769	184621	83085.9	17582.5
5.03074	1000000	822833	530784	353927	184759	83171.3	17603.5
5.03407	1000000	822891	530920	354085	184896	83256.7	17624.6
5.0374	1000000	822949	531056	354242	185034	83342.1	17645.7
5.04074	1000000	823007	531192	354400	185172	83427.5	17666.7
5.04407	1000000	823064	531328	354557	185309	83512.8	17687.8
5.0474	1000000	823122	531464	354714	185446	83598	17708.9
5.05074	1000000	823180	531599	354871	185584	83683.3	17729.9
5.05407	1000000	823237	531735	355028	185721	83768.5	17750.9
5.0574	1000000	823295	531870	355185	185858	83853.6	17772
5.06074	1000000	823352	532006	355342	185995	83938.8	17793
5.06407	1000000	823410	532141	355498	186133	84023.9	17814
5.0674	1000000	823467	532276	355655	186269	84108.9	17835
5.07074	1000000	823524	532411	355811	186406	84194	17856
5.07407	1000000	823581	532545	355967	186543	84279	17877
5.0774	1000000	823639	532680	356124	186680	84363.9	17898
5.08074	1000000	823696	532815	356280	186817	84448.9	17919
5.08407	1000000	823753	532949	356435	186953	84533.7	17940
5.0874	1000000	823810	533083	356591	187090	84618.6	17961
5.09074	1000000	823867	533218	356747	187226	84703.4	17981.9
5.09407	1000000	823923	533352	356902	187362	84788.2	18002.9
5.0974	1000000	823980	533486	357058	187499	84873	18023.8
5.10074	1000000	824037	533620	357213	187635	84957.7	18044.8
5.10407	1000000	824094	533753	357368	187771	85042.4	18065.7
5.1074	1000000	824150	533887	357523	187907	85127	18086.7
5.11074	1000000	824207	534020	357678	188043	85211.6	18107.6
5.11407	1000000	824264	534154	357833	188179	85296.2	18128.5
5.1174	1000000	824320	534287	357988	188315	85380.8	18149.4
5.12074	1000000	824376	534420	358142	188450	85465.3	18170.3
5.12407	1000000	824433	534553	358297	188586	85549.8	18191.2
5.1274	1000000	824489	534686	358451	188721	85634.2	18212.1
5.13074	1000000	824545	534819	358605	188857	85718.6	18233
5.13407	1000000	824602	534951	358759	188992	85803	18253.9
5.1374	1000000	824658	535084	358913	189128	85887.3	18274.8
5.14074	1000000	824714	535216	359067	189263	85971.6	18295.6
5.14407	1000000	824770	535349	359221	189398	86055.9	18316.5
5.1474	1000000	824826	535481	359374	189533	86140.1	18337.4
5.15074	1000000	824882	535613	359528	189668	86224.3	18358.2
5.15407	1000000	824938	535745	359681	189803	86308.4	18379
5.1574	1000000	824994	535877	359835	189938	86392.6	18399.9
5.16074	1000000	825049	536008	359988	190073	86476.7	18420.7
5.16407	1000000	825105	536140	360141	190207	86560.7	18441.5
5.1674	1000000	825161	536272	360294	190342	86644.7	18462.3
5.17074	1000000	825216	536403	360446	190476	86728.7	18483.1
5.17407	1000000	825272	536534	360599	190611	86812.6	18503.9
5.1774	1000000	825327	536665	360752	190745	86896.6	18524.7
5.18074	1000000	825383	536796	360904	190880	86980.4	18545.5
5.18407	1000000	825438	536927	361056	191014	87064.3	18566.3
5.1874	1000000	825494	537058	361209	191148	87148.1	18587.1
5.19074	1000000	825549	537189	361361	191282	87231.8	18607.8
5.19407	1000000	825604	537319	361513	191416	87315.6	18628.6
5.1974	1000000	825659	537450	361665	191550	87399.3	18649.3
5.20074	1000000	825714	537580	361816	191684	87482.9	18670.1
5.20407	1000000	825770	537710	361968	191817	87566.5	18690.8
5.2074	1000000	825825	537841	362119	191951	87650.1	18711.5
5.21074	1000000	825880	537971	362271	192085	87733.7	18732.2
5.21407	1000000	825934	538101	362422	192218	87817.2	18753
5.2174	1000000	825989	538230	362573	192352	87900.7	18773.7
5.22074	1000000	826044	538360	362724	192485	87984.1	18794.4
5.22407	1000000	826099	538490	362875	192618	88067.5	18815.1
5.2274	1000000	826154	538619	363026	192752	88150.9	18835.7
5.23074	1000000	826208	538748	363177	192885	88234.2	18856.4
5.23407	1000000	826263	538878	363327	193018	88317.5	18877.1
5.2374	1000000	826317	539007	363478	193151	88400.8	18897.7
5.24074	1000000	826372	539136	363628	193284	88484	18918.4
5.24407	1000000	826426	539264	363778	193416	88567.2	18939.1
5.2474	1000000	826481	539393	363929	193549	88650.3	18959.7
5.25074	1000000	826535	539522	364079	193682	88733.5	18980.3
5.25407	1000000	826589	539650	364229	193814	88816.5	19001
5.2574	1000000	826644	539779	364378	193947	88899.6	19021.6
5.26074	1000000	826698	539907	364528	194079	88982.6	19042.2
5.26407	1000000	826752	540035	364678	194212	89065.5	19062.8
5.2674	1000000	826806	540164	364827	194344	89148.5	19083.4
5.27074	1000000	826860	540292	364976	194476	89231.4	19104
5.27407	1000000	826914	540419	365126	194608	89314.2	19124.6
5.2774	1000000	826968	540547	365275	194740	89397.1	19145.1
5.28074	1000000	827022	540675	365424	194872	89479.8	19165.7
5.28407	1000000	827076	540802	365572	195004	89562.6	19186.3
5.2874	1000000	827130	540930	365721	195136	89645.3	19206.8
5.29074	1000000	827183	541057	365870	195267	89728	19227.4
5.29407	1000000	827237	541184	366018	195399	89810.6	19247.9
5.2974	1000000	827291	541311	366167	195531	89893.2	19268.4
5.30074	1000000	827344	541438	366315	195662	89975.8	19288.9
5.30407	1000000	827398	541565	366463	195794	90058.3	19309.5
5.3074	1000000	827451	541692	366611	195925	90140.8	19330
5.31074	1000000	827505	541819	366759	196056	90223.2	19350.5
5.31407	1000000	827558	541945	366907	196187	90305.7	19371
5.3174	1000000	827611	542072	367055	196318	90388	19391.4
5.32074	1000000	827665	542198	367203	196449	90470.4	19411.9
5.32407	1000000	827718	542324	367350	196580	90552.7	19432.4
5.3274	1000000	827771	542450	367498	196711	90634.9	19452.9
5.33074	1000000	827824	542576	367645	196842	90717.2	19473.3
5.33407	1000000	827877	542702	367792	196973	90799.4	19493.8
5.3374	1000000	827930	542828	367939	197103	90881.5	19514.2
5.34074	1000000	827983	542954	368086	197234	90963.6	19534.6
5.34407	1000000	828036	543079	368233	197364	91045.7	19555
5.3474	1000000	828089	543205	368380	197495	91127.8	19575.5
5.35074	1000000	828142	543330	368526	197625	91209.8	19595.9
5.35407	1000000	828195	543455	368673	197755	91291.7	19616.3
5.3574	1000000	828247	543581	368819	197885	91373.7	19636.7
5.36074	1000000	828300	543706	368965	198015	91455.5	19657.1
5.36407	1000000	828353	543831	369112	198145	91537.4	19677.4
5.3674	1000000	828405	543955	369258	198275	91619.2	19697.8
5.37074	1000000	828458	544080	369404	198405	91701	19718.2
5.37407	1000000	828510	544205	369550	198535	91782.7	19738.5
5.3774	1000000	828563	544329	369695	198665	91864.4	19758.9
5.38074	1000000	828615	544454	369841	198794	91946.1	19779.2
5.38407	1000000	828667	544578	369986	198924	92027.7	19799.5
5.3874	1000000	828720	544702	370132	199053	92109.3	19819.9
5.39074	1000000	828772	544826	370277	199183	92190.9	19840.2
5.39407	1000000	828824	544950	370422	199312	92272.4	19860.5
5.3974	1000000	828876	545074	370567	199441	92353.9	19880.8
5.40074	1000000	828928	545198	370712	199570	92435.3	19901.1
5.40407	1000000	828980	545321	370857	199699	92516.7	19921.3
5.4074	1000000	829032	545445	371002	199828	92598.1	19941.6
5.41074	1000000	829084	545568	371147	199957	92679.4	19961.9
5.41407	1000000	829136	545692	371291	200086	92760.7	19982.2
5.4174	1000000	829188	545815	371436	200215	92841.9	20002.4
5.42074	1000000	829240	545938	371580	200344	92923.2	20022.6
5.42407	1000000	829291	546061	371724	200472	93004.3	20042.9
5.4274	1000000	829343	546184	371868	200601	93085.5	20063.1
5.43074	1000000	829395	546307	372012	200729	93166.6	20083.3
5.43407	1000000	829446	546429	372156	200858	93247.6	20103.5
5.4374	1000000	829498	546552	372300	200986	93328.6	20123.7
5.44074	1000000	829549	546675	372443	201114	93409.6	20143.9
5.44407	1000000	829601	546797	372587	201242	93490.6	20164.1
5.4474	1000000	829652	546919	372730	201370	93571.5	20184.3
5.45074	1000000	829704	547041	372874	201498	93652.4	20204.5
5.45407	1000000	829755	547164	373017	201626	93733.2	20224.6
5.4574	1000000	829806	547285	373160	201754	93814	20244.8
5.46074	1000000	829858	547407	373303	201882	93894.7	20264.9
5.46407	1000000	829909	547529	373446	202009	93975.4	20285.1
5.4674	1000000	829960	547651	373589	202137	94056.1	20305.2
5.47074	1000000	830011	547772	373731	202265	94136.8	20325.3
5.47407	1000000	830062	547894	373874	202392	94217.4	20345.5
5.4774	1000000	830113	548015	374016	202519	94297.9	20365.6
5.48074	1000000	830164	548136	374159	202647	94378.4	20385.7
5.48407	1000000	830215	548258	374301	202774	94458.9	20405.8
5.4874	1000000	830266	548379	374443	202901	94539.4	20425.8
5.49074	1000000	830316	548500	374585	203028	94619.8	20445.9
5.49407	1000000	830367	548620	374727	203155	94700.2	20466
5.4974	1000000	830418	548741	374869	203282	94780.5	20486
5.50074	1000000	830469	548862	375011	203409	94860.8	20506.1
5.50407	1000000	830519	548982	375152	203536	94941	20526.1
5.5074	1000000	830570	549103	375294	203662	95021.2	20546.2
5.51074	1000000	830620	549223	375435	203789	95101.4	20566.2
5.51407	1000000	830671	549343	375576	203915	95181.6	20586.2
5.5174	1000000	830721	549463	375718	204042	95261.7	20606.2
5.52074	1000000	830772	549583	375859	204168	95341.7	20626.2
5.52407	1000000	830822	549703	376000	204294	95421.7	20646.2
5.5274	1000000	830872	549823	376140	204421	95501.7	20666.2
5.53074	1000000	830922	549943	376281	204547	95581.7	20686.2
5.53407	1000000	830973	550063	376422	204673	95661.6	20706.1
5.5374	1000000	831023	550182	376562	204799	95741.4	20726.1
5.54074	1000000	831073	550302	376703	204925	95821.3	20746
5.54407	1000000	831123	550421	376843	205051	95901.1	20766
5.5474	1000000	831173	550540	376983	205176	95980.8	20785.9
5.55074	1000000	831223	550659	377123	205302	96060.5	20805.8
5.55407	1000000	831273	550778	377263	205428	96140.2	20825.8
5.5574	1000000	831323	550897	377403	205553	96219.8	20845.7
5.56074	1000000	831372	551016	377543	205679	96299.4	20865.6
5.56407	1000000	831422	551135	377683	205804	96379	20885.5
5.5674	1000000	831472	551253	377822	205929	96458.5	20905.3
5.57074	1000000	831522	551372	377962	206054	96538	20925.2
5.57407	1000000	831571	551490	378101	206180	96617.4	20945.1
5.5774	1000000	831621	551609	378241	206305	96696.8	20964.9
5.58074	1000000	831671	551727	378380	206430	96776.2	20984.8
5.58407	1000000	831720	551845	378519	206555	96855.5	21004.6
5.5874	1000000	831769	551963	378658	206679	96934.8	21024.5
5.59074	1000000	831819	552081	378797	206804	97014	21044.3
5.59407	1000000	831868	552199	378935	206929	97093.2	21064.1
5.5974	1000000	831918	552316	379074	207053	97172.4	21083.9
5.60074	1000000	831967	552434	379213	207178	97251.5	21103.7
5.60407	1000000	832016	552552	379351	207302	97330.6	21123.5
5.6074	1000000	832065	552669	379489	207427	97409.6	21143.3
5.61074	1000000	832115	552786	379628	207551	97488.6	21163.1
5.61407	1000000	832164	552904	379766	207675	97567.6	21182.8
5.6174	1000000	832213	553021	379904	207799	97646.5	21202.6
5.62074	1000000	832262	553138	380042	207924	97725.4	21222.3
5.62407	1000000	832311	553255	380179	208048	97804.3	21242.1
5.6274	1000000	832360	553371	380317	208171	97883.1	21261.8
5.63074	1000000	832409	553488	380455	208295	97961.9	21281.5
5.63407	1000000	832457	553605	380592	208419	98040.6	21301.2
5.6374	1000000	832506	553721	380730	208543	98119.3	21320.9
5.64074	1000000	832555	553838	380867	208666	98197.9	21340.6
5.64407	1000000	832604	553954	381004	208790	98276.5	21360.3
5.6474	1000000	832652	554070	381141	208913	98355.1	21380
5.65074	1000000	832701	554187	381278	209037	98433.7	21399.7
5.65407	1000000	832749	554303	381415	209160	98512.1	21419.3
5.6574	1000000	832798	554419	381552	209283	98590.6	21439
5.66074	1000000	832847	554535	381689	209406	98669	21458.6
5.66407	1000000	832895	554650	381825	209530	98747.4	21478.3
5.6674	1000000	832943	554766	381962	209653	98825.7	21497.9
5.67074	1000000	832992	554882	382098	209775	98904	21517.5
5.67407	1000000	833040	554997	382234	209898	98982.3	21537.1
5.6774	1000000	833088	555112	382370	210021	99060.5	21556.7
5.68074	1000000	833137	555228	382506	210144	99138.7	21576.3
5.68407	1000000	833185	555343	382642	210266	99216.8	21595.9
5.6874	1000000	833233	555458	382778	210389	99294.9	21615.5
5.69074	1000000	833281	555573	382914	210511	99373	21635
5.69407	1000000	833329	555688	383050	210634	99451	21654.6
5.6974	1000000	833377	555803	383185	210756	99529	21674.1
5.70074	1000000	833425	555917	383321	210878	99606.9	21693.7
5.70407	1000000	833473	556032	383456	211001	99684.8	21713.2
5.7074	1000000	833521	556147	383591	211123	99762.7	21732.7
5.71074	1000000	833569	556261	383727	211245	99840.5	21752.3
5.71407	1000000	833617	556375	383862	211367	99918.3	21771.8
5.7174	1000000	833664	556490	383997	211489	99996.1	21791.3
5.72074	1000000	833712	556604	384131	211610	100074	21810.7
5.72407	1000000	833760	556718	384266	211732	100151	21830.2
5.7274	1000000	833807	556832	384401	211854	100229	21849.7
5.73074	1000000	833855	556946	384535	211975	100307	21869.2
5.73407	1000000	833902	557059	384670	212097	100384	21888.6
5.7374	1000000	833950	557173	384804	212218	100462	21908.1
5.74074	1000000	833997	557287	384938	212340	100539	21927.5
5.74407	1000000	834045	557400	385072	212461	100617	21946.9
5.7474	1000000	834092	557514	385207	212582	100694	21966.3
5.75074	1000000	834140	557627	385340	212703	100771	21985.7
5.75407	1000000	834187	557740	385474	212824	100849	22005.1
5.7574	1000000	834234	557853	385608	212945	100926	22024.5
5.76074	1000000	834281	557966	385742	213066	101003	22043.9
5.76407	1000000	834328	558079	385875	213187	101080	22063.3
5.7674	1000000	834376	558192	386009	213308	101157	22082.7
5.77074	1000000	834423	558305	386142	213428	101235	22102
5.77407	1000000	834470	558417	386275	213549	101312	22121.4
5.7774	1000000	834517	558530	386408	213669	101389	22140.7
5.78074	1000000	834564	558642	386541	213790	101466	22160
5.78407	1000000	834611	558755	386674	213910	101543	22179.3
5.7874	1000000	834657	558867	386807	214030	101619	22198.7
5.79074	1000000	834704	558979	386940	214151	101696	22218
5.79407	1000000	834751	559091	387073	214271	101773	22237.2
5.7974	1000000	834798	559203	387205	214391	101850	22256.5
5.80074	1000000	834844	559315	387338	214511	101927	22275.8
5.80407	1000000	834891	559427	387470	214631	102003	22295.1
5.8074	1000000	834938	559539	387602	214751	102080	22314.3
5.81074	1000000	834984	559650	387734	214870	102157	22333.6
5.81407	1000000	835031	559762	387866	214990	102233	22352.8
5.8174	1000000	835077	559873	387998	215110	102310	22372
5.82074	1000000	835124	559985	388130	215229	102386	22391.3
5.82407	1000000	835170	560096	388262	215349	102463	22410.5
5.8274	1000000	835217	560207	388394	215468	102539	22429.7
5.83074	1000000	835263	560318	388525	215587	102616	22448.9
5.83407	1000000	835309	560429	388657	215707	102692	22468.1
5.8374	1000000	835356	560540	388788	215826	102768	22487.2
5.84074	1000000	835402	560651	388919	215945	102845	22506.4
5.84407	1000000	835448	560762	389050	216064	102921	22525.6
5.8474	1000000	835494	560872	389182	216183	102997	22544.7
5.85074	1000000	835540	560983	389313	216302	103073	22563.9
5.85407	1000000	835586	561093	389443	216420	103149	22583
5.8574	1000000	835632	561204	389574	216539	103225	22602.1
5.86074	1000000	835678	561314	389705	216658	103301	22621.2
5.86407	1000000	835724	561424	389835	216776	103377	22640.3
5.8674	1000000	835770	561534	389966	216895	103453	22659.4
5.87074	1000000	835816	561644	390096	217013	103529	22678.5
5.87407	1000000	835862	561754	390227	217132	103605	22697.6
5.8774	1000000	835907	561864	390357	217250	103681	22716.7
5.88074	1000000	835953	561974	390487	217368	103757	22735.7
5.88407	1000000	835999	562083	390617	217486	103832	22754.8
5.8874	1000000	836045	562193	390747	217604	103908	22773.8
5.89074	1000000	836090	562302	390877	217722	103984	22792.8
5.89407	1000000	836136	562412	391006	217840	104059	22811.9
5.8974	1000000	836181	562521	391136	217958	104135	22830.9
5.90074	1000000	836227	562630	391265	218076	104210	22849.9
5.90407	1000000	836272	562739	391395	218193	104286	22868.9
5.9074	1000000	836318	562848	391524	218311	104361	22887.9
5.91074	1000000	836363	562957	391653	218429	104437	22906.8
5.91407	1000000	836408	563066	391783	218546	104512	22925.8
5.9174	1000000	836454	563175	391912	218663	104588	22944.8
5.92074	1000000	836499	563283	392041	218781	104663	22963.7
5.92407	1000000	836544	563392	392169	218898	104738	22982.7
5.9274	1000000	836589	563500	392298	219015	104813	23001.6
5.93074	1000000	836634	563609	392427	219132	104888	23020.5
5.93407	1000000	836679	563717	392555	219249	104964	23039.4
5.9374	1000000	836725	563825	392684	219366	105039	23058.3
5.94074	1000000	836770	563933	392812	219483	105114	23077.2
5.94407	1000000	836815	564041	392940	219600	105189	23096.1
5.9474	1000000	836859	564149	393069	219716	105264	23115
5.95074	1000000	836904	564257	393197	219833	105339	23133.8
5.95407	1000000	836949	564365	393325	219950	105414	23152.7
5.9574	1000000	836994	564473	393453	220066	105488	23171.6
5.96074	1000000	837039	564580	393580	220183	105563	23190.4
5.96407	1000000	837084	564688	393708	220299	105638	23209.2
5.9674	1000000	837128	564795	393836	220415	105713	23228
5.97074	1000000	837173	564903	393963	220531	105787	23246.9
5.97407	1000000	837218	565010	394091	220648	105862	23265.7
5.9774	1000000	837262	565117	394218	220764	105937	23284.5
5.98074	1000000	837307	565224	394345	220880	106011	23303.2
5.98407	1000000	837351	565331	394472	220996	106086	23322
5.9874	1000000	837396	565438	394599	221111	106160	23340.8
5.99074	1000000	837440	565545	394726	221227	106235	23359.5
5.99407	1000000	837485	565652	394853	221343	106309	23378.3
5.9974	1000000	837529	565758	394980	221458	106384	23397
6.00074	1000000	837573	565865	395107	221574	106458	23415.8
6.00407	1000000	837617	565971	395233	221689	106532	23434.5
6.0074	1000000	837662	566078	395360	221805	106606	23453.2
6.01074	1000000	837706	566184	395486	221920	106681	23471.9
6.01407	1000000	837750	566290	395612	222035	106755	23490.6
6.0174	1000000	837794	566396	395739	222151	106829	23509.3
6.02074	1000000	837838	566502	395865	222266	106903	23527.9
6.02407	1000000	837882	566608	395991	222381	106977	23546.6
6.0274	1000000	837926	566714	396117	222496	107051	23565.2
6.03074	1000000	837970	566820	396242	222611	107125	23583.9
6.03407	1000000	838014	566926	396368	222725	107199	23602.5
6.0374	1000000	838058	567031	396494	222840	107273	23621.2
6.04074	1000000	838102	567137	396619	222955	107347	23639.8
6.04407	1000000	838146	567242	396745	223069	107421	23658.4
6.0474	1000000	838190	567348	396870	223184	107494	23677
6.05074	1000000	838233	567453	396995	223298	107568	23695.6
6.05407	1000000	838277	567558	397121	223413	107642	23714.2
6.0574	1000000	838321	567663	397246	223527	107715	23732.7
6.06074	1000000	838364	567768	397371	223641	107789	23751.3
6.06407	1000000	838408	567873	397496	223755	107862	23769.8
6.0674	1000000	838452	567978	397620	223869	107936	23788.4
6.07074	1000000	838495	568083	397745	223983	108009	23806.9
6.07407	1000000	838539	568187	397870	224097	108083	23825.4
6.0774	1000000	838582	568292	397994	224211	108156	23844
6.08074	1000000	838625	568397	398119	224325	108230	23862.5
6.08407	1000000	838669	568501	398243	224439	108303	23881
6.0874	1000000	838712	568605	398367	224552	108376	23899.4
6.09074	1000000	838755	568710	398491	224666	108450	23917.9
6.09407	1000000	838799	568814	398615	224779	108523	23936.4
6.0974	1000000	838842	568918	398739	224893	108596	23954.9
6.10074	1000000	838885	569022	398863	225006	108669	23973.3
6.10407	1000000	838928	569126	398987	225120	108742	23991.7
6.1074	1000000	838971	569230	399111	225233	108815	24010.2
6.11074	1000000	839015	569333	399234	225346	108888	24028.6
6.11407	1000000	839058	569437	399358	225459	108961	24047
6.1174	1000000	839101	569541	399481	225572	109034	24065.4
6.12074	1000000	839144	569644	399605	225685	109107	24083.8
6.12407	1000000	839186	569748	399728	225798	109180	24102.2
6.1274	1000000	839229	569851	399851	225911	109252	24120.6
6.13074	1000000	839272	569954	399974	226023	109325	24138.9
6.13407	1000000	839315	570057	400097	226136	109398	24157.3
6.1374	1000000	839358	570160	400220	226248	109471	24175.6
6.14074	1000000	839401	570264	400343	226361	109543	24194
6.14407	1000000	839443	570366	400465	226473	109616	24212.3
6.1474	1000000	839486	570469	400588	226586	109688	24230.6
6.15074	1000000	839529	570572	400711	226698	109761	24248.9
6.15407	1000000	839571	570675	400833	226810	109833	24267.2
6.1574	1000000	839614	570777	400955	226922	109906	24285.5
6.16074	1000000	839656	570880	401078	227034	109978	24303.8
6.16407	1000000	839699	570982	401200	227146	110050	24322.1
6.1674	1000000	839741	571085	401322	227258	110123	24340.3
6.17074	1000000	839784	571187	401444	227370	110195	24358.6
6.17407	1000000	839826	571289	401566	227482	110267	24376.8
6.1774	1000000	839868	571391	401687	227594	110339	24395.1
6.18074	1000000	839911	571493	401809	227705	110412	24413.3
6.18407	1000000	839953	571595	401931	227817	110484	24431.5
6.1874	1000000	839995	571697	402052	227928	110556	24449.7
6.19074	1000000	840037	571799	402174	228040	110628	24467.9
6.19407	1000000	840080	571901	402295	228151	110700	24486.1
6.1974	1000000	840122	572002	402416	228262	110772	24504.3
6.20074	1000000	840164	572104	402537	228373	110844	24522.4
6.20407	1000000	840206	572205	402659	228485	110915	24540.6
6.2074	1000000	840248	572307	402780	228596	110987	24558.7
6.21074	1000000	840290	572408	402900	228707	111059	24576.9
6.21407	1000000	840332	572509	403021	228818	111131	24595
6.2174	1000000	840374	572610	403142	228928	111202	24613.1
6.22074	1000000	840416	572711	403263	229039	111274	24631.2
6.22407	1000000	840458	572812	403383	229150	111346	24649.3
6.2274	1000000	840499	572913	403504	229260	111417	24667.4
6.23074	1000000	840541	573014	403624	229371	111489	24685.5
6.23407	1000000	840583	573115	403744	229482	111560	24703.6
6.2374	1000000	840625	573215	403864	229592	111632	24721.7
6.24074	1000000	840666	573316	403985	229702	111703	24739.7
6.24407	1000000	840708	573416	404105	229813	111775	24757.8
6.2474	1000000	840750	573517	404224	229923	111846	24775.8
6.25074	1000000	840791	573617	404344	230033	111917	24793.8
6.25407	1000000	840833	573718	404464	230143	111988	24811.8
6.2574	1000000	840874	573818	404584	230253	112060	24829.8
6.26074	1000000	840916	573918	404703	230363	112131	24847.8
6.26407	1000000	840957	574018	404823	230473	112202	24865.8
6.2674	1000000	840999	574118	404942	230582	112273	24883.8
6.27074	1000000	841040	574218	405061	230692	112344	24901.8
6.27407	1000000	841081	574317	405181	230802	112415	24919.7
6.2774	1000000	841122	574417	405300	230911	112486	24937.7
6.28074	1000000	841164	574517	405419	231021	112557	24955.6
6.28407	1000000	841205	574616	405538	231130	112628	24973.6
6.2874	1000000	841246	574716	405657	231240	112699	24991.5
6.29074	1000000	841287	574815	405775	231349	112770	25009.4
6.29407	1000000	841328	574914	405894	231458	112840	25027.3
6.2974	1000000	841370	575014	406013	231567	112911	25045.2
6.30074	1000000	841411	575113	406131	231676	112982	25063.1
6.30407	1000000	841452	575212	406250	231785	113052	25080.9
6.3074	1000000	841493	575311	406368	231894	113123	25098.8
6.31074	1000000	841534	575410	406486	232003	113193	25116.7
6.31407	1000000	841574	575509	406604	232112	113264	25134.5
6.3174	1000000	841615	575607	406723	232221	113334	25152.3
6.32074	1000000	841656	575706	406841	232329	113405	25170.2
6.32407	1000000	841697	575805	406958	232438	113475	25188
6.3274	1000000	841738	575903	407076	232546	113546	25205.8
6.33074	1000000	841778	576002	407194	232655	113616	25223.6
6.33407	1000000	841819	576100	407312	232763	113686	25241.4
6.3374	1000000	841860	576198	407429	232871	113757	25259.2
6.34074	1000000	841901	576297	407547	232980	113827	25276.9
6.34407	1000000	841941	576395	407664	233088	113897	25294.7
6.3474	1000000	841982	576493	407781	233196	113967	25312.4
6.35074	1000000	842022	576591	407899	233304	114037	25330.2
6.35407	1000000	842063	576689	408016	233412	114107	25347.9
6.3574	1000000	842103	576786	408133	233520	114177	25365.6
6.36074	1000000	842144	576884	408250	233628	114247	25383.3
6.36407	1000000	842184	576982	408367	233735	114317	25401
6.3674	1000000	842224	577079	408483	233843	114387	25418.7
6.37074	1000000	842265	577177	408600	233951	114457	25436.4
6.37407	1000000	842305	577274	408717	234058	114526	25454.1
6.3774	1000000	842345	577372	408833	234166	114596	25471.8
6.38074	1000000	842386	577469	408950	234273	114666	25489.4
6.38407	1000000	842426	577566	409066	234380	114736	25507.1
6.3874	1000000	842466	577663	409182	234488	114805	25524.7
6.39074	1000000	842506	577760	409299	234595	114875	25542.3
6.39407	1000000	842546	577857	409415	234702	114944	25559.9
6.3974	1000000	842586	577954	409531	234809	115014	25577.5
6.40074	1000000	842626	578051	409647	234916	115083	25595.1
6.40407	1000000	842666	578148	409763	235023	115153	25612.7
6.4074	1000000	842706	578245	409878	235130	115222	25630.3
6.41074	1000000	842746	578341	409994	235236	115292	25647.9
6.41407	1000000	842786	578438	410110	235343	115361	25665.4
6.4174	1000000	842826	578534	410225	235450	115430	25683
6.42074	1000000	842866	578631	410340	235556	115499	25700.5
6.42407	1000000	842906	578727	410456	235663	115569	25718.1
6.4274	1000000	842945	578823	410571	235769	115638	25735.6
6.43074	1000000	842985	578919	410686	235875	115707	25753.1
6.43407	1000000	843025	579015	410801	235982	115776	25770.6
6.4374	1000000	843064	579111	410916	236088	115845	25788.1
6.44074	1000000	843104	579207	411031	236194	115914	25805.6
6.44407	1000000	843144	579303	411146	236300	115983	25823
6.4474	1000000	843183	579399	411261	236406	116052	25840.5
6.45074	1000000	843223	579495	411376	236512	116121	25858
6.45407	1000000	843262	579590	411490	236618	116189	25875.4
6.4574	1000000	843302	579686	411605	236724	116258	25892.8
6.46074	1000000	843341	579781	411719	236829	116327	25910.3
6.46407	1000000	843381	579877	411833	236935	116396	25927.7
6.4674	1000000	843420	579972	411948	237041	116464	25945.1
6.47074	1000000	843459	580067	412062	237146	116533	25962.5
6.47407	1000000	843499	580162	412176	237252	116602	25979.9
6.4774	1000000	843538	580257	412290	237357	116670	25997.3
6.48074	1000000	843577	580352	412404	237462	116739	26014.6
6.48407	1000000	843616	580447	412518	237568	116807	26032
6.4874	1000000	843656	580542	412631	237673	116875	26049.3
6.49074	1000000	843695	580637	412745	237778	116944	26066.7
6.49407	1000000	843734	580732	412859	237883	117012	26084
6.4974	1000000	843773	580826	412972	237988	117080	26101.3
6.50074	1000000	843812	580921	413086	238093	117149	26118.6
6.50407	1000000	843851	581016	413199	238198	117217	26135.9
6.5074	1000000	843890	581110	413312	238302	117285	26153.2
6.51074	1000000	843929	581204	413425	238407	117353	26170.5
6.51407	1000000	843968	581299	413538	238512	117421	26187.8
6.5174	1000000	844007	581393	413651	238616	117489	26205.1
6.52074	1000000	844046	581487	413764	238721	117557	26222.3
6.52407	1000000	844085	581581	413877	238825	117625	26239.5
6.5274	1000000	844123	581675	413990	238929	117693	26256.8
6.53074	1000000	844162	581769	414103	239034	117761	26274
6.53407	1000000	844201	581863	414215	239138	117829	26291.2
6.5374	1000000	844240	581956	414328	239242	117897	26308.4
6.54074	1000000	844278	582050	414440	239346	117965	26325.6
6.54407	1000000	844317	582144	414552	239450	118032	26342.8
6.5474	1000000	844356	582237	414665	239554	118100	26360
6.55074	1000000	844394	582331	414777	239658	118168	26377.2
6.55407	1000000	844433	582424	414889	239762	118235	26394.3
6.5574	1000000	844471	582518	415001	239865	118303	26411.5
6.56074	1000000	844510	582611	415113	239969	118371	26428.6
6.56407	1000000	844548	582704	415225	240073	118438	26445.7
6.5674	1000000	844586	582797	415337	240176	118506	26462.9
6.57074	1000000	844625	582890	415448	240280	118573	26480
6.57407	1000000	844663	582983	415560	240383	118640	26497.1
6.5774	1000000	844702	583076	415671	240486	118708	26514.2
6.58074	1000000	844740	583169	415783	240590	118775	26531.2
6.58407	1000000	844778	583262	415894	240693	118842	26548.3
6.5874	1000000	844816	583354	416005	240796	118909	26565.4
6.59074	1000000	844855	583447	416117	240899	118977	26582.4
6.59407	1000000	844893	583539	416228	241002	119044	26599.5
6.5974	1000000	844931	583632	416339	241105	119111	26616.5
6.60074	1000000	844969	583724	416450	241208	119178	26633.5
6.60407	1000000	845007	583817	416561	241311	119245	26650.5
6.6074	1000000	845045	583909	416671	241413	119312	26667.5
6.61074	1000000	845083	584001	416782	241516	119379	26684.5
6.61407	1000000	845121	584093	416893	241619	119446	26701.5
6.6174	1000000	845159	584185	417003	241721	119513	26718.5
6.62074	1000000	845197	584277	417114	241824	119579	26735.5
6.62407	1000000	845235	584369	417224	241926	119646	26752.4
6.6274	1000000	845273	584461	417335	242028	119713	26769.4
6.63074	1000000	845311	584553	417445	242131	119780	26786.3
6.63407	1000000	845348	584644	417555	242233	119846	26803.2
6.6374	1000000	845386	584736	417665	242335	119913	26820.2
6.64074	1000000	845424	584827	417775	242437	119980	26837.1
6.64407	1000000	845462	584919	417885	242539	120046	26854
6.6474	1000000	845499	585010	417995	242641	120113	26870.9
6.65074	1000000	845537	585102	418104	242743	120179	26887.7
6.65407	1000000	845574	585193	418214	242844	120245	26904.6
6.6574	1000000	845612	585284	418324	242946	120312	26921.5
6.66074	1000000	845650	585375	418433	243048	120378	26938.3
[truncated: 78,001 more rows]
