# Supplementary material for: Seepage Deformation and Failure of Rock Mass Under High Water Pressure With a Discrete Element Method
Source: Frontiers journal article supplement (doi:10.3389/fphy.2022.857158), 2022-04-12
Supplement: Table_2.XLSX [file Table_2.XLSX]

## Sheet: Sheet1
time/s	A	B	C	D	E	F	G
0.000122222	1000000	0	0	0	0	0	0
0.000677778	1000000	0	0	0	0	0	0
0.00123333	1000000	0	0	0	0	0	0
0.00178889	1000000	0	0	0	0	0	0
0.00234445	1000000	0	0	0	0	0	0
0.0029	1000000	30.2619	0	0	0	0	0
0.00345556	1000000	307.204	0	0	0	0	0
0.00401111	1000000	992.776	0	0	0	0	0
0.00456667	1000000	2183.84	0	0	0	0	0
0.00512222	1000000	3906.31	0	0	0	0	0
0.00567778	1000000	6171.24	0	0	0	0	0
0.00623334	1000000	8943.67	0	0	0	0	0
0.00678889	1000000	12178.5	0	0	0	0	0
0.00734445	1000000	15846.7	1.77687e-06	0	0	0	0
0.0079	1000000	19887.5	5.15622e-05	0	0	0	0
0.00845556	1000000	24254.6	0.000393963	0	0	0	0
0.00901111	1000000	28912.3	0.00183045	0	0	0	0
0.00956667	1000000	33810.2	0.00636956	0	0	0	0
0.0101222	1000000	38915.4	0.018217	0	0	0	0
0.0106778	1000000	44194.5	0.0451205	5.41545e-11	0	0	0
0.0112333	1000000	49611.9	0.100043	1.28846e-09	0	0	0
0.0117889	1000000	55145.6	0.203045	1.21237e-08	0	0	0
0.0123444	1000000	60769.3	0.383347	7.24187e-08	0	0	0
0.0129	1000000	66460	0.681413	3.24455e-07	0	0	0
0.0134556	1000000	72200.4	1.15091	1.18548e-06	0	0	0
0.0140111	1000000	77973.1	1.86058	3.71238e-06	0	0	0
0.0145667	1000000	83763.3	2.89575	1.02918e-05	0	0	0
0.0151222	1000000	89559.4	4.35957	2.58393e-05	1.81446e-18	0	0
0.0156778	1000000	95349.9	6.37392	5.97369e-05	5.74726e-17	0	0
0.0162333	1000000	101125	9.07982	0.000128781	9.71206e-16	0	0
0.0167889	1000000	106878	12.6376	0.000261451	1.00824e-14	0	0
0.0173445	1000000	112601	17.2266	0.000503825	7.39463e-14	0	0
0.0179	1000000	118288	23.0446	0.000927456	4.20214e-13	0	0
0.0184556	1000000	123933	30.3067	0.00163955	1.96406e-12	1.08379e-25	0
0.0190111	1000000	129531	39.2446	0.00279571	7.8608e-12	5.30438e-24	0
0.0195667	1000000	135080	50.1046	0.00461546	2.77187e-11	1.02043e-22	0
0.0201222	1000000	140576	63.1465	0.00740076	8.79355e-11	1.21025e-21	0
0.0206778	1000000	146016	78.6418	0.0115576	2.55005e-10	1.04952e-20	0
0.0212333	1000000	151398	96.8716	0.0176208	6.84415e-10	7.26799e-20	0
0.0217889	1000000	156720	118.125	0.0262814	1.71703e-09	4.23402e-19	2.54768e-30
0.0223445	1000000	161981	142.698	0.0384178	4.05903e-09	2.14482e-18	7.09482e-29
0.0229	1000000	167179	170.89	0.0551289	9.10207e-09	9.66134e-18	1.03219e-27
0.0234556	1000000	172313	203.003	0.0777696	1.94692e-08	3.93218e-17	1.04527e-26
0.0240111	1000000	177384	239.341	0.107989	3.99108e-08	1.46361e-16	8.27678e-26
0.0245667	1000000	182390	280.205	0.14777	7.87258e-08	5.0302e-16	5.45514e-25
0.0251222	1000000	187333	325.896	0.199471	1.49947e-07	1.609e-15	3.11022e-24
0.0256778	1000000	192211	376.71	0.265864	2.76607e-07	4.82244e-15	1.57403e-23
0.0262333	1000000	197025	432.938	0.350183	4.955e-07	1.36224e-14	7.20096e-23
0.0267889	1000000	201774	494.863	0.456158	8.63949e-07	3.6453e-14	3.01839e-22
0.0273445	1000000	206458	562.764	0.588064	1.46925e-06	9.2826e-14	1.17121e-21
0.0279	1000000	211078	636.909	0.750757	2.44153e-06	2.25842e-13	4.24115e-21
0.0284556	1000000	215636	717.558	0.949711	3.97102e-06	5.26856e-13	1.44264e-20
0.0290111	1000000	220131	804.96	1.19106	6.33079e-06	1.18228e-12	4.63458e-20
0.0295667	1000000	224564	899.354	1.48163	9.90622e-06	2.5594e-12	1.41261e-19
0.0301222	1000000	228934	1000.97	1.82897	1.52327e-05	5.3588e-12	4.1012e-19
0.0306778	1000000	233245	1110.02	2.24139	2.3043e-05	1.08773e-11	1.13808e-18
0.0312333	1000000	237496	1226.71	2.72795	3.43265e-05	2.14494e-11	3.0279e-18
0.0317889	1000000	241689	1351.23	3.29855	5.04015e-05	4.117e-11	7.74482e-18
0.0323445	1000000	245824	1483.76	3.9639	7.30037e-05	7.70501e-11	1.90925e-17
0.0329	1000000	249902	1624.47	4.73552	0.000104392	1.40825e-10	4.54657e-17
0.0334556	1000000	253924	1773.52	5.62581	0.000147474	2.51727e-10	1.04802e-16
0.0340111	1000000	257891	1931.04	6.64801	0.000205956	4.40656e-10	2.34291e-16
0.0345667	1000000	261803	2097.17	7.81622	0.000284517	7.56336e-10	5.08859e-16
0.0351222	1000000	265663	2272.02	9.14542	0.000389006	1.27427e-09	1.07548e-15
0.0356778	1000000	269469	2455.7	10.6514	0.000526678	2.10953e-09	2.21524e-15
0.0362333	1000000	273224	2648.31	12.3509	0.000706457	3.43479e-09	4.45305e-15
0.0367889	1000000	276928	2849.92	14.2613	0.000939229	5.50536e-09	8.74729e-15
0.0373445	1000000	280582	3060.61	16.4011	0.00123819	8.69354e-09	1.68108e-14
0.0379	1000000	284187	3280.44	18.7894	0.00161919	1.3535e-08	3.16438e-14
0.0384556	1000000	287744	3509.45	21.4461	0.00210121	2.07912e-08	5.84018e-14
0.0390111	1000000	291254	3747.7	24.3919	0.00270674	3.15311e-08	1.05784e-13
0.0395667	1000000	294717	3995.2	27.6484	0.00346235	4.72393e-08	1.88221e-13
0.0401222	1000000	298135	4251.97	31.2376	0.0043992	6.99551e-08	3.29257e-13
0.0406778	1000000	301508	4518.03	35.1825	0.00555366	1.02451e-07	5.66715e-13
0.0412333	1000000	304838	4793.38	39.5065	0.00696792	1.48461e-07	9.60465e-13
0.0417889	1000000	308124	5078.02	44.2339	0.00869073	2.12965e-07	1.60394e-12
0.0423445	1000000	311368	5371.92	49.3893	0.0107781	3.02549e-07	2.64098e-12
0.0429	1000000	314570	5675.06	54.9981	0.0132941	4.25846e-07	4.29026e-12
0.0434556	1000000	317732	5987.42	61.086	0.0163116	5.94082e-07	6.88006e-12
0.0440111	1000000	320853	6308.96	67.6795	0.0199135	8.21744e-07	1.08975e-11
0.0445667	1000000	323936	6639.64	74.8051	0.0241931	1.12738e-06	1.70574e-11
0.0451222	1000000	326979	6979.4	82.4901	0.0292556	1.53459e-06	2.63972e-11
0.0456778	1000000	329985	7328.19	90.762	0.0352186	2.07317e-06	4.04073e-11
0.0462333	1000000	332954	7685.96	99.6486	0.0422138	2.78049e-06	6.12079e-11
0.0467889	1000000	335886	8052.63	109.178	0.0503875	3.70317e-06	9.1786e-11
0.0473445	1000000	338782	8428.13	119.379	0.0599019	4.89895e-06	1.36313e-10
0.0479	1000000	341644	8812.39	130.279	0.0709364	6.439e-06	2.0056e-10
0.0484556	1000000	344470	9205.33	141.908	0.0836888	8.41047e-06	2.92449e-10
0.0490111	1000000	347263	9606.87	154.295	0.0983762	1.09196e-05	4.22765e-10
0.0495667	1000000	350022	10016.9	167.467	0.115237	1.40951e-05	6.06074e-10
0.0501222	1000000	352749	10435.4	181.456	0.13453	1.80923e-05	8.61904e-10
0.0506778	1000000	355443	10862.2	196.289	0.156539	2.30975e-05	1.21625e-09
0.0512334	1000000	358106	11297.2	211.995	0.181573	2.93333e-05	1.70345e-09
0.0517889	1000000	360738	11740.3	228.604	0.209964	3.70647e-05	2.36862e-09
0.0523445	1000000	363339	12191.5	246.145	0.242073	4.66051e-05	3.27056e-09
0.0529	1000000	365910	12650.6	264.646	0.27829	5.83242e-05	4.48554e-09
0.0534556	1000000	368453	13117.5	284.136	0.319033	7.26563e-05	6.11176e-09
0.0540111	1000000	370966	13592.1	304.643	0.364753	9.01092e-05	8.27504e-09
0.0545667	1000000	373451	14074.3	326.197	0.415931	0.000111275	1.11356e-08
0.0551222	1000000	375908	14564.1	348.824	0.473084	0.000136841	1.48964e-08
0.0556778	1000000	378337	15061.2	372.553	0.536763	0.000167601	1.98131e-08
0.0562334	1000000	380740	15565.5	397.412	0.607554	0.000204474	2.62063e-08
0.0567889	1000000	383116	16077	423.427	0.686081	0.000248512	3.44757e-08
0.0573445	1000000	385467	16595.6	450.626	0.773007	0.000300921	4.51176e-08
0.0579	1000000	387791	17121	479.034	0.869034	0.000363081	5.87451e-08
0.0584556	1000000	390091	17653.3	508.679	0.974904	0.000436558	7.61123e-08
0.0590111	1000000	392366	18192.3	539.586	1.0914	0.000523134	9.81427e-08
0.0595667	1000000	394617	18737.9	571.781	1.21936	0.000624823	1.25962e-07
0.0601222	1000000	396844	19289.9	605.289	1.35963	0.000743899	1.60939e-07
0.0606778	1000000	399047	19848.3	640.133	1.51316	0.000882923	2.04726e-07
0.0612334	1000000	401227	20412.9	676.339	1.68088	0.00104477	2.59317e-07
0.0617889	1000000	403385	20983.7	713.93	1.86381	0.00123265	3.27103e-07
0.0623445	1000000	405521	21560.4	752.929	2.06302	0.00145017	4.10944e-07
0.0629	1000000	407634	22143.1	793.358	2.27959	0.00170133	5.1425e-07
0.0634556	1000000	409726	22731.6	835.241	2.51468	0.00199058	6.41067e-07
0.0640111	1000000	411797	23325.7	878.599	2.76949	0.00232287	7.96187e-07
0.0645667	1000000	413847	23925.3	923.452	3.04528	0.00270367	9.85259e-07
0.0651222	1000000	415876	24530.5	969.822	3.34334	0.00313901	1.21493e-06
0.0656778	1000000	417885	25140.9	1017.73	3.66502	0.00363556	1.49298e-06
0.0662334	1000000	419875	25756.6	1067.19	4.01174	0.00420063	1.82852e-06
0.0667889	1000000	421844	26377.4	1118.23	4.38495	0.00484227	2.23216e-06
0.0673445	1000000	423795	27003.2	1170.86	4.78614	0.00556928	2.71622e-06
0.0679	1000000	425726	27634	1225.11	5.21689	0.0063913	3.29497e-06
0.0684556	1000000	427639	28269.5	1280.98	5.67881	0.00731885	3.98491e-06
0.0690111	1000000	429534	28909.7	1338.5	6.17356	0.00836337	4.80507e-06
0.0695667	1000000	431410	29554.5	1397.68	6.70285	0.00953733	5.77729e-06
0.0701222	1000000	433269	30203.7	1458.54	7.26846	0.0108543	6.92664e-06
0.0706778	1000000	435110	30857.4	1521.1	7.87221	0.0123289	8.28177e-06
0.0712334	1000000	436934	31515.3	1585.36	8.51597	0.013977	9.87538e-06
0.0717889	1000000	438741	32177.4	1651.35	9.20168	0.0158158	1.17447e-05
0.0723445	1000000	440531	32843.6	1719.07	9.9313	0.0178638	1.3932e-05
0.0729	1000000	442304	33513.8	1788.54	10.7069	0.020141	1.64852e-05
0.0734556	1000000	444062	34187.9	1859.77	11.5305	0.0226688	1.94585e-05
0.0740111	1000000	445803	34865.7	1932.78	12.4043	0.0254703	2.2913e-05
0.0745667	1000000	447529	35547.3	2007.57	13.3304	0.0285703	2.69174e-05
0.0751222	1000000	449239	36232.5	2084.16	14.3111	0.0319952	3.15492e-05
0.0756778	1000000	450934	36921.1	2162.55	15.3487	0.0357734	3.6895e-05
0.0762334	1000000	452613	37613.3	2242.76	16.4455	0.0399352	4.3052e-05
0.0767889	1000000	454278	38308.7	2324.79	17.6038	0.0445129	5.01285e-05
0.0773445	1000000	455928	39007.5	2408.66	18.8262	0.0495411	5.82455e-05
0.0779	1000000	457564	39709.3	2494.38	20.1151	0.0550565	6.75375e-05
0.0784556	1000000	459186	40414.3	2581.94	21.473	0.061098	7.81541e-05
0.0790111	1000000	460793	41122.3	2671.36	22.9024	0.067707	9.02612e-05
0.0795667	1000000	462387	41833.2	2762.65	24.4061	0.0749277	0.000104042
0.0801222	1000000	463967	42546.9	2855.81	25.9866	0.0828066	0.000119701
0.0806778	1000000	465533	43263.4	2950.84	27.6467	0.091393	0.00013746
0.0812334	1000000	467087	43982.5	3047.76	29.389	0.100739	0.000157567
0.0817889	1000000	468627	44704.3	3146.57	31.2165	0.1109	0.000180294
0.0823445	1000000	470154	45428.6	3247.27	33.1318	0.121934	0.00020594
0.0829	1000000	471669	46155.3	3349.86	35.138	0.133902	0.00023483
0.0834556	1000000	473171	46884.4	3454.36	37.2378	0.146869	0.000267324
0.0840111	1000000	474660	47615.8	3560.76	39.4342	0.160903	0.000303814
0.0845667	1000000	476138	48349.5	3669.06	41.7302	0.176074	0.000344727
0.0851223	1000000	477603	49085.3	3779.27	44.1288	0.19246	0.000390531
0.0856778	1000000	479057	49823.2	3891.4	46.6331	0.210137	0.000441735
0.0862334	1000000	480498	50563.1	4005.43	49.2461	0.229189	0.000498891
0.0867889	1000000	481929	51305	4121.38	51.9709	0.249702	0.0005626
0.0873445	1000000	483347	52048.8	4239.25	54.8107	0.271766	0.000633515
0.0879	1000000	484755	52794.4	4359.03	57.7687	0.295476	0.000712342
0.0884556	1000000	486151	53541.8	4480.72	60.848	0.320932	0.000799846
0.0890111	1000000	487537	54290.8	4604.33	64.0519	0.348236	0.000896852
0.0895667	1000000	488911	55041.6	4729.85	67.3837	0.377496	0.00100425
0.0901223	1000000	490275	55793.9	4857.29	70.8465	0.408825	0.00112301
0.0906778	1000000	491628	56547.7	4986.64	74.4438	0.442339	0.00125417
0.0912334	1000000	492971	57303	5117.89	78.1789	0.478161	0.00139883
0.0917889	1000000	494304	58059.7	5251.06	82.055	0.516416	0.00155821
0.0923445	1000000	495626	58817.8	5386.13	86.0756	0.557238	0.00173358
0.0929	1000000	496938	59577.1	5523.11	90.244	0.600762	0.00192633
0.0934556	1000000	498240	60337.7	5661.98	94.5637	0.647131	0.00213794
0.0940111	1000000	499533	61099.5	5802.76	99.0381	0.696492	0.00236999
0.0945667	1000000	500816	61862.4	5945.42	103.671	0.748998	0.00262418
0.0951223	1000000	502089	62626.5	6089.98	108.465	0.804808	0.00290232
0.0956778	1000000	503353	63391.5	6236.42	113.424	0.864085	0.00320633
0.0962334	1000000	504608	64157.6	6384.75	118.551	0.926999	0.00353828
0.0967889	1000000	505853	64924.5	6534.95	123.851	0.993725	0.00390036
0.0973445	1000000	507089	65692.4	6687.03	129.326	1.06445	0.00429491
0.0979	1000000	508316	66461.1	6840.98	134.98	1.13935	0.00472441
0.0984556	1000000	509535	67230.7	6996.78	140.817	1.21862	0.00519149
0.0990111	1000000	510744	68000.9	7154.45	146.839	1.30247	0.00569897
0.0995667	1000000	511945	68771.9	7313.96	153.051	1.3911	0.00624981
0.100122	1000000	513137	69543.6	7475.32	159.457	1.48472	0.00684716
0.100678	1000000	514321	70315.9	7638.52	166.059	1.58355	0.00749435
0.101233	1000000	515497	71088.7	7803.56	172.861	1.68782	0.00819491
0.101789	1000000	516664	71862.2	7970.42	179.866	1.79776	0.00895257
0.102344	1000000	517823	72636.1	8139.1	187.079	1.91359	0.00977127
0.1029	1000000	518974	73410.5	8309.59	194.503	2.03558	0.0106552
0.103456	1000000	520117	74185.3	8481.89	202.141	2.16397	0.0116087
0.104011	1000000	521252	74960.5	8655.99	209.997	2.29902	0.0126364
0.104567	1000000	522379	75736	8831.88	218.075	2.441	0.0137431
0.105122	1000000	523498	76511.9	9009.56	226.377	2.59017	0.0149341
0.105678	1000000	524610	77288	9189.01	234.907	2.74681	0.0162147
0.106233	1000000	525714	78064.4	9370.22	243.67	2.91122	0.0175905
0.106789	1000000	526811	78841	9553.2	252.668	3.08368	0.0190676
0.107344	1000000	527900	79617.7	9737.93	261.905	3.2645	0.0206521
0.1079	1000000	528982	80394.6	9924.41	271.384	3.45398	0.0223507
0.108456	1000000	530057	81171.7	10112.6	281.109	3.65244	0.0241701
0.109011	1000000	531125	81948.8	10302.6	291.084	3.8602	0.0261176
0.109567	1000000	532185	82725.9	10494.2	301.311	4.07758	0.0282007
0.110122	1000000	533239	83503.1	10687.6	311.795	4.30493	0.0304274
0.110678	1000000	534286	84280.2	10882.6	322.538	4.54259	0.0328057
0.111233	1000000	535325	85057.3	11079.4	333.544	4.7909	0.0353444
0.111789	1000000	536359	85834.4	11277.8	344.817	5.05024	0.0380525
0.112344	1000000	537385	86611.3	11478	356.359	5.32095	0.0409393
0.1129	1000000	538405	87388.1	11679.7	368.175	5.60342	0.0440146
0.113456	1000000	539418	88164.8	11883.2	380.267	5.89803	0.0472887
0.114011	1000000	540424	88941.3	12088.2	392.639	6.20517	0.0507722
0.114567	1000000	541425	89717.6	12295	405.294	6.52522	0.0544761
0.115122	1000000	542419	90493.6	12503.3	418.236	6.8586	0.0584121
0.115678	1000000	543406	91269.4	12713.3	431.467	7.20571	0.0625921
0.116233	1000000	544388	92044.9	12924.8	444.991	7.56697	0.0670285
0.116789	1000000	545363	92820.2	13138	458.812	7.94281	0.0717345
0.117344	1000000	546332	93595.1	13352.7	472.932	8.33366	0.0767233
0.1179	1000000	547295	94369.6	13569	487.354	8.73995	0.0820091
0.118456	1000000	548252	95143.8	13786.9	502.082	9.16214	0.0876063
0.119011	1000000	549203	95917.6	14006.4	517.119	9.60068	0.09353
0.119567	1000000	550149	96691	14227.4	532.468	10.056	0.0997958
0.120122	1000000	551088	97464	14449.9	548.132	10.5287	0.10642
0.120678	1000000	552022	98236.5	14674	564.115	11.019	0.113419
0.121233	1000000	552950	99008.5	14899.5	580.418	11.5277	0.120811
0.121789	1000000	553873	99780	15126.6	597.046	12.055	0.128612
0.122344	1000000	554790	100551	15355.2	614	12.6016	0.136843
0.1229	1000000	555701	101322	15585.2	631.285	13.168	0.145522
0.123456	1000000	556607	102092	15816.8	648.903	13.7545	0.154668
0.124011	1000000	557508	102861	16049.8	666.856	14.3619	0.164303
0.124567	1000000	558403	103630	16284.2	685.149	14.9905	0.174448
0.125122	1000000	559293	104398	16520.1	703.783	15.641	0.185124
0.125678	1000000	560177	105166	16757.4	722.762	16.3138	0.196353
0.126233	1000000	561057	105932	16996.2	742.088	17.0096	0.20816
0.126789	1000000	561931	106699	17236.3	761.763	17.7288	0.220568
0.127344	1000000	562800	107464	17477.9	781.792	18.472	0.233602
0.1279	1000000	563665	108229	17720.9	802.176	19.2399	0.247287
0.128456	1000000	564524	108994	17965.2	822.918	20.0329	0.261649
0.129011	1000000	565378	109757	18210.9	844.021	20.8517	0.276715
0.129567	1000000	566227	110520	18458	865.487	21.6968	0.292513
0.130122	1000000	567072	111282	18706.4	887.32	22.5688	0.309072
0.130678	1000000	567911	112043	18956.1	909.52	23.4684	0.326421
0.131233	1000000	568746	112804	19207.2	932.092	24.3961	0.344589
0.131789	1000000	569576	113564	19459.6	955.037	25.3526	0.363609
0.132344	1000000	570402	114323	19713.3	978.358	26.3384	0.38351
0.1329	1000000	571222	115081	19968.3	1002.06	27.3543	0.404328
0.133456	1000000	572038	115838	20224.6	1026.14	28.4008	0.426094
0.134011	1000000	572850	116595	20482.1	1050.6	29.4785	0.448843
0.134567	1000000	573657	117351	20740.9	1075.45	30.5882	0.47261
0.135122	1000000	574460	118106	21001	1100.69	31.7304	0.497432
0.135678	1000000	575258	118860	21262.3	1126.31	32.9058	0.523345
0.136233	1000000	576052	119613	21524.9	1152.33	34.1151	0.550388
0.136789	1000000	576841	120365	21788.7	1178.74	35.359	0.578599
0.137344	1000000	577626	121116	22053.7	1205.55	36.638	0.608019
0.1379	1000000	578407	121867	22319.9	1232.76	37.953	0.638687
0.138456	1000000	579184	122616	22587.2	1260.37	39.3045	0.670646
0.139011	1000000	579956	123365	22855.8	1288.38	40.6933	0.703938
0.139567	1000000	580724	124113	23125.5	1316.8	42.12	0.738607
0.140122	1000000	581488	124860	23396.4	1345.62	43.5854	0.774697
0.140678	1000000	582248	125605	23668.5	1374.85	45.0901	0.812255
0.141233	1000000	583004	126350	23941.7	1404.5	46.6348	0.851326
0.141789	1000000	583756	127094	24216	1434.55	48.2204	0.891959
0.142344	1000000	584504	127837	24491.4	1465.02	49.8474	0.934202
0.1429	1000000	585248	128579	24768	1495.91	51.5166	0.978104
0.143456	1000000	585988	129320	25045.6	1527.21	53.2288	1.02372
0.144011	1000000	586724	130060	25324.4	1558.94	54.9846	1.07109
0.144567	1000000	587456	130799	25604.2	1591.09	56.7848	1.12028
0.145122	1000000	588185	131537	25885.1	1623.66	58.6301	1.17134
0.145678	1000000	588910	132274	26167	1656.65	60.5214	1.22432
0.146233	1000000	589631	133010	26450	1690.07	62.4592	1.27928
0.146789	1000000	590348	133745	26734	1723.92	64.4444	1.33628
0.147344	1000000	591061	134478	27019.1	1758.2	66.4777	1.39537
0.1479	1000000	591771	135211	27305.2	1792.91	68.5599	1.45662
0.148456	1000000	592477	135943	27592.3	1828.06	70.6918	1.52008
0.149011	1000000	593180	136674	27880.4	1863.63	72.874	1.58581
0.149567	1000000	593879	137403	28169.5	1899.65	75.1075	1.65388
0.150122	1000000	594575	138132	28459.6	1936.1	77.3928	1.72436
0.150678	1000000	595267	138859	28750.6	1972.99	79.7309	1.7973
0.151233	1000000	595955	139586	29042.6	2010.32	82.1225	1.87277
0.151789	1000000	596640	140311	29335.6	2048.09	84.5684	1.95084
0.152344	1000000	597322	141035	29629.5	2086.31	87.0693	2.03158
0.1529	1000000	598000	141758	29924.3	2124.96	89.6261	2.11505
0.153456	1000000	598675	142480	30220.1	2164.07	92.2395	2.20133
0.154011	1000000	599346	143201	30516.8	2203.62	94.9103	2.29049
0.154567	1000000	600015	143921	30814.3	2243.61	97.6393	2.38259
0.155122	1000000	600680	144640	31112.8	2284.06	100.427	2.47772
0.155678	1000000	601341	145358	31412.2	2324.95	103.275	2.57595
0.156233	1000000	602000	146074	31712.4	2366.3	106.184	2.67735
0.156789	1000000	602655	146789	32013.5	2408.1	109.154	2.78201
0.157344	1000000	603307	147504	32315.5	2450.35	112.186	2.88999
0.1579	1000000	603956	148217	32618.4	2493.05	115.281	3.00138
0.158456	1000000	604601	148929	32922	2536.21	118.44	3.11627
0.159011	1000000	605244	149639	33226.5	2579.82	121.663	3.23472
0.159567	1000000	605884	150349	33531.9	2623.89	124.952	3.35682
0.160122	1000000	606520	151058	33838	2668.42	128.308	3.48267
0.160678	1000000	607154	151765	34145	2713.41	131.73	3.61234
0.161233	1000000	607784	152471	34452.7	2758.85	135.22	3.74591
0.161789	1000000	608411	153176	34761.2	2804.76	138.779	3.88348
0.162344	1000000	609036	153880	35070.6	2851.13	142.408	4.02514
0.1629	1000000	609657	154583	35380.7	2897.95	146.107	4.17097
0.163456	1000000	610276	155284	35691.5	2945.24	149.877	4.32106
0.164011	1000000	610892	155985	36003.1	2993	153.719	4.47551
0.164567	1000000	611504	156684	36315.5	3041.21	157.633	4.63442
0.165122	1000000	612114	157382	36628.6	3089.89	161.622	4.79786
0.165678	1000000	612721	158079	36942.4	3139.03	165.684	4.96594
0.166233	1000000	613326	158775	37257	3188.64	169.822	5.13876
0.166789	1000000	613927	159470	37572.2	3238.72	174.037	5.31641
0.167345	1000000	614526	160163	37888.2	3289.26	178.328	5.49899
0.1679	1000000	615122	160855	38204.9	3340.26	182.696	5.6866
0.168456	1000000	615715	161546	38522.2	3391.74	187.144	5.87935
0.169011	1000000	616306	162236	38840.3	3443.68	191.67	6.07732
0.169567	1000000	616894	162925	39159	3496.09	196.277	6.28064
0.170122	1000000	617479	163612	39478.3	3548.97	200.965	6.48939
0.170678	1000000	618061	164299	39798.4	3602.31	205.735	6.70369
0.171233	1000000	618641	164984	40119.1	3656.13	210.587	6.92363
0.171789	1000000	619219	165668	40440.4	3710.41	215.523	7.14934
0.172345	1000000	619793	166351	40762.4	3765.17	220.543	7.38092
0.1729	1000000	620365	167032	41084.9	3820.39	225.648	7.61847
0.173456	1000000	620935	167713	41408.1	3876.09	230.839	7.8621
0.174011	1000000	621502	168392	41732	3932.25	236.117	8.11193
0.174567	1000000	622067	169070	42056.4	3988.88	241.482	8.36808
0.175122	1000000	622629	169747	42381.4	4045.99	246.936	8.63065
0.175678	1000000	623188	170422	42707	4103.56	252.479	8.89975
0.176233	1000000	623745	171097	43033.2	4161.61	258.112	9.17551
0.176789	1000000	624300	171770	43360	4220.13	263.835	9.45804
0.177345	1000000	624852	172442	43687.3	4279.11	269.651	9.74746
0.1779	1000000	625402	173113	44015.2	4338.57	275.558	10.0439
0.178456	1000000	625949	173783	44343.6	4398.5	281.559	10.3474
0.179011	1000000	626495	174451	44672.6	4458.9	287.654	10.6582
0.179567	1000000	627037	175118	45002.1	4519.78	293.844	10.9764
0.180122	1000000	627578	175785	45332.2	4581.12	300.129	11.302
0.180678	1000000	628116	176450	45662.8	4642.93	306.511	11.6353
0.181233	1000000	628651	177113	45993.9	4705.22	312.99	11.9763
0.181789	1000000	629185	177776	46325.5	4767.97	319.568	12.3252
0.182345	1000000	629716	178437	46657.6	4831.2	326.243	12.682
0.1829	1000000	630245	179097	46990.2	4894.89	333.019	13.047
0.183456	1000000	630771	179756	47323.3	4959.06	339.895	13.4202
0.184011	1000000	631296	180414	47656.9	5023.7	346.872	13.8018
0.184567	1000000	631818	181071	47991	5088.8	353.951	14.1919
0.185122	1000000	632338	181726	48325.5	5154.38	361.133	14.5906
0.185678	1000000	632856	182380	48660.5	5220.42	368.418	14.9981
0.186233	1000000	633371	183033	48996	5286.94	375.808	15.4145
0.186789	1000000	633885	183685	49331.9	5353.92	383.303	15.8399
0.187345	1000000	634396	184336	49668.2	5421.37	390.904	16.2744
0.1879	1000000	634905	184985	50005	5489.29	398.611	16.7183
0.188456	1000000	635412	185634	50342.2	5557.68	406.426	17.1716
0.189011	1000000	635917	186281	50679.9	5626.54	414.348	17.6345
0.189567	1000000	636420	186927	51017.9	5695.86	422.38	18.107
0.190122	1000000	636921	187571	51356.4	5765.65	430.522	18.5895
0.190678	1000000	637420	188215	51695.3	5835.91	438.774	19.0818
0.191233	1000000	637917	188857	52034.6	5906.63	447.137	19.5844
0.191789	1000000	638411	189499	52374.2	5977.81	455.612	20.0971
0.192345	1000000	638904	190139	52714.3	6049.47	464.199	20.6203
0.1929	1000000	639395	190777	53054.7	6121.58	472.9	21.1541
0.193456	1000000	639883	191415	53395.6	6194.17	481.716	21.6985
0.194011	1000000	640370	192052	53736.8	6267.21	490.646	22.2537
0.194567	1000000	640855	192687	54078.3	6340.72	499.692	22.8199
0.195122	1000000	641338	193321	54420.3	6414.69	508.854	23.3972
0.195678	1000000	641819	193954	54762.5	6489.12	518.133	23.9858
0.196233	1000000	642298	194586	55105.2	6564.01	527.53	24.5858
0.196789	1000000	642775	195216	55448.1	6639.37	537.046	25.1973
0.197345	1000000	643250	195846	55791.4	6715.18	546.68	25.8206
0.1979	1000000	643723	196474	56135.1	6791.46	556.435	26.4557
0.198456	1000000	644194	197101	56479	6868.19	566.311	27.1027
0.199011	1000000	644664	197727	56823.3	6945.38	576.307	27.7619
0.199567	1000000	645132	198352	57167.9	7023.03	586.426	28.4334
0.200122	1000000	645598	198976	57512.8	7101.14	596.668	29.1174
0.200678	1000000	646062	199598	57858	7179.7	607.033	29.8139
0.201233	1000000	646524	200219	58203.5	7258.72	617.522	30.5232
0.201789	1000000	646984	200839	58549.3	7338.2	628.136	31.2453
0.202345	1000000	647443	201458	58895.4	7418.13	638.876	31.9805
0.2029	1000000	647900	202076	59241.8	7498.51	649.741	32.7289
0.203456	1000000	648355	202693	59588.4	7579.34	660.734	33.4906
0.204011	1000000	648808	203308	59935.4	7660.63	671.854	34.2659
0.204567	1000000	649259	203923	60282.5	7742.37	683.103	35.0548
0.205122	1000000	649709	204536	60630	7824.55	694.48	35.8574
0.205678	1000000	650157	205148	60977.7	7907.19	705.986	36.6741
0.206233	1000000	650604	205759	61325.7	7990.28	717.623	37.5048
0.206789	1000000	651048	206369	61673.9	8073.81	729.391	38.3498
0.207345	1000000	651491	206977	62022.3	8157.8	741.29	39.2093
0.2079	1000000	651933	207585	62371	8242.23	753.321	40.0833
0.208456	1000000	652372	208191	62720	8327.1	765.485	40.972
0.209011	1000000	652810	208797	63069.1	8412.42	777.783	41.8757
0.209567	1000000	653247	209401	63418.5	8498.18	790.214	42.7944
0.210122	1000000	653681	210004	63768.1	8584.39	802.78	43.7282
0.210678	1000000	654114	210605	64117.9	8671.04	815.481	44.6775
0.211233	1000000	654546	211206	64467.9	8758.13	828.318	45.6422
0.211789	1000000	654976	211806	64818.2	8845.66	841.292	46.6226
0.212345	1000000	655404	212404	65168.6	8933.62	854.402	47.6189
0.2129	1000000	655830	213001	65519.2	9022.03	867.65	48.6311
0.213456	1000000	656255	213598	65870.1	9110.88	881.037	49.6595
0.214011	1000000	656679	214193	66221.1	9200.16	894.562	50.7042
0.214567	1000000	657101	214787	66572.3	9289.88	908.227	51.7653
0.215122	1000000	657521	215379	66923.6	9380.03	922.031	52.8431
0.215678	1000000	657940	215971	67275.2	9470.61	935.977	53.9376
0.216233	1000000	658357	216562	67626.9	9561.63	950.063	55.0491
0.216789	1000000	658773	217151	67978.8	9653.08	964.291	56.1777
0.217345	1000000	659187	217740	68330.8	9744.96	978.662	57.3235
0.2179	1000000	659600	218327	68683	9837.27	993.175	58.4868
0.218456	1000000	660011	218913	69035.4	9930.01	1007.83	59.6676
0.219011	1000000	660421	219498	69387.9	10023.2	1022.63	60.8661
0.219567	1000000	660829	220082	69740.6	10116.8	1037.58	62.0826
0.220122	1000000	661236	220665	70093.3	10210.8	1052.67	63.3171
0.220678	1000000	661641	221247	70446.3	10305.2	1067.9	64.5698
0.221233	1000000	662045	221827	70799.3	10400.1	1083.29	65.8409
0.221789	1000000	662447	222407	71152.5	10495.4	1098.81	67.1305
0.222345	1000000	662848	222985	71505.9	10591.1	1114.49	68.4387
0.2229	1000000	663248	223562	71859.3	10687.2	1130.31	69.7659
0.223456	1000000	663646	224139	72212.9	10783.8	1146.28	71.112
0.224011	1000000	664043	224714	72566.6	10880.7	1162.4	72.4773
0.224567	1000000	664438	225288	72920.3	10978.1	1178.67	73.862
0.225122	1000000	664832	225861	73274.2	11075.9	1195.09	75.2661
0.225678	1000000	665224	226433	73628.2	11174.1	1211.66	76.6899
0.226233	1000000	665616	227003	73982.3	11272.8	1228.38	78.1334
0.226789	1000000	666005	227573	74336.5	11371.8	1245.25	79.597
0.227345	1000000	666394	228142	74690.8	11471.3	1262.28	81.0806
0.2279	1000000	666781	228709	75045.2	11571.1	1279.45	82.5846
0.228456	1000000	667166	229276	75399.6	11671.4	1296.78	84.1089
0.229011	1000000	667551	229841	75754.2	11772.1	1314.26	85.6539
0.229567	1000000	667934	230406	76108.8	11873.2	1331.89	87.2196
0.230122	1000000	668315	230969	76463.5	11974.7	1349.68	88.8062
0.230678	1000000	668696	231531	76818.3	12076.6	1367.62	90.4139
0.231233	1000000	669075	232092	77173.1	12178.9	1385.72	92.0429
0.231789	1000000	669453	232653	77528	12281.6	1403.97	93.6932
0.232345	1000000	669829	233212	77883	12384.7	1422.38	95.365
0.2329	1000000	670204	233770	78238	12488.2	1440.94	97.0586
0.233456	1000000	670578	234327	78593.1	12592.1	1459.66	98.774
0.234011	1000000	670951	234882	78948.2	12696.4	1478.54	100.511
0.234567	1000000	671322	235437	79303.4	12801.1	1497.57	102.271
0.235122	1000000	671692	235991	79658.6	12906.2	1516.77	104.053
0.235678	1000000	672061	236544	80013.8	13011.6	1536.12	105.857
0.236233	1000000	672429	237096	80369.1	13117.5	1555.63	107.684
0.236789	1000000	672795	237646	80724.5	13223.8	1575.29	109.534
0.237345	1000000	673160	238196	81079.8	13330.4	1595.12	111.407
0.2379	1000000	673524	238745	81435.2	13437.5	1615.11	113.303
0.238456	1000000	673887	239292	81790.7	13544.9	1635.26	115.222
0.239011	1000000	674248	239839	82146.1	13652.7	1655.56	117.164
0.239567	1000000	674608	240384	82501.6	13761	1676.03	119.13
0.240122	1000000	674967	240929	82857.1	13869.5	1696.66	121.12
0.240678	1000000	675325	241472	83212.6	13978.5	1717.46	123.134
0.241233	1000000	675682	242015	83568.1	14087.9	1738.41	125.171
0.241789	1000000	676037	242556	83923.6	14197.6	1759.52	127.233
0.242345	1000000	676392	243097	84279.1	14307.7	1780.8	129.319
0.2429	1000000	676745	243636	84634.6	14418.2	1802.25	131.43
0.243456	1000000	677097	244174	84990.2	14529.1	1823.85	133.565
0.244011	1000000	677448	244712	85345.7	14640.3	1845.62	135.725
0.244567	1000000	677797	245248	85701.2	14752	1867.55	137.91
0.245122	1000000	678146	245783	86056.7	14864	1889.65	140.12
0.245678	1000000	678493	246318	86412.2	14976.3	1911.91	142.355
0.246233	1000000	678840	246851	86767.7	15089.1	1934.34	144.616
0.246789	1000000	679185	247383	87123.2	15202.2	1956.93	146.902
0.247345	1000000	679529	247915	87478.7	15315.6	1979.68	149.214
0.2479	1000000	679872	248445	87834.1	15429.5	2002.61	151.551
0.248456	1000000	680214	248974	88189.5	15543.7	2025.7	153.915
0.249011	1000000	680554	249503	88544.9	15658.2	2048.95	156.304
0.249567	1000000	680894	250030	88900.2	15773.2	2072.37	158.72
0.250122	1000000	681233	250556	89255.6	15888.5	2095.96	161.162
0.250678	1000000	681570	251082	89610.9	16004.1	2119.72	163.631
0.251233	1000000	681906	251606	89966.1	16120.1	2143.64	166.126
0.251789	1000000	682242	252130	90321.3	16236.5	2167.74	168.649
0.252345	1000000	682576	252652	90676.5	16353.2	2191.99	171.198
0.2529	1000000	682909	253173	91031.6	16470.3	2216.42	173.774
0.253456	1000000	683241	253694	91386.7	16587.7	2241.02	176.377
0.254011	1000000	683572	254214	91741.7	16705.5	2265.78	179.008
0.254567	1000000	683902	254732	92096.7	16823.7	2290.72	181.667
0.255122	1000000	684231	255250	92451.7	16942.2	2315.82	184.353
0.255678	1000000	684559	255766	92806.5	17061	2341.1	187.067
0.256233	1000000	684886	256282	93161.4	17180.2	2366.54	189.808
0.256789	1000000	685212	256797	93516.1	17299.7	2392.15	192.578
0.257345	1000000	685537	257311	93870.8	17419.6	2417.94	195.376
0.2579	1000000	685861	257824	94225.4	17539.8	2443.89	198.203
0.258456	1000000	686184	258336	94580	17660.4	2470.01	201.057
0.259011	1000000	686506	258847	94934.5	17781.3	2496.31	203.941
0.259567	1000000	686827	259357	95288.9	17902.5	2522.77	206.853
0.260122	1000000	687147	259866	95643.3	18024.1	2549.41	209.794
0.260678	1000000	687465	260374	95997.6	18146	2576.22	212.764
0.261233	1000000	687783	260881	96351.8	18268.3	2603.2	215.764
0.261789	1000000	688100	261387	96705.9	18390.9	2630.35	218.792
0.262345	1000000	688416	261893	97060	18513.8	2657.67	221.85
0.2629	1000000	688731	262397	97413.9	18637.1	2685.17	224.937
0.263456	1000000	689045	262901	97767.8	18760.6	2712.84	228.055
0.264011	1000000	689359	263403	98121.6	18884.6	2740.68	231.201
0.264567	1000000	689671	263905	98475.3	19008.8	2768.69	234.378
0.265122	1000000	689982	264405	98828.9	19133.4	2796.88	237.585
0.265678	1000000	690292	264905	99182.4	19258.3	2825.24	240.822
0.266233	1000000	690601	265404	99535.8	19383.5	2853.77	244.089
0.266789	1000000	690910	265902	99889.2	19509	2882.47	247.387
0.267345	1000000	691217	266399	100242	19634.9	2911.35	250.716
0.2679	1000000	691524	266895	100596	19761.1	2940.4	254.074
0.268456	1000000	691829	267391	100949	19887.6	2969.63	257.464
0.269011	1000000	692134	267885	101301	20014.4	2999.03	260.885
0.269567	1000000	692438	268379	101654	20141.5	3028.6	264.337
0.270122	1000000	692741	268871	102007	20269	3058.35	267.819
0.270678	1000000	693043	269363	102360	20396.8	3088.27	271.333
0.271233	1000000	693344	269854	102712	20524.8	3118.37	274.879
0.271789	1000000	693644	270343	103064	20653.2	3148.64	278.456
0.272345	1000000	693944	270832	103417	20781.9	3179.08	282.064
0.2729	1000000	694242	271320	103769	20910.9	3209.7	285.705
0.273456	1000000	694540	271808	104121	21040.2	3240.49	289.377
0.274011	1000000	694836	272294	104473	21169.9	3271.46	293.081
0.274567	1000000	695132	272779	104825	21299.8	3302.6	296.817
0.275122	1000000	695427	273264	105176	21430	3333.92	300.586
0.275678	1000000	695721	273747	105528	21560.6	3365.41	304.387
0.276233	1000000	696014	274230	105879	21691.4	3397.08	308.22
0.276789	1000000	696307	274712	106230	21822.5	3428.92	312.085
0.277345	1000000	696598	275193	106582	21954	3460.94	315.984
0.2779	1000000	696889	275673	106933	22085.7	3493.13	319.915
0.278456	1000000	697179	276152	107284	22217.7	3525.5	323.879
0.279011	1000000	697468	276631	107634	22350.1	3558.05	327.876
0.279567	1000000	697756	277108	107985	22482.7	3590.76	331.905
0.280122	1000000	698043	277585	108335	22615.6	3623.66	335.969
0.280678	1000000	698330	278061	108686	22748.8	3656.73	340.065
0.281233	1000000	698615	278536	109036	22882.3	3689.97	344.195
0.281789	1000000	698900	279010	109386	23016	3723.39	348.358
0.282345	1000000	699184	279483	109736	23150.1	3756.99	352.555
0.2829	1000000	699468	279956	110086	23284.5	3790.76	356.785
0.283456	1000000	699750	280427	110435	23419.1	3824.71	361.049
0.284011	1000000	700032	280898	110785	23554	3858.83	365.348
0.284567	1000000	700312	281368	111134	23689.2	3893.13	369.68
0.285122	1000000	700593	281837	111483	23824.7	3927.61	374.046
0.285678	1000000	700872	282305	111832	23960.4	3962.26	378.446
0.286233	1000000	701150	282773	112181	24096.5	3997.08	382.881
0.286789	1000000	701428	283239	112530	24232.8	4032.08	387.35
0.287345	1000000	701705	283705	112879	24369.4	4067.26	391.853
0.2879	1000000	701981	284170	113227	24506.3	4102.61	396.391
0.288456	1000000	702256	284634	113575	24643.4	4138.14	400.964
0.289011	1000000	702531	285097	113923	24780.8	4173.85	405.571
0.289567	1000000	702805	285560	114271	24918.5	4209.73	410.213
0.290122	1000000	703078	286021	114619	25056.4	4245.78	414.891
0.290678	1000000	703350	286482	114967	25194.7	4282.01	419.603
0.291233	1000000	703622	286942	115314	25333.2	4318.42	424.35
0.291789	1000000	703892	287401	115661	25471.9	4355	429.132
0.292345	1000000	704163	287859	116009	25610.9	4391.76	433.95
0.2929	1000000	704432	288317	116356	25750.2	4428.69	438.803
0.293456	1000000	704700	288774	116702	25889.8	4465.8	443.691
0.294011	1000000	704968	289230	117049	26029.6	4503.08	448.615
0.294567	1000000	705235	289685	117395	26169.6	4540.54	453.575
0.295122	1000000	705502	290139	117742	26309.9	4578.18	458.57
0.295678	1000000	705767	290593	118088	26450.5	4615.99	463.601
0.296233	1000000	706032	291045	118434	26591.4	4653.97	468.668
0.296789	1000000	706296	291497	118779	26732.5	4692.13	473.771
0.297345	1000000	706560	291948	119125	26873.8	4730.47	478.909
0.2979	1000000	706823	292399	119470	27015.4	4768.97	484.084
0.298456	1000000	707085	292848	119816	27157.2	4807.66	489.295
0.299011	1000000	707346	293297	120161	27299.3	4846.52	494.542
0.299567	1000000	707607	293745	120506	27441.7	4885.55	499.826
0.300122	1000000	707867	294192	120850	27584.3	4924.76	505.146
0.300678	1000000	708126	294638	121195	27727.1	4964.15	510.502
0.301233	1000000	708384	295084	121539	27870.2	5003.71	515.895
0.301789	1000000	708642	295529	121883	28013.6	5043.44	521.324
0.302345	1000000	708899	295972	122227	28157.1	5083.34	526.79
0.3029	1000000	709156	296416	122571	28300.9	5123.43	532.293
0.303456	1000000	709412	296858	122914	28445	5163.68	537.832
0.304011	1000000	709667	297300	123258	28589.3	5204.11	543.409
0.304567	1000000	709921	297741	123601	28733.8	5244.71	549.022
0.305122	1000000	710175	298181	123944	28878.6	5285.49	554.673
0.305678	1000000	710428	298620	124287	29023.6	5326.44	560.36
0.306233	1000000	710680	299059	124629	29168.9	5367.57	566.085
0.306789	1000000	710932	299496	124972	29314.3	5408.87	571.846
0.307345	1000000	711183	299933	125314	29460	5450.34	577.645
0.3079	1000000	711434	300370	125656	29606	5491.98	583.482
0.308456	1000000	711683	300805	125998	29752.1	5533.8	589.355
0.309011	1000000	711932	301240	126340	29898.5	5575.79	595.266
0.309567	1000000	712181	301674	126681	30045.2	5617.96	601.215
0.310122	1000000	712429	302107	127022	30192	5660.29	607.201
0.310678	1000000	712676	302540	127363	30339.1	5702.8	613.225
0.311233	1000000	712922	302971	127704	30486.4	5745.49	619.286
0.311789	1000000	713168	303402	128045	30633.9	5788.34	625.385
0.312345	1000000	713414	303833	128385	30781.7	5831.37	631.522
0.3129	1000000	713658	304262	128726	30929.6	5874.57	637.697
0.313456	1000000	713902	304691	129066	31077.8	5917.94	643.909
0.314011	1000000	714146	305119	129405	31226.2	5961.48	650.16
0.314567	1000000	714388	305546	129745	31374.9	6005.19	656.448
0.315122	1000000	714630	305973	130084	31523.7	6049.08	662.774
0.315678	1000000	714872	306399	130424	31672.7	6093.13	669.139
0.316233	1000000	715113	306824	130763	31822	6137.36	675.541
0.316789	1000000	715353	307248	131101	31971.5	6181.76	681.982
0.317345	1000000	715593	307672	131440	32121.2	6226.33	688.461
0.3179	1000000	715832	308095	131778	32271.1	6271.07	694.978
0.318456	1000000	716070	308517	132117	32421.2	6315.98	701.534
0.319011	1000000	716308	308939	132455	32571.5	6361.07	708.128
0.319567	1000000	716545	309359	132792	32722.1	6406.32	714.76
0.320122	1000000	716782	309779	133130	32872.8	6451.74	721.431
0.320678	1000000	717018	310199	133467	33023.7	6497.33	728.14
0.321233	1000000	717253	310617	133804	33174.9	6543.09	734.888
0.321789	1000000	717488	311035	134141	33326.2	6589.02	741.674
0.322345	1000000	717722	311453	134478	33477.8	6635.12	748.499
0.3229	1000000	717956	311869	134814	33629.5	6681.39	755.362
0.323456	1000000	718189	312285	135151	33781.5	6727.83	762.264
0.324011	1000000	718422	312700	135487	33933.6	6774.43	769.205
0.324567	1000000	718653	313114	135823	34086	6821.21	776.185
0.325122	1000000	718885	313528	136158	34238.5	6868.15	783.203
0.325678	1000000	719116	313941	136494	34391.2	6915.26	790.26
0.326233	1000000	719346	314353	136829	34544.2	6962.54	797.356
0.326789	1000000	719575	314765	137164	34697.3	7009.99	804.491
0.327345	1000000	719804	315176	137498	34850.6	7057.6	811.664
0.3279	1000000	720033	315586	137833	35004.1	7105.38	818.877
0.328456	1000000	720261	315996	138167	35157.8	7153.33	826.128
0.329011	1000000	720488	316404	138501	35311.7	7201.45	833.419
0.329567	1000000	720715	316813	138835	35465.8	7249.73	840.748
0.330122	1000000	720941	317220	139169	35620	7298.18	848.117
0.330678	1000000	721167	317627	139502	35774.5	7346.79	855.525
0.331233	1000000	721392	318033	139835	35929.1	7395.57	862.971
0.331789	1000000	721617	318438	140168	36083.9	7444.52	870.457
0.332345	1000000	721841	318843	140501	36238.9	7493.63	877.982
0.3329	1000000	722064	319247	140834	36394.1	7542.91	885.546
0.333456	1000000	722287	319650	141166	36549.5	7592.35	893.149
0.334011	1000000	722510	320053	141498	36705	7641.96	900.792
0.334567	1000000	722731	320455	141830	36860.7	7691.73	908.474
0.335122	1000000	722953	320857	142161	37016.6	7741.67	916.195
0.335678	1000000	723174	321257	142493	37172.7	7791.77	923.955
0.336233	1000000	723394	321657	142824	37329	7842.03	931.754
0.336789	1000000	723614	322057	143155	37485.4	7892.46	939.593
0.337345	1000000	723833	322455	143485	37642	7943.05	947.471
0.3379	1000000	724051	322853	143816	37798.7	7993.8	955.388
0.338456	1000000	724270	323251	144146	37955.7	8044.72	963.345
0.339011	1000000	724487	323647	144476	38112.8	8095.8	971.341
0.339567	1000000	724704	324043	144806	38270.1	8147.04	979.377
0.340122	1000000	724921	324439	145135	38427.5	8198.45	987.451
0.340678	1000000	725137	324834	145465	38585.1	8250.02	995.566
0.341233	1000000	725353	325228	145794	38742.9	8301.74	1003.72
0.341789	1000000	725568	325621	146123	38900.9	8353.63	1011.91
0.342345	1000000	725782	326014	146451	39059	8405.68	1020.14
0.3429	1000000	725996	326406	146780	39217.3	8457.9	1028.42
0.343456	1000000	726210	326798	147108	39375.7	8510.27	1036.73
0.344011	1000000	726423	327188	147436	39534.3	8562.8	1045.08
0.344567	1000000	726636	327579	147763	39693	8615.5	1053.47
0.345122	1000000	726848	327968	148091	39852	8668.35	1061.9
0.345678	1000000	727059	328357	148418	40011	8721.36	1070.37
0.346233	1000000	727270	328745	148745	40170.3	8774.53	1078.88
0.346789	1000000	727481	329133	149072	40329.7	8827.86	1087.42
0.347345	1000000	727691	329520	149398	40489.2	8881.35	1096.01
0.3479	1000000	727900	329906	149724	40648.9	8935	1104.64
0.348456	1000000	728109	330292	150051	40808.8	8988.81	1113.3
0.349011	1000000	728318	330677	150376	40968.8	9042.77	1122.01
0.349567	1000000	728526	331062	150702	41128.9	9096.89	1130.76
0.350122	1000000	728734	331446	151027	41289.3	9151.17	1139.54
0.350678	1000000	728941	331829	151352	41449.7	9205.61	1148.37
0.351233	1000000	729148	332212	151677	41610.3	9260.2	1157.23
0.351789	1000000	729354	332594	152002	41771.1	9314.95	1166.13
0.352345	1000000	729560	332975	152326	41932	9369.86	1175.08
0.3529	1000000	729765	333356	152650	42093	9424.92	1184.06
0.353456	1000000	729970	333736	152974	42254.2	9480.14	1193.08
0.354011	1000000	730174	334116	153298	42415.6	9535.51	1202.14
0.354567	1000000	730378	334495	153621	42577.1	9591.04	1211.24
0.355122	1000000	730581	334873	153944	42738.7	9646.73	1220.38
0.355678	1000000	730784	335251	154267	42900.5	9702.56	1229.56
0.356233	1000000	730987	335628	154590	43062.4	9758.56	1238.78
0.356789	1000000	731189	336004	154912	43224.4	9814.7	1248.04
0.357345	1000000	731390	336380	155235	43386.6	9871	1257.33
0.3579	1000000	731591	336756	155557	43548.9	9927.46	1266.67
0.358456	1000000	731792	337130	155878	43711.4	9984.06	1276.05
0.359011	1000000	731992	337504	156200	43874	10040.8	1285.46
0.359567	1000000	732192	337878	156521	44036.7	10097.7	1294.92
0.360122	1000000	732391	338251	156842	44199.6	10154.8	1304.41
0.360678	1000000	732590	338623	157163	44362.6	10212	1313.95
0.361233	1000000	732788	338995	157483	44525.8	10269.4	1323.52
0.361789	1000000	732986	339366	157804	44689	10326.9	1333.13
0.362345	1000000	733184	339736	158124	44852.4	10384.6	1342.78
0.3629	1000000	733381	340106	158443	45016	10442.4	1352.47
0.363456	1000000	733577	340476	158763	45179.6	10500.4	1362.2
0.364011	1000000	733774	340844	159082	45343.4	10558.5	1371.97
0.364567	1000000	733969	341213	159401	45507.3	10616.7	1381.78
0.365122	1000000	734165	341580	159720	45671.4	10675.2	1391.63
0.365678	1000000	734360	341947	160039	45835.5	10733.7	1401.52
0.366233	1000000	734554	342314	160357	45999.8	10792.5	1411.44
0.366789	1000000	734748	342680	160675	46164.2	10851.3	1421.41
0.367345	1000000	734942	343045	160993	46328.8	10910.3	1431.41
0.3679	1000000	735135	343409	161310	46493.4	10969.5	1441.46
0.368456	1000000	735328	343774	161628	46658.2	11028.8	1451.54
0.369011	1000000	735520	344137	161945	46823.1	11088.3	1461.66
0.369567	1000000	735712	344500	162262	46988.1	11147.9	1471.82
0.370122	1000000	735903	344862	162578	47153.3	11207.6	1482.02
0.370678	1000000	736094	345224	162895	47318.5	11267.5	1492.26
0.371233	1000000	736285	345586	163211	47483.9	11327.6	1502.54
0.371789	1000000	736475	345946	163527	47649.4	11387.7	1512.85
0.372345	1000000	736665	346306	163842	47815	11448.1	1523.21
0.3729	1000000	736854	346666	164158	47980.7	11508.6	1533.6
0.373456	1000000	737043	347025	164473	48146.6	11569.2	1544.03
0.374011	1000000	737232	347384	164788	48312.5	11629.9	1554.51
0.374567	1000000	737420	347741	165102	48478.6	11690.9	1565.02
0.375122	1000000	737608	348099	165417	48644.8	11751.9	1575.56
0.375678	1000000	737795	348456	165731	48811	11813.1	1586.15
0.376233	1000000	737982	348812	166045	48977.4	11874.4	1596.78
0.376789	1000000	738169	349168	166359	49143.9	11935.9	1607.44
0.377345	1000000	738355	349523	166672	49310.5	11997.6	1618.15
0.3779	1000000	738541	349877	166985	49477.3	12059.3	1628.89
0.378456	1000000	738726	350231	167298	49644.1	12121.2	1639.67
0.379011	1000000	738911	350585	167611	49811	12183.3	1650.49
0.379567	1000000	739096	350938	167923	49978.1	12245.5	1661.35
0.380122	1000000	739280	351290	168235	50145.2	12307.8	1672.25
0.380678	1000000	739463	351642	168547	50312.4	12370.3	1683.18
0.381233	1000000	739647	351993	168859	50479.8	12432.9	1694.15
0.381789	1000000	739830	352344	169170	50647.2	12495.6	1705.17
0.382345	1000000	740012	352694	169481	50814.8	12558.5	1716.22
0.3829	1000000	740195	353044	169792	50982.4	12621.6	1727.3
0.383456	1000000	740377	353393	170103	51150.2	12684.7	1738.43
0.384011	1000000	740558	353742	170414	51318	12748	1749.6
0.384567	1000000	740739	354090	170724	51486	12811.5	1760.8
0.385122	1000000	740920	354437	171034	51654	12875.1	1772.04
0.385678	1000000	741100	354784	171343	51822.2	12938.8	1783.32
0.386233	1000000	741280	355131	171653	51990.4	13002.6	1794.64
0.386789	1000000	741460	355477	171962	52158.7	13066.6	1805.99
0.387345	1000000	741639	355822	172271	52327.2	13130.8	1817.38
0.3879	1000000	741818	356167	172580	52495.7	13195	1828.81
0.388456	1000000	741996	356511	172888	52664.3	13259.4	1840.28
0.389011	1000000	742174	356855	173196	52833	13324	1851.79
0.389567	1000000	742352	357198	173504	53001.8	13388.6	1863.33
0.390122	1000000	742529	357541	173812	53170.7	13453.4	1874.92
0.390678	1000000	742706	357883	174119	53339.7	13518.4	1886.54
0.391233	1000000	742883	358225	174427	53508.7	13583.4	1898.19
0.391789	1000000	743059	358566	174734	53677.9	13648.7	1909.89
0.392345	1000000	743235	358907	175040	53847.1	13714	1921.62
0.3929	1000000	743410	359247	175347	54016.4	13779.5	1933.39
0.393456	1000000	743585	359587	175653	54185.9	13845.1	1945.2
0.394011	1000000	743760	359926	175959	54355.4	13910.8	1957.05
0.394567	1000000	743934	360265	176265	54524.9	13976.7	1968.93
0.395122	1000000	744108	360603	176570	54694.6	14042.7	1980.85
0.395678	1000000	744282	360940	176875	54864.4	14108.8	1992.81
0.396233	1000000	744456	361278	177180	55034.2	14175.1	2004.8
0.396789	1000000	744629	361614	177485	55204.1	14241.5	2016.83
0.397345	1000000	744801	361950	177790	55374.1	14308	2028.9
0.3979	1000000	744973	362286	178094	55544.2	14374.6	2041.01
0.398456	1000000	745145	362621	178398	55714.3	14441.4	2053.15
0.399011	1000000	745317	362955	178701	55884.6	14508.3	2065.33
0.399567	1000000	745488	363289	179005	56054.9	14575.4	2077.55
0.400122	1000000	745659	363623	179308	56225.3	14642.5	2089.8
0.400678	1000000	745830	363956	179611	56395.8	14709.8	2102.09
0.401233	1000000	746000	364289	179914	56566.3	14777.2	2114.42
0.401789	1000000	746170	364621	180216	56736.9	14844.8	2126.78
0.402345	1000000	746339	364952	180519	56907.6	14912.5	2139.18
0.4029	1000000	746508	365283	180821	57078.4	14980.3	2151.62
0.403456	1000000	746677	365614	181122	57249.2	15048.2	2164.1
0.404011	1000000	746846	365944	181424	57420.2	15116.2	2176.61
0.404567	1000000	747014	366274	181725	57591.2	15184.4	2189.15
0.405122	1000000	747182	366603	182026	57762.2	15252.7	2201.74
0.405678	1000000	747349	366931	182327	57933.3	15321.1	2214.36
0.406233	1000000	747516	367259	182627	58104.5	15389.7	2227.01
0.406789	1000000	747683	367587	182928	58275.8	15458.4	2239.71
0.407345	1000000	747850	367914	183228	58447.2	15527.2	2252.44
0.4079	1000000	748016	368241	183527	58618.6	15596.1	2265.2
0.408456	1000000	748182	368567	183827	58790	15665.1	2278
0.409011	1000000	748347	368893	184126	58961.6	15734.3	2290.84
0.409567	1000000	748512	369218	184425	59133.2	15803.6	2303.71
0.410122	1000000	748677	369543	184724	59304.9	15873	2316.62
0.410678	1000000	748842	369867	185022	59476.6	15942.5	2329.57
0.411233	1000000	749006	370191	185321	59648.4	16012.2	2342.55
0.411789	1000000	749170	370514	185619	59820.3	16082	2355.56
0.412345	1000000	749333	370837	185916	59992.2	16151.9	2368.61
0.4129	1000000	749497	371159	186214	60164.2	16221.9	2381.7
0.413456	1000000	749659	371481	186511	60336.3	16292	2394.83
0.414011	1000000	749822	371802	186808	60508.4	16362.3	2407.98
0.414567	1000000	749984	372123	187105	60680.6	16432.6	2421.18
0.415122	1000000	750146	372444	187402	60852.8	16503.1	2434.41
0.415678	1000000	750308	372763	187698	61025.1	16573.7	2447.67
0.416233	1000000	750469	373083	187994	61197.5	16644.5	2460.97
0.416789	1000000	750630	373402	188290	61369.9	16715.3	2474.31
0.417345	1000000	750791	373721	188585	61542.4	16786.3	2487.68
0.4179	1000000	750951	374039	188880	61714.9	16857.3	2501.08
0.418456	1000000	751111	374356	189175	61887.5	16928.5	2514.53
0.419011	1000000	751271	374674	189470	62060.1	16999.8	2528
0.419567	1000000	751431	374990	189765	62232.8	17071.3	2541.51
0.420122	1000000	751590	375306	190059	62405.6	17142.8	2555.06
0.420678	1000000	751749	375622	190353	62578.4	17214.5	2568.64
0.421233	1000000	751907	375938	190647	62751.2	17286.2	2582.25
0.421789	1000000	752065	376252	190941	62924.1	17358.1	2595.9
0.422345	1000000	752223	376567	191234	63097.1	17430.1	2609.58
0.4229	1000000	752381	376881	191527	63270.1	17502.2	2623.3
0.423456	1000000	752538	377194	191820	63443.2	17574.5	2637.06
0.424011	1000000	752695	377507	192112	63616.3	17646.8	2650.84
0.424567	1000000	752852	377820	192405	63789.4	17719.2	2664.66
0.425122	1000000	753008	378132	192697	63962.7	17791.8	2678.52
0.425678	1000000	753165	378444	192989	64135.9	17864.5	2692.41
0.426233	1000000	753320	378755	193280	64309.2	17937.3	2706.33
0.426789	1000000	753476	379066	193572	64482.6	18010.2	2720.29
0.427345	1000000	753631	379376	193863	64656	18083.2	2734.28
0.4279	1000000	753786	379686	194154	64829.4	18156.3	2748.31
0.428456	1000000	753941	379996	194444	65002.9	18229.5	2762.37
0.429011	1000000	754095	380305	194734	65176.5	18302.8	2776.46
0.429567	1000000	754249	380613	195025	65350.1	18376.3	2790.59
0.430122	1000000	754403	380922	195314	65523.7	18449.8	2804.75
0.430678	1000000	754557	381229	195604	65697.4	18523.5	2818.95
0.431233	1000000	754710	381537	195894	65871.1	18597.3	2833.18
0.431789	1000000	754863	381843	196183	66044.8	18671.1	2847.44
0.432345	1000000	755015	382150	196472	66218.6	18745.1	2861.73
0.4329	1000000	755168	382456	196760	66392.5	18819.2	2876.06
0.433456	1000000	755320	382761	197049	66566.4	18893.4	2890.42
0.434011	1000000	755472	383066	197337	66740.3	18967.7	2904.82
0.434567	1000000	755623	383371	197625	66914.2	19042.1	2919.24
0.435122	1000000	755774	383675	197912	67088.2	19116.7	2933.7
0.435678	1000000	755925	383979	198200	67262.3	19191.3	2948.2
0.436233	1000000	756076	384283	198487	67436.4	19266	2962.72
0.436789	1000000	756226	384586	198774	67610.5	19340.8	2977.28
0.437345	1000000	756376	384888	199061	67784.6	19415.8	2991.88
0.4379	1000000	756526	385190	199347	67958.8	19490.8	3006.5
0.438456	1000000	756676	385492	199633	68133	19565.9	3021.16
0.439011	1000000	756825	385793	199919	68307.3	19641.2	3035.85
0.439567	1000000	756974	386094	200205	68481.6	19716.5	3050.57
0.440122	1000000	757123	386394	200490	68655.9	19792	3065.32
0.440678	1000000	757271	386694	200776	68830.3	19867.5	3080.11
0.441233	1000000	757419	386994	201061	69004.6	19943.2	3094.93
0.441789	1000000	757567	387293	201345	69179.1	20018.9	3109.78
0.442345	1000000	757715	387592	201630	69353.5	20094.8	3124.66
0.4429	1000000	757862	387890	201914	69528	20170.7	3139.58
0.443456	1000000	758009	388188	202198	69702.5	20246.8	3154.53
0.444011	1000000	758156	388485	202482	69877.1	20323	3169.51
0.444567	1000000	758303	388782	202765	70051.7	20399.2	3184.52
0.445122	1000000	758449	389079	203049	70226.3	20475.6	3199.56
0.445678	1000000	758595	389375	203332	70400.9	20552	3214.64
0.446233	1000000	758741	389671	203615	70575.6	20628.6	3229.74
0.446789	1000000	758886	389966	203897	70750.3	20705.2	3244.88
0.447345	1000000	759031	390261	204179	70925	20782	3260.05
0.4479	1000000	759176	390556	204462	71099.7	20858.8	3275.25
0.448456	1000000	759321	390850	204743	71274.5	20935.7	3290.48
0.449011	1000000	759466	391144	205025	71449.3	21012.8	3305.74
0.449567	1000000	759610	391437	205306	71624.2	21089.9	3321.04
0.450122	1000000	759754	391730	205587	71799	21167.1	3336.36
0.450678	1000000	759897	392022	205868	71973.9	21244.5	3351.72
0.451233	1000000	760041	392314	206149	72148.8	21321.9	3367.1
0.451789	1000000	760184	392606	206429	72323.7	21399.4	3382.52
0.452345	1000000	760327	392897	206709	72498.7	21477	3397.97
0.4529	1000000	760469	393188	206989	72673.6	21554.7	3413.45
0.453456	1000000	760612	393479	207269	72848.6	21632.5	3428.96
0.454011	1000000	760754	393769	207549	73023.6	21710.4	3444.5
0.454567	1000000	760896	394059	207828	73198.7	21788.4	3460.07
0.455122	1000000	761037	394348	208107	73373.7	21866.5	3475.67
0.455678	1000000	761179	394637	208385	73548.8	21944.6	3491.3
0.456233	1000000	761320	394925	208664	73723.9	22022.9	3506.96
0.456789	1000000	761461	395213	208942	73899	22101.2	3522.66
0.457345	1000000	761601	395501	209220	74074.1	22179.7	3538.38
0.4579	1000000	761742	395788	209498	74249.3	22258.2	3554.13
0.458456	1000000	761882	396075	209775	74424.5	22336.8	3569.91
0.459011	1000000	762022	396362	210053	74599.6	22415.5	3585.72
0.459567	1000000	762161	396648	210330	74774.9	22494.3	3601.56
0.460122	1000000	762301	396934	210607	74950.1	22573.2	3617.43
0.460678	1000000	762440	397219	210883	75125.3	22652.2	3633.34
0.461233	1000000	762579	397504	211159	75300.6	22731.3	3649.27
0.461789	1000000	762718	397789	211435	75475.8	22810.4	3665.22
0.462345	1000000	762856	398073	211711	75651.1	22889.7	3681.21
0.4629	1000000	762994	398357	211987	75826.4	22969	3697.23
0.463456	1000000	763132	398640	212262	76001.7	23048.5	3713.28
0.464011	1000000	763270	398923	212537	76177	23128	3729.36
0.464567	1000000	763407	399206	212812	76352.4	23207.6	3745.46
0.465122	1000000	763544	399488	213087	76527.7	23287.2	3761.6
0.465678	1000000	763681	399770	213362	76703.1	23367	3777.76
0.466233	1000000	763818	400052	213636	76878.5	23446.9	3793.95
0.466789	1000000	763955	400333	213910	77053.8	23526.8	3810.17
0.467345	1000000	764091	400613	214183	77229.2	23606.8	3826.42
0.4679	1000000	764227	400894	214457	77404.6	23686.9	3842.7
0.468456	1000000	764363	401174	214730	77580.1	23767.1	3859.01
0.469011	1000000	764498	401453	215003	77755.5	23847.4	3875.34
0.469567	1000000	764634	401733	215276	77930.9	23927.8	3891.71
0.470122	1000000	764769	402012	215548	78106.4	24008.2	3908.1
0.470678	1000000	764904	402290	215821	78281.8	24088.7	3924.52
0.471233	1000000	765038	402568	216093	78457.3	24169.4	3940.97
0.471789	1000000	765173	402846	216365	78632.7	24250	3957.45
0.472345	1000000	765307	403123	216636	78808.2	24330.8	3973.95
0.4729	1000000	765441	403400	216908	78983.7	24411.7	3990.48
0.473456	1000000	765574	403677	217179	79159.2	24492.6	4007.04
0.474011	1000000	765708	403953	217450	79334.6	24573.6	4023.63
0.474567	1000000	765841	404229	217720	79510.1	24654.7	4040.25
0.475122	1000000	765974	404505	217991	79685.6	24735.9	4056.89
0.475678	1000000	766107	404780	218261	79861.1	24817.2	4073.56
0.476233	1000000	766240	405055	218531	80036.6	24898.5	4090.26
0.476789	1000000	766372	405329	218801	80212.2	24979.9	4106.98
0.477345	1000000	766504	405603	219070	80387.7	25061.4	4123.73
0.4779	1000000	766636	405877	219340	80563.2	25143	4140.51
0.478456	1000000	766768	406150	219609	80738.7	25224.6	4157.32
0.479011	1000000	766899	406423	219877	80914.2	25306.4	4174.15
0.479567	1000000	767030	406696	220146	81089.8	25388.2	4191.02
0.480122	1000000	767161	406968	220414	81265.3	25470.1	4207.9
0.480678	1000000	767292	407240	220682	81440.8	25552	4224.82
0.481233	1000000	767423	407511	220950	81616.3	25634.1	4241.76
0.481789	1000000	767553	407783	221218	81791.9	25716.2	4258.73
0.482345	1000000	767683	408053	221485	81967.4	25798.4	4275.72
0.4829	1000000	767813	408324	221753	82142.9	25880.6	4292.74
0.483456	1000000	767943	408594	222020	82318.4	25963	4309.79
0.484011	1000000	768072	408864	222286	82494	26045.4	4326.86
0.484567	1000000	768202	409133	222553	82669.5	26127.9	4343.96
0.485122	1000000	768331	409402	222819	82845	26210.4	4361.09
0.485678	1000000	768459	409671	223085	83020.5	26293.1	4378.24
0.486233	1000000	768588	409939	223351	83196	26375.8	4395.42
0.486789	1000000	768716	410207	223616	83371.5	26458.6	4412.62
0.487345	1000000	768845	410475	223882	83547	26541.4	4429.85
0.4879	1000000	768973	410742	224147	83722.5	26624.4	4447.1
0.488456	1000000	769100	411009	224412	83898	26707.4	4464.38
0.489011	1000000	769228	411275	224676	84073.5	26790.4	4481.69
0.489567	1000000	769355	411542	224941	84249	26873.6	4499.02
0.490122	1000000	769482	411807	225205	84424.5	26956.8	4516.38
0.490678	1000000	769609	412073	225469	84600	27040.1	4533.76
0.491233	1000000	769736	412338	225733	84775.4	27123.4	4551.17
0.491789	1000000	769863	412603	225996	84950.9	27206.9	4568.6
0.492345	1000000	769989	412867	226260	85126.3	27290.4	4586.06
0.4929	1000000	770115	413132	226523	85301.8	27373.9	4603.55
0.493456	1000000	770241	413395	226786	85477.2	27457.6	4621.05
0.494011	1000000	770367	413659	227048	85652.7	27541.3	4638.59
0.494567	1000000	770492	413922	227311	85828.1	27625.1	4656.14
0.495122	1000000	770617	414185	227573	86003.5	27708.9	4673.73
0.495678	1000000	770742	414447	227835	86178.9	27792.8	4691.33
0.496234	1000000	770867	414709	228096	86354.3	27876.8	4708.96
0.496789	1000000	770992	414971	228358	86529.7	27960.8	4726.62
0.497345	1000000	771116	415232	228619	86705	28044.9	4744.3
0.4979	1000000	771241	415493	228880	86880.4	28129.1	4762.01
0.498456	1000000	771365	415754	229141	87055.8	28213.4	4779.73
0.499011	1000000	771489	416015	229402	87231.1	28297.7	4797.49
0.499567	1000000	771612	416275	229662	87406.4	28382.1	4815.26
0.500122	1000000	771736	416534	229922	87581.7	28466.5	4833.07
0.500678	1000000	771859	416794	230182	87757.1	28551	4850.89
0.501234	1000000	771982	417053	230442	87932.3	28635.6	4868.74
0.501789	1000000	772105	417311	230701	88107.6	28720.2	4886.61
0.502345	1000000	772228	417570	230960	88282.9	28804.9	4904.51
0.5029	1000000	772350	417828	231219	88458.1	28889.7	4922.43
0.503456	1000000	772472	418086	231478	88633.4	28974.5	4940.37
0.504011	1000000	772594	418343	231737	88808.6	29059.4	4958.34
0.504567	1000000	772716	418600	231995	88983.8	29144.4	4976.33
0.505122	1000000	772838	418857	232253	89159	29229.4	4994.34
0.505678	1000000	772959	419113	232511	89334.2	29314.4	5012.38
0.506234	1000000	773081	419369	232769	89509.3	29399.6	5030.44
0.506789	1000000	773202	419625	233026	89684.5	29484.8	5048.52
0.507345	1000000	773323	419880	233283	89859.6	29570.1	5066.62
0.5079	1000000	773443	420136	233540	90034.7	29655.4	5084.75
0.508456	1000000	773564	420390	233797	90209.8	29740.8	5102.9
0.509011	1000000	773684	420645	234054	90384.9	29826.2	5121.08
0.509567	1000000	773804	420899	234310	90560	29911.7	5139.27
0.510122	1000000	773924	421153	234566	90735	29997.3	5157.49
0.510678	1000000	774044	421406	234822	90910	30082.9	5175.73
0.511234	1000000	774164	421659	235078	91085.1	30168.6	5194
0.511789	1000000	774283	421912	235333	91260	30254.3	5212.28
0.512345	1000000	774402	422165	235588	91435	30340.1	5230.59
0.5129	1000000	774521	422417	235843	91610	30426	5248.92
0.513456	1000000	774640	422669	236098	91784.9	30511.9	5267.27
0.514011	1000000	774759	422920	236353	91959.8	30597.9	5285.65
0.514567	1000000	774877	423172	236607	92134.7	30683.9	5304.04
0.515122	1000000	774995	423422	236861	92309.6	30770	5322.46
0.515678	1000000	775114	423673	237115	92484.4	30856.1	5340.9
0.516234	1000000	775231	423923	237369	92659.2	30942.3	5359.36
0.516789	1000000	775349	424173	237622	92834	31028.6	5377.84
0.517345	1000000	775467	424423	237876	93008.8	31114.9	5396.35
0.5179	1000000	775584	424672	238129	93183.6	31201.3	5414.87
0.518456	1000000	775701	424921	238382	93358.3	31287.7	5433.42
0.519011	1000000	775818	425170	238634	93533	31374.2	5451.99
0.519567	1000000	775935	425419	238887	93707.7	31460.7	5470.58
0.520122	1000000	776051	425667	239139	93882.4	31547.3	5489.19
0.520678	1000000	776168	425914	239391	94057	31634	5507.82
0.521234	1000000	776284	426162	239642	94231.7	31720.7	5526.47
0.521789	1000000	776400	426409	239894	94406.2	31807.4	5545.15
0.522345	1000000	776516	426656	240145	94580.8	31894.2	5563.84
0.5229	1000000	776632	426902	240396	94755.4	31981.1	5582.56
0.523456	1000000	776747	427149	240647	94929.9	32068	5601.29
0.524011	1000000	776863	427395	240898	95104.4	32154.9	5620.05
0.524567	1000000	776978	427640	241148	95278.9	32241.9	5638.82
0.525122	1000000	777093	427886	241399	95453.3	32329	5657.62
0.525678	1000000	777208	428131	241649	95627.7	32416.1	5676.44
0.526234	1000000	777322	428375	241898	95802.1	32503.3	5695.28
0.526789	1000000	777437	428620	242148	95976.5	32590.5	5714.13
0.527345	1000000	777551	428864	242397	96150.8	32677.8	5733.01
0.5279	1000000	777665	429108	242646	96325.1	32765.1	5751.91
0.528456	1000000	777779	429351	242895	96499.4	32852.4	5770.83
0.529011	1000000	777893	429594	243144	96673.7	32939.9	5789.77
0.529567	1000000	778007	429837	243393	96847.9	33027.3	5808.72
0.530122	1000000	778120	430080	243641	97022.1	33114.8	5827.7
0.530678	1000000	778233	430322	243889	97196.3	33202.4	5846.7
0.531234	1000000	778346	430564	244137	97370.4	33290	5865.71
0.531789	1000000	778459	430806	244384	97544.5	33377.7	5884.75
0.532345	1000000	778572	431047	244632	97718.6	33465.4	5903.8
0.5329	1000000	778684	431288	244879	97892.6	33553.1	5922.88
0.533456	1000000	778797	431529	245126	98066.7	33640.9	5941.97
0.534011	1000000	778909	431770	245373	98240.6	33728.8	5961.08
0.534567	1000000	779021	432010	245620	98414.6	33816.7	5980.22
0.535122	1000000	779133	432250	245866	98588.5	33904.6	5999.37
0.535678	1000000	779245	432490	246112	98762.4	33992.6	6018.54
0.536234	1000000	779356	432729	246358	98936.3	34080.6	6037.72
0.536789	1000000	779468	432968	246604	99110.1	34168.7	6056.93
0.537345	1000000	779579	433207	246849	99283.9	34256.8	6076.16
0.5379	1000000	779690	433445	247095	99457.7	34345	6095.4
0.538456	1000000	779801	433683	247340	99631.5	34433.2	6114.67
0.539011	1000000	779911	433921	247585	99805.2	34521.5	6133.95
0.539567	1000000	780022	434159	247829	99978.8	34609.8	6153.25
0.540122	1000000	780132	434396	248074	100152	34698.1	6172.56
0.540678	1000000	780243	434633	248318	100326	34786.5	6191.9
0.541234	1000000	780353	434870	248562	100500	34875	6211.26
0.541789	1000000	780463	435107	248806	100673	34963.4	6230.63
0.542345	1000000	780572	435343	249050	100847	35051.9	6250.02
0.5429	1000000	780682	435579	249293	101020	35140.5	6269.43
0.543456	1000000	780791	435814	249536	101194	35229.1	6288.85
0.544011	1000000	780900	436050	249779	101367	35317.8	6308.3
0.544567	1000000	781009	436285	250022	101540	35406.4	6327.76
0.545122	1000000	781118	436519	250265	101714	35495.2	6347.24
0.545678	1000000	781227	436754	250507	101887	35583.9	6366.74
0.546234	1000000	781336	436988	250749	102060	35672.8	6386.25
0.546789	1000000	781444	437222	250991	102233	35761.6	6405.78
0.547345	1000000	781552	437455	251233	102407	35850.5	6425.33
0.5479	1000000	781661	437689	251475	102580	35939.4	6444.9
0.548456	1000000	781768	437922	251716	102753	36028.4	6464.48
0.549011	1000000	781876	438155	251957	102926	36117.4	6484.08
0.549567	1000000	781984	438387	252198	103099	36206.5	6503.7
0.550122	1000000	782091	438619	252439	103272	36295.6	6523.33
0.550678	1000000	782199	438851	252679	103445	36384.7	6542.99
0.551234	1000000	782306	439083	252920	103618	36473.8	6562.65
0.551789	1000000	782413	439314	253160	103791	36563.1	6582.34
0.552345	1000000	782520	439546	253400	103964	36652.3	6602.04
0.5529	1000000	782626	439776	253639	104136	36741.6	6621.76
0.553456	1000000	782733	440007	253879	104309	36830.9	6641.49
0.554011	1000000	782839	440237	254118	104482	36920.2	6661.24
0.554567	1000000	782945	440467	254357	104655	37009.6	6681.01
0.555122	1000000	783052	440697	254596	104827	37099.1	6700.8
0.555678	1000000	783157	440926	254835	105000	37188.5	6720.6
0.556234	1000000	783263	441156	255073	105173	37278	6740.41
0.556789	1000000	783369	441384	255312	105345	37367.6	6760.24
0.557345	1000000	783474	441613	255550	105518	37457.1	6780.09
0.5579	1000000	783580	441841	255788	105690	37546.7	6799.96
0.558456	1000000	783685	442070	256025	105862	37636.4	6819.84
0.559011	1000000	783790	442297	256263	106035	37726.1	6839.73
0.559567	1000000	783895	442525	256500	106207	37815.8	6859.64
0.560122	1000000	783999	442752	256737	106379	37905.5	6879.57
0.560678	1000000	784104	442979	256974	106552	37995.3	6899.51
0.561234	1000000	784208	443206	257211	106724	38085.1	6919.47
0.561789	1000000	784312	443432	257447	106896	38175	6939.44
0.562345	1000000	784416	443659	257683	107068	38264.8	6959.43
0.5629	1000000	784520	443885	257919	107240	38354.7	6979.43
0.563456	1000000	784624	444110	258155	107412	38444.7	6999.45
0.564011	1000000	784728	444336	258391	107584	38534.7	7019.49
0.564567	1000000	784831	444561	258626	107756	38624.7	7039.54
0.565122	1000000	784935	444786	258862	107928	38714.7	7059.6
0.565678	1000000	785038	445010	259097	108100	38804.8	7079.68
0.566234	1000000	785141	445235	259331	108272	38894.9	7099.77
0.566789	1000000	785244	445459	259566	108444	38985	7119.88
0.567345	1000000	785347	445683	259801	108615	39075.2	7140
0.5679	1000000	785449	445906	260035	108787	39165.4	7160.14
0.568456	1000000	785552	446129	260269	108959	39255.6	7180.29
0.569011	1000000	785654	446352	260503	109130	39345.9	7200.46
0.569567	1000000	785756	446575	260736	109302	39436.2	7220.64
0.570122	1000000	785858	446798	260970	109473	39526.5	7240.84
0.570678	1000000	785960	447020	261203	109645	39616.8	7261.05
0.571234	1000000	786062	447242	261436	109816	39707.2	7281.27
0.571789	1000000	786163	447464	261669	109987	39797.6	7301.51
0.572345	1000000	786265	447685	261902	110159	39888.1	7321.76
0.5729	1000000	786366	447906	262134	110330	39978.5	7342.02
0.573456	1000000	786467	448127	262366	110501	40069	7362.3
0.574011	1000000	786568	448348	262598	110672	40159.5	7382.6
0.574567	1000000	786669	448568	262830	110844	40250.1	7402.9
0.575122	1000000	786770	448789	263062	111015	40340.7	7423.22
0.575678	1000000	786870	449009	263293	111186	40431.3	7443.56
0.576234	1000000	786971	449228	263525	111357	40521.9	7463.91
0.576789	1000000	787071	449448	263756	111528	40612.5	7484.27
0.577345	1000000	787171	449667	263986	111699	40703.2	7504.64
0.5779	1000000	787271	449886	264217	111869	40793.9	7525.03
0.578456	1000000	787371	450104	264448	112040	40884.7	7545.43
0.579011	1000000	787471	450323	264678	112211	40975.4	7565.85
0.579567	1000000	787571	450541	264908	112382	41066.2	7586.28
0.580122	1000000	787670	450759	265138	112552	41157	7606.72
0.580678	1000000	787770	450976	265368	112723	41247.9	7627.17
0.581234	1000000	787869	451194	265597	112893	41338.7	7647.64
0.581789	1000000	787968	451411	265826	113064	41429.6	7668.12
0.582345	1000000	788067	451628	266056	113234	41520.5	7688.61
0.5829	1000000	788165	451845	266285	113405	41611.4	7709.11
0.583456	1000000	788264	452061	266513	113575	41702.4	7729.63
0.584011	1000000	788363	452277	266742	113746	41793.4	7750.16
0.584567	1000000	788461	452493	266970	113916	41884.4	7770.7
0.585122	1000000	788559	452709	267198	114086	41975.4	7791.26
0.585678	1000000	788657	452924	267426	114256	42066.5	7811.82
0.586234	1000000	788755	453139	267654	114426	42157.5	7832.4
0.586789	1000000	788853	453354	267882	114596	42248.6	7853
0.587345	1000000	788951	453569	268109	114766	42339.8	7873.6
0.5879	1000000	789048	453783	268336	114936	42430.9	7894.22
0.588456	1000000	789146	453997	268563	115106	42522.1	7914.84
0.589011	1000000	789243	454211	268790	115276	42613.3	7935.48
0.589567	1000000	789340	454425	269017	115446	42704.5	7956.14
0.590122	1000000	789437	454638	269243	115616	42795.7	7976.8
0.590678	1000000	789534	454851	269469	115785	42886.9	7997.48
0.591234	1000000	789631	455064	269695	115955	42978.2	8018.16
0.591789	1000000	789728	455277	269921	116125	43069.5	8038.86
0.592345	1000000	789824	455490	270147	116294	43160.8	8059.57
0.5929	1000000	789921	455702	270372	116464	43252.1	8080.29
0.593456	1000000	790017	455914	270597	116633	43343.5	8101.03
0.594011	1000000	790113	456125	270823	116802	43434.9	8121.77
0.594567	1000000	790209	456337	271047	116972	43526.3	8142.53
0.595122	1000000	790305	456548	271272	117141	43617.7	8163.3
0.595678	1000000	790400	456759	271497	117310	43709.1	8184.07
0.596234	1000000	790496	456970	271721	117479	43800.5	8204.86
0.596789	1000000	790591	457180	271945	117649	43892	8225.66
0.597345	1000000	790687	457391	272169	117818	43983.5	8246.47
0.5979	1000000	790782	457601	272393	117987	44075	8267.3
0.598456	1000000	790877	457811	272616	118156	44166.5	8288.13
0.599011	1000000	790972	458020	272840	118324	44258	8308.97
0.599567	1000000	791067	458230	273063	118493	44349.6	8329.83
0.600122	1000000	791161	458439	273286	118662	44441.2	8350.69
0.600678	1000000	791256	458648	273509	118831	44532.8	8371.57
0.601234	1000000	791350	458856	273731	118999	44624.4	8392.46
0.601789	1000000	791445	459065	273954	119168	44716	8413.35
0.602345	1000000	791539	459273	274176	119337	44807.6	8434.26
0.6029	1000000	791633	459481	274398	119505	44899.3	8455.18
0.603456	1000000	791727	459688	274620	119674	44990.9	8476.11
0.604011	1000000	791821	459896	274842	119842	45082.6	8497.04
0.604567	1000000	791914	460103	275063	120010	45174.3	8517.99
0.605122	1000000	792008	460310	275285	120179	45266	8538.95
0.605678	1000000	792101	460517	275506	120347	45357.8	8559.92
0.606234	1000000	792195	460723	275727	120515	45449.5	8580.89
0.606789	1000000	792288	460930	275947	120683	45541.3	8601.88
0.607345	1000000	792381	461136	276168	120851	45633.1	8622.88
0.6079	1000000	792474	461342	276388	121019	45724.9	8643.89
0.608456	1000000	792567	461547	276609	121187	45816.7	8664.9
0.609011	1000000	792659	461753	276829	121355	45908.5	8685.93
0.609567	1000000	792752	461958	277048	121523	46000.3	8706.97
0.610122	1000000	792844	462163	277268	121691	46092.2	8728.01
0.610678	1000000	792937	462367	277488	121858	46184	8749.07
0.611234	1000000	793029	462572	277707	122026	46275.9	8770.13
0.611789	1000000	793121	462776	277926	122194	46367.8	8791.21
0.612345	1000000	793213	462980	278145	122361	46459.7	8812.29
0.6129	1000000	793305	463184	278364	122529	46551.6	8833.38
0.613456	1000000	793396	463387	278582	122696	46643.5	8854.48
0.614011	1000000	793488	463591	278801	122864	46735.4	8875.59
0.614567	1000000	793579	463794	279019	123031	46827.4	8896.71
0.615122	1000000	793671	463997	279237	123198	46919.3	8917.84
0.615678	1000000	793762	464199	279455	123365	47011.3	8938.98
0.616234	1000000	793853	464402	279672	123532	47103.3	8960.12
0.616789	1000000	793944	464604	279890	123700	47195.3	8981.28
0.617345	1000000	794035	464806	280107	123867	47287.3	9002.44
0.6179	1000000	794126	465008	280324	124034	47379.3	9023.61
0.618456	1000000	794216	465209	280541	124200	47471.3	9044.8
0.619011	1000000	794307	465411	280758	124367	47563.4	9065.98
0.619567	1000000	794397	465612	280974	124534	47655.4	9087.18
0.620122	1000000	794487	465813	281191	124701	47747.5	9108.39
0.620678	1000000	794578	466013	281407	124867	47839.5	9129.6
0.621234	1000000	794668	466214	281623	125034	47931.6	9150.82
0.621789	1000000	794757	466414	281839	125201	48023.7	9172.06
0.622345	1000000	794847	466614	282054	125367	48115.8	9193.29
0.6229	1000000	794937	466814	282270	125533	48207.9	9214.54
0.623456	1000000	795027	467013	282485	125700	48300	9235.8
0.624011	1000000	795116	467213	282700	125866	48392.1	9257.06
0.624567	1000000	795205	467412	282915	126032	48484.2	9278.33
0.625122	1000000	795295	467611	283130	126199	48576.3	9299.61
0.625678	1000000	795384	467809	283344	126365	48668.5	9320.9
0.626234	1000000	795473	468008	283559	126531	48760.6	9342.19
0.626789	1000000	795561	468206	283773	126697	48852.8	9363.49
0.627345	1000000	795650	468404	283987	126863	48945	9384.8
0.6279	1000000	795739	468602	284201	127029	49037.1	9406.12
0.628456	1000000	795827	468799	284414	127194	49129.3	9427.44
0.629011	1000000	795916	468997	284628	127360	49221.5	9448.78
0.629567	1000000	796004	469194	284841	127526	49313.7	9470.11
0.630122	1000000	796092	469391	285054	127691	49405.9	9491.46
0.630678	1000000	796180	469588	285267	127857	49498.1	9512.82
0.631234	1000000	796268	469784	285480	128022	49590.3	9534.18
0.631789	1000000	796356	469981	285693	128188	49682.5	9555.55
0.632345	1000000	796444	470177	285905	128353	49774.7	9576.92
0.6329	1000000	796532	470373	286117	128519	49867	9598.3
0.633456	1000000	796619	470568	286329	128684	49959.2	9619.69
0.634011	1000000	796706	470764	286541	128849	50051.4	9641.09
0.634567	1000000	796794	470959	286753	129014	50143.7	9662.49
0.635122	1000000	796881	471154	286965	129179	50235.9	9683.9
0.635678	1000000	796968	471349	287176	129344	50328.2	9705.32
0.636234	1000000	797055	471543	287387	129509	50420.4	9726.74
0.636789	1000000	797142	471738	287598	129674	50512.7	9748.17
0.637345	1000000	797229	471932	287809	129839	50605	9769.61
0.6379	1000000	797315	472126	288020	130004	50697.2	9791.05
0.638456	1000000	797402	472320	288230	130168	50789.5	9812.5
0.639011	1000000	797488	472513	288440	130333	50881.8	9833.96
0.639567	1000000	797574	472707	288651	130497	50974.1	9855.42
0.640122	1000000	797661	472900	288861	130662	51066.3	9876.89
0.640678	1000000	797747	473093	289070	130826	51158.6	9898.37
0.641234	1000000	797833	473285	289280	130991	51250.9	9919.85
0.641789	1000000	797918	473478	289489	131155	51343.2	9941.34
0.642345	1000000	798004	473670	289699	131319	51435.5	9962.83
0.6429	1000000	798090	473862	289908	131483	51527.8	9984.33
0.643456	1000000	798175	474054	290117	131647	51620.1	10005.8
0.644011	1000000	798261	474246	290325	131811	51712.4	10027.3
0.644567	1000000	798346	474438	290534	131975	51804.7	10048.9
0.645122	1000000	798431	474629	290742	132139	51897	10070.4
0.645678	1000000	798516	474820	290951	132303	51989.3	10091.9
0.646234	1000000	798601	475011	291159	132467	52081.6	10113.4
0.646789	1000000	798686	475201	291367	132631	52173.9	10135
0.647345	1000000	798771	475392	291574	132794	52266.2	10156.5
0.6479	1000000	798856	475582	291782	132958	52358.5	10178.1
0.648456	1000000	798940	475772	291989	133121	52450.8	10199.6
0.649011	1000000	799025	475962	292196	133285	52543.1	10221.2
0.649567	1000000	799109	476152	292404	133448	52635.4	10242.8
0.650122	1000000	799193	476341	292610	133612	52727.8	10264.3
0.650678	1000000	799278	476530	292817	133775	52820.1	10285.9
0.651234	1000000	799362	476720	293024	133938	52912.4	10307.5
0.651789	1000000	799446	476908	293230	134101	53004.7	10329.1
0.652345	1000000	799529	477097	293436	134264	53097	10350.7
0.6529	1000000	799613	477285	293642	134427	53189.3	10372.3
0.653456	1000000	799697	477474	293848	134590	53281.6	10393.9
0.654011	1000000	799780	477662	294054	134753	53373.9	10415.5
0.654567	1000000	799864	477850	294259	134916	53466.2	10437.1
0.655122	1000000	799947	478037	294464	135078	53558.5	10458.7
0.655678	1000000	800030	478225	294670	135241	53650.8	10480.4
0.656234	1000000	800113	478412	294875	135404	53743.1	10502
0.656789	1000000	800196	478599	295079	135566	53835.4	10523.6
0.657345	1000000	800279	478786	295284	135729	53927.7	10545.3
0.6579	1000000	800362	478973	295489	135891	54020	10566.9
0.658456	1000000	800445	479159	295693	136053	54112.3	10588.5
0.659011	1000000	800527	479345	295897	136216	54204.6	10610.2
0.659567	1000000	800610	479531	296101	136378	54296.9	10631.9
0.660122	1000000	800692	479717	296305	136540	54389.2	10653.5
0.660678	1000000	800775	479903	296508	136702	54481.4	10675.2
0.661234	1000000	800857	480088	296712	136864	54573.7	10696.8
0.661789	1000000	800939	480274	296915	137026	54666	10718.5
0.662345	1000000	801021	480459	297118	137188	54758.3	10740.2
0.6629	1000000	801103	480644	297321	137349	54850.5	10761.9
0.663456	1000000	801185	480828	297524	137511	54942.8	10783.6
0.664011	1000000	801266	481013	297727	137673	55035	10805.3
0.664567	1000000	801348	481197	297929	137834	55127.3	10826.9
0.665122	1000000	801429	481381	298132	137996	55219.5	10848.6
0.665678	1000000	801511	481565	298334	138157	55311.8	10870.3
0.666234	1000000	801592	481749	298536	138319	55404	10892.1
0.666789	1000000	801673	481933	298738	138480	55496.3	10913.8
0.667345	1000000	801754	482116	298939	138641	55588.5	10935.5
0.6679	1000000	801835	482299	299141	138802	55680.7	10957.2
0.668456	1000000	801916	482482	299342	138963	55772.9	10978.9
0.669011	1000000	801997	482665	299543	139124	55865.2	11000.6
0.669567	1000000	802078	482848	299744	139285	55957.4	11022.4
0.670122	1000000	802158	483030	299945	139446	56049.6	11044.1
0.670678	1000000	802239	483212	300146	139607	56141.8	11065.8
0.671234	1000000	802319	483394	300346	139768	56234	11087.6
0.671789	1000000	802400	483576	300546	139928	56326.1	11109.3
0.672345	1000000	802480	483758	300747	140089	56418.3	11131
0.6729	1000000	802560	483939	300947	140250	56510.5	11152.8
0.673456	1000000	802640	484120	301146	140410	56602.7	11174.5
0.674011	1000000	802720	484301	301346	140570	56694.8	11196.3
0.674567	1000000	802800	484482	301546	140731	56787	11218.1
0.675122	1000000	802880	484663	301745	140891	56879.1	11239.8
0.675678	1000000	802959	484844	301944	141051	56971.3	11261.6
0.676234	1000000	803039	485024	302143	141211	57063.4	11283.3
0.676789	1000000	803118	485204	302342	141371	57155.5	11305.1
0.677345	1000000	803198	485384	302541	141531	57247.6	11326.9
0.6779	1000000	803277	485564	302739	141691	57339.8	11348.7
0.678456	1000000	803356	485743	302937	141851	57431.9	11370.4
0.679011	1000000	803435	485923	303136	142011	57524	11392.2
0.679567	1000000	803514	486102	303334	142170	57616	11414
0.680122	1000000	803593	486281	303532	142330	57708.1	11435.8
0.680678	1000000	803672	486460	303729	142490	57800.2	11457.6
0.681234	1000000	803750	486639	303927	142649	57892.2	11479.4
0.681789	1000000	803829	486817	304124	142809	57984.3	11501.2
0.682345	1000000	803908	486995	304321	142968	58076.3	11523
0.6829	1000000	803986	487174	304519	143127	58168.4	11544.7
0.683456	1000000	804064	487352	304715	143286	58260.4	11566.6
0.684011	1000000	804143	487529	304912	143445	58352.4	11588.4
0.684567	1000000	804221	487707	305109	143604	58444.4	11610.2
0.685122	1000000	804299	487884	305305	143763	58536.4	11632
0.685678	1000000	804377	488061	305502	143922	58628.4	11653.8
0.686234	1000000	804454	488238	305698	144081	58720.4	11675.6
0.686789	1000000	804532	488415	305894	144240	58812.4	11697.4
0.687345	1000000	804610	488592	306089	144399	58904.3	11719.2
0.6879	1000000	804688	488768	306285	144557	58996.3	11741
0.688456	1000000	804765	488945	306480	144716	59088.2	11762.9
0.689011	1000000	804842	489121	306676	144874	59180.1	11784.7
0.689567	1000000	804920	489297	306871	145033	59272	11806.5
0.690122	1000000	804997	489473	307066	145191	59363.9	11828.3
0.690678	1000000	805074	489648	307261	145349	59455.8	11850.1
0.691234	1000000	805151	489824	307455	145508	59547.7	11872
0.691789	1000000	805228	489999	307650	145666	59639.6	11893.8
0.692345	1000000	805305	490174	307844	145824	59731.5	11915.6
0.6929	1000000	805382	490349	308038	145982	59823.3	11937.5
0.693456	1000000	805458	490523	308233	146140	59915.1	11959.3
0.694011	1000000	805535	490698	308426	146297	60007	11981.1
0.694567	1000000	805611	490872	308620	146455	60098.8	12003
0.695122	1000000	805688	491047	308814	146613	60190.6	12024.8
0.695678	1000000	805764	491221	309007	146770	60282.4	12046.7
0.696234	1000000	805840	491394	309200	146928	60374.1	12068.5
0.696789	1000000	805917	491568	309393	147086	60465.9	12090.4
0.697345	1000000	805993	491741	309586	147243	60557.7	12112.2
0.6979	1000000	806069	491915	309779	147400	60649.4	12134
0.698456	1000000	806144	492088	309972	147557	60741.1	12155.9
0.699011	1000000	806220	492261	310164	147715	60832.9	12177.7
0.699567	1000000	806296	492434	310357	147872	60924.6	12199.6
0.700122	1000000	806371	492606	310549	148029	61016.2	12221.4
0.700678	1000000	806447	492779	310741	148186	61107.9	12243.3
0.701234	1000000	806522	492951	310933	148343	61199.6	12265.1
0.701789	1000000	806598	493123	311124	148499	61291.2	12287
0.702345	1000000	806673	493295	311316	148656	61382.9	12308.9
0.7029	1000000	806748	493466	311507	148813	61474.5	12330.7
0.703456	1000000	806823	493638	311698	148969	61566.1	12352.6
0.704011	1000000	806898	493809	311890	149126	61657.7	12374.4
0.704567	1000000	806973	493981	312080	149282	61749.3	12396.3
0.705122	1000000	807048	494152	312271	149439	61840.8	12418.1
0.705678	1000000	807123	494322	312462	149595	61932.4	12440
0.706234	1000000	807197	494493	312652	149751	62023.9	12461.9
0.706789	1000000	807272	494664	312843	149907	62115.4	12483.7
0.707345	1000000	807346	494834	313033	150064	62207	12505.6
0.7079	1000000	807421	495004	313223	150220	62298.4	12527.4
0.708456	1000000	807495	495174	313413	150376	62389.9	12549.3
0.709011	1000000	807569	495344	313602	150531	62481.4	12571.2
0.709567	1000000	807644	495514	313792	150687	62572.8	12593
0.710122	1000000	807718	495683	313981	150843	62664.3	12614.9
0.710678	1000000	807792	495852	314170	150999	62755.7	12636.8
0.711234	1000000	807865	496022	314359	151154	62847.1	12658.6
0.711789	1000000	807939	496191	314548	151310	62938.5	12680.5
0.712345	1000000	808013	496359	314737	151465	63029.8	12702.3
0.7129	1000000	808087	496528	314926	151620	63121.2	12724.2
0.713456	1000000	808160	496697	315114	151776	63212.5	12746.1
0.714011	1000000	808234	496865	315303	151931	63303.9	12767.9
0.714567	1000000	808307	497033	315491	152086	63395.2	12789.8
0.715122	1000000	808380	497201	315679	152241	63486.4	12811.7
0.715678	1000000	808453	497369	315867	152396	63577.7	12833.5
0.716234	1000000	808527	497537	316054	152551	63669	12855.4
0.716789	1000000	808600	497704	316242	152706	63760.2	12877.3
0.717345	1000000	808673	497871	316429	152860	63851.4	12899.1
0.7179	1000000	808746	498038	316616	153015	63942.6	12921
0.718456	1000000	808818	498205	316804	153170	64033.8	12942.8
0.719011	1000000	808891	498372	316991	153324	64125	12964.7
0.719567	1000000	808964	498539	317177	153479	64216.2	12986.6
0.720122	1000000	809036	498705	317364	153633	64307.3	13008.4
0.720678	1000000	809109	498872	317550	153787	64398.4	13030.3
0.721234	1000000	809181	499038	317737	153941	64489.5	13052.2
0.721789	1000000	809253	499204	317923	154096	64580.6	13074
0.722345	1000000	809326	499370	318109	154250	64671.7	13095.9
0.7229	1000000	809398	499535	318295	154404	64762.7	13117.7
0.723456	1000000	809470	499701	318481	154558	64853.7	13139.6
0.724011	1000000	809542	499866	318666	154711	64944.8	13161.4
0.724567	1000000	809614	500032	318852	154865	65035.8	13183.3
0.725122	1000000	809685	500197	319037	155019	65126.7	13205.2
0.725678	1000000	809757	500361	319222	155173	65217.7	13227
0.726234	1000000	809829	500526	319407	155326	65308.6	13248.9
0.726789	1000000	809900	500691	319592	155480	65399.5	13270.7
0.727345	1000000	809972	500855	319777	155633	65490.4	13292.6
0.7279	1000000	810043	501019	319961	155786	65581.3	13314.4
0.728456	1000000	810115	501183	320146	155940	65672.2	13336.3
0.729011	1000000	810186	501347	320330	156093	65763	13358.1
0.729567	1000000	810257	501511	320514	156246	65853.9	13380
0.730122	1000000	810328	501675	320698	156399	65944.7	13401.8
0.730678	1000000	810399	501838	320882	156552	66035.5	13423.7
0.731234	1000000	810470	502001	321066	156705	66126.2	13445.5
0.731789	1000000	810541	502164	321249	156857	66217	13467.4
0.732345	1000000	810612	502327	321432	157010	66307.7	13489.2
0.7329	1000000	810683	502490	321616	157163	66398.4	13511.1
0.733456	1000000	810753	502653	321799	157315	66489.1	13532.9
0.734011	1000000	810824	502815	321982	157468	66579.8	13554.7
0.734567	1000000	810894	502977	322164	157620	66670.4	13576.6
0.735122	1000000	810965	503140	322347	157773	66761	13598.4
0.735678	1000000	811035	503302	322530	157925	66851.6	13620.3
0.736234	1000000	811105	503463	322712	158077	66942.2	13642.1
0.736789	1000000	811175	503625	322894	158229	67032.8	13663.9
0.737345	1000000	811245	503787	323076	158381	67123.3	13685.8
0.7379	1000000	811315	503948	323258	158533	67213.9	13707.6
0.738456	1000000	811385	504109	323440	158685	67304.4	13729.4
0.739011	1000000	811455	504270	323621	158837	67394.8	13751.2
0.739567	1000000	811525	504431	323803	158988	67485.3	13773.1
0.740122	1000000	811595	504592	323984	159140	67575.7	13794.9
0.740678	1000000	811664	504752	324165	159292	67666.2	13816.7
0.741234	1000000	811734	504913	324347	159443	67756.6	13838.5
0.741789	1000000	811803	505073	324527	159595	67846.9	13860.4
0.742345	1000000	811873	505233	324708	159746	67937.3	13882.2
0.7429	1000000	811942	505393	324889	159897	68027.6	13904
0.743456	1000000	812011	505553	325069	160048	68117.9	13925.8
0.744011	1000000	812080	505713	325250	160200	68208.2	13947.6
0.744567	1000000	812149	505872	325430	160351	68298.5	13969.4
0.745122	1000000	812218	506031	325610	160502	68388.7	13991.2
0.745678	1000000	812287	506191	325790	160652	68479	14013
0.746234	1000000	812356	506350	325969	160803	68569.2	14034.8
0.746789	1000000	812425	506509	326149	160954	68659.3	14056.6
0.747345	1000000	812494	506667	326328	161105	68749.5	14078.4
0.7479	1000000	812562	506826	326508	161255	68839.6	14100.2
0.748456	1000000	812631	506984	326687	161406	68929.7	14122
0.749011	1000000	812699	507143	326866	161556	69019.8	14143.8
0.749567	1000000	812768	507301	327045	161706	69109.9	14165.6
0.750122	1000000	812836	507459	327224	161857	69199.9	14187.4
0.750678	1000000	812904	507616	327402	162007	69290	14209.2
0.751234	1000000	812972	507774	327581	162157	69380	14231
0.751789	1000000	813040	507932	327759	162307	69469.9	14252.8
0.752345	1000000	813109	508089	327937	162457	69559.9	14274.5
0.7529	1000000	813176	508246	328115	162607	69649.8	14296.3
0.753456	1000000	813244	508403	328293	162757	69739.7	14318.1
0.754011	1000000	813312	508560	328471	162906	69829.6	14339.9
0.754567	1000000	813380	508717	328648	163056	69919.4	14361.6
0.755122	1000000	813448	508874	328826	163206	70009.3	14383.4
0.755678	1000000	813515	509030	329003	163355	70099.1	14405.1
0.756234	1000000	813583	509186	329180	163505	70188.9	14426.9
0.756789	1000000	813650	509342	329358	163654	70278.6	14448.7
0.757345	1000000	813717	509499	329534	163803	70368.4	14470.4
0.7579	1000000	813785	509654	329711	163952	70458.1	14492.2
0.758456	1000000	813852	509810	329888	164102	70547.8	14513.9
0.759011	1000000	813919	509966	330064	164251	70637.4	14535.7
0.759567	1000000	813986	510121	330241	164400	70727.1	14557.4
0.760122	1000000	814053	510276	330417	164548	70816.7	14579.2
0.760678	1000000	814120	510431	330593	164697	70906.3	14600.9
0.761234	1000000	814187	510586	330769	164846	70995.9	14622.6
0.761789	1000000	814254	510741	330945	164995	71085.4	14644.4
0.762345	1000000	814321	510896	331120	165143	71174.9	14666.1
0.7629	1000000	814387	511050	331296	165292	71264.4	14687.8
0.763456	1000000	814454	511205	331471	165440	71353.9	14709.6
0.764011	1000000	814520	511359	331646	165588	71443.3	14731.3
0.764567	1000000	814587	511513	331822	165737	71532.7	14753
0.765122	1000000	814653	511667	331997	165885	71622.1	14774.7
0.765678	1000000	814719	511821	332171	166033	71711.5	14796.4
0.766234	1000000	814786	511975	332346	166181	71800.8	14818.1
0.766789	1000000	814852	512128	332521	166329	71890.1	14839.8
0.767345	1000000	814918	512282	332695	166477	71979.4	14861.5
0.7679	1000000	814984	512435	332869	166625	72068.7	14883.2
0.768456	1000000	815050	512588	333043	166772	72157.9	14904.9
0.769011	1000000	815116	512741	333217	166920	72247.1	14926.6
0.769567	1000000	815181	512894	333391	167068	72336.3	14948.3
0.770122	1000000	815247	513046	333565	167215	72425.5	14970
0.770678	1000000	815313	513199	333738	167362	72514.6	14991.7
0.771234	1000000	815378	513351	333912	167510	72603.7	15013.4
0.771789	1000000	815444	513503	334085	167657	72692.8	15035
0.772345	1000000	815509	513655	334258	167804	72781.9	15056.7
0.7729	1000000	815575	513807	334431	167951	72870.9	15078.4
0.773456	1000000	815640	513959	334604	168098	72959.9	15100
0.774011	1000000	815705	514111	334777	168245	73048.9	15121.7
0.774567	1000000	815771	514262	334950	168392	73137.8	15143.4
0.775122	1000000	815836	514414	335122	168539	73226.8	15165
0.775678	1000000	815901	514565	335295	168686	73315.7	15186.7
0.776234	1000000	815966	514716	335467	168832	73404.5	15208.3
0.776789	1000000	816031	514867	335639	168979	73493.4	15230
0.777345	1000000	816095	515018	335811	169125	73582.2	15251.6
0.7779	1000000	816160	515168	335983	169272	73671	15273.2
0.778456	1000000	816225	515319	336154	169418	73759.7	15294.9
0.779011	1000000	816289	515469	336326	169564	73848.5	15316.5
0.779567	1000000	816354	515619	336497	169710	73937.2	15338.1
0.780122	1000000	816418	515769	336669	169857	74025.8	15359.7
0.780678	1000000	816483	515919	336840	170003	74114.5	15381.4
0.781234	1000000	816547	516069	337011	170148	74203.1	15403
0.781789	1000000	816612	516219	337182	170294	74291.7	15424.6
0.782345	1000000	816676	516368	337352	170440	74380.3	15446.2
0.7829	1000000	816740	516518	337523	170586	74468.8	15467.8
0.783456	1000000	816804	516667	337693	170731	74557.3	15489.4
0.784011	1000000	816868	516816	337864	170877	74645.8	15511
0.784567	1000000	816932	516965	338034	171022	74734.3	15532.6
0.785122	1000000	816996	517114	338204	171168	74822.7	15554.1
0.785678	1000000	817060	517263	338374	171313	74911.1	15575.7
0.786234	1000000	817123	517411	338544	171458	74999.5	15597.3
0.786789	1000000	817187	517560	338713	171603	75087.8	15618.9
0.787345	1000000	817251	517708	338883	171748	75176.2	15640.4
0.7879	1000000	817314	517856	339052	171893	75264.4	15662
0.788456	1000000	817378	518004	339221	172038	75352.7	15683.6
0.789011	1000000	817441	518152	339391	172183	75440.9	15705.1
0.789567	1000000	817505	518300	339560	172328	75529.1	15726.7
0.790122	1000000	817568	518447	339728	172473	75617.3	15748.2
0.790678	1000000	817631	518595	339897	172617	75705.5	15769.8
0.791234	1000000	817694	518742	340066	172762	75793.6	15791.3
0.791789	1000000	817757	518889	340234	172906	75881.7	15812.8
0.792345	1000000	817820	519036	340403	173051	75969.7	15834.4
0.7929	1000000	817883	519183	340571	173195	76057.7	15855.9
0.793456	1000000	817946	519330	340739	173339	76145.7	15877.4
0.794011	1000000	818009	519476	340907	173483	76233.7	15898.9
0.794567	1000000	818072	519623	341075	173627	76321.7	15920.4
0.795122	1000000	818134	519769	341242	173771	76409.6	15941.9
0.795678	1000000	818197	519916	341410	173915	76497.5	15963.4
0.796234	1000000	818260	520062	341577	174059	76585.3	15984.9
0.796789	1000000	818322	520208	341745	174203	76673.1	16006.4
0.797345	1000000	818385	520353	341912	174346	76760.9	16027.9
0.7979	1000000	818447	520499	342079	174490	76848.7	16049.4
0.798456	1000000	818509	520645	342246	174633	76936.4	16070.9
0.799011	1000000	818572	520790	342412	174777	77024.1	16092.4
0.799567	1000000	818634	520935	342579	174920	77111.8	16113.8
0.800122	1000000	818696	521081	342746	175063	77199.5	16135.3
0.800678	1000000	818758	521226	342912	175207	77287.1	16156.8
0.801234	1000000	818820	521370	343078	175350	77374.7	16178.2
0.801789	1000000	818882	521515	343244	175493	77462.2	16199.7
0.802345	1000000	818944	521660	343410	175636	77549.7	16221.1
0.8029	1000000	819005	521804	343576	175779	77637.2	16242.5
0.803456	1000000	819067	521949	343742	175921	77724.7	16264
0.804011	1000000	819129	522093	343907	176064	77812.1	16285.4
0.804567	1000000	819190	522237	344073	176207	77899.5	16306.8
0.805122	1000000	819252	522381	344238	176349	77986.9	16328.3
0.805678	1000000	819314	522525	344403	176492	78074.3	16349.7
0.806234	1000000	819375	522669	344569	176634	78161.6	16371.1
0.806789	1000000	819436	522812	344734	176776	78248.8	16392.5
0.807345	1000000	819498	522956	344898	176919	78336.1	16413.9
0.8079	1000000	819559	523099	345063	177061	78423.3	16435.3
0.808456	1000000	819620	523242	345228	177203	78510.5	16456.7
0.809011	1000000	819681	523385	345392	177345	78597.7	16478.1
0.809567	1000000	819742	523528	345556	177487	78684.8	16499.4
0.810122	1000000	819803	523671	345721	177629	78771.9	16520.8
0.810678	1000000	819864	523813	345885	177770	78859	16542.2
0.811234	1000000	819925	523956	346049	177912	78946	16563.5
0.811789	1000000	819986	524098	346212	178054	79033	16584.9
0.812345	1000000	820046	524241	346376	178195	79120	16606.3
0.8129	1000000	820107	524383	346540	178337	79206.9	16627.6
0.813456	1000000	820168	524525	346703	178478	79293.8	16648.9
0.814011	1000000	820228	524667	346866	178619	79380.7	16670.3
0.814567	1000000	820289	524808	347029	178761	79467.5	16691.6
0.815122	1000000	820349	524950	347192	178902	79554.4	16712.9
0.815678	1000000	820410	525091	347355	179043	79641.1	16734.3
0.816234	1000000	820470	525233	347518	179184	79727.9	16755.6
0.816789	1000000	820530	525374	347681	179325	79814.6	16776.9
0.817345	1000000	820590	525515	347843	179466	79901.3	16798.2
0.8179	1000000	820650	525656	348006	179606	79988	16819.5
0.818456	1000000	820711	525797	348168	179747	80074.6	16840.8
0.819011	1000000	820771	525938	348330	179888	80161.2	16862.1
0.819567	1000000	820830	526078	348492	180028	80247.7	16883.4
0.820122	1000000	820890	526219	348654	180168	80334.3	16904.6
0.820678	1000000	820950	526359	348816	180309	80420.8	16925.9
0.821234	1000000	821010	526499	348977	180449	80507.2	16947.2
0.821789	1000000	821070	526639	349139	180589	80593.7	16968.4
0.822345	1000000	821129	526779	349300	180729	80680.1	16989.7
0.8229	1000000	821189	526919	349462	180869	80766.4	17010.9
0.823456	1000000	821248	527059	349623	181009	80852.8	17032.2
0.824011	1000000	821308	527198	349784	181149	80939.1	17053.4
0.824567	1000000	821367	527338	349945	181289	81025.3	17074.7
0.825123	1000000	821427	527477	350105	181429	81111.6	17095.9
0.825678	1000000	821486	527616	350266	181568	81197.8	17117.1
0.826234	1000000	821545	527756	350427	181708	81283.9	17138.3
0.826789	1000000	821604	527894	350587	181847	81370.1	17159.5
0.827345	1000000	821663	528033	350747	181987	81456.2	17180.7
0.8279	1000000	821722	528172	350907	182126	81542.3	17201.9
0.828456	1000000	821781	528311	351067	182265	81628.3	17223.1
0.829011	1000000	821840	528449	351227	182405	81714.3	17244.3
0.829567	1000000	821899	528587	351387	182544	81800.3	17265.5
0.830123	1000000	821958	528726	351547	182683	81886.2	17286.7
0.830678	1000000	822017	528864	351706	182822	81972.1	17307.8
0.831234	1000000	822076	529002	351866	182961	82058	17329
0.831789	1000000	822134	529139	352025	183099	82143.8	17350.1
0.832345	1000000	822193	529277	352184	183238	82229.7	17371.3
0.8329	1000000	822251	529415	352343	183377	82315.4	17392.4
0.833456	1000000	822310	529552	352502	183515	82401.2	17413.6
0.834011	1000000	822368	529690	352661	183654	82486.9	17434.7
0.834567	1000000	822426	529827	352820	183792	82572.6	17455.8
0.835123	1000000	822485	529964	352978	183930	82658.2	17477
0.835678	1000000	822543	530101	353137	184069	82743.8	17498.1
0.836234	1000000	822601	530238	353295	184207	82829.4	17519.2
0.836789	1000000	822659	530374	353453	184345	82914.9	17540.3
0.837345	1000000	822717	530511	353611	184483	83000.4	17561.4
0.8379	1000000	822775	530647	353769	184621	83085.9	17582.5
0.838456	1000000	822833	530784	353927	184759	83171.3	17603.5
0.839011	1000000	822891	530920	354085	184896	83256.7	17624.6
0.839567	1000000	822949	531056	354242	185034	83342.1	17645.7
0.840123	1000000	823007	531192	354400	185172	83427.5	17666.7
0.840678	1000000	823064	531328	354557	185309	83512.8	17687.8
0.841234	1000000	823122	531464	354714	185446	83598	17708.9
0.841789	1000000	823180	531599	354871	185584	83683.3	17729.9
0.842345	1000000	823237	531735	355028	185721	83768.5	17750.9
0.8429	1000000	823295	531870	355185	185858	83853.6	17772
0.843456	1000000	823352	532006	355342	185995	83938.8	17793
0.844011	1000000	823410	532141	355498	186133	84023.9	17814
0.844567	1000000	823467	532276	355655	186269	84108.9	17835
0.845123	1000000	823524	532411	355811	186406	84194	17856
0.845678	1000000	823581	532545	355967	186543	84279	17877
0.846234	1000000	823639	532680	356124	186680	84363.9	17898
0.846789	1000000	823696	532815	356280	186817	84448.9	17919
0.847345	1000000	823753	532949	356435	186953	84533.7	17940
0.8479	1000000	823810	533083	356591	187090	84618.6	17961
0.848456	1000000	823867	533218	356747	187226	84703.4	17981.9
0.849011	1000000	823923	533352	356902	187362	84788.2	18002.9
0.849567	1000000	823980	533486	357058	187499	84873	18023.8
0.850123	1000000	824037	533620	357213	187635	84957.7	18044.8
0.850678	1000000	824094	533753	357368	187771	85042.4	18065.7
0.851234	1000000	824150	533887	357523	187907	85127	18086.7
0.851789	1000000	824207	534020	357678	188043	85211.6	18107.6
0.852345	1000000	824264	534154	357833	188179	85296.2	18128.5
0.8529	1000000	824320	534287	357988	188315	85380.8	18149.4
0.853456	1000000	824376	534420	358142	188450	85465.3	18170.3
0.854011	1000000	824433	534553	358297	188586	85549.8	18191.2
0.854567	1000000	824489	534686	358451	188721	85634.2	18212.1
0.855123	1000000	824545	534819	358605	188857	85718.6	18233
0.855678	1000000	824602	534951	358759	188992	85803	18253.9
0.856234	1000000	824658	535084	358913	189128	85887.3	18274.8
0.856789	1000000	824714	535216	359067	189263	85971.6	18295.6
0.857345	1000000	824770	535349	359221	189398	86055.9	18316.5
0.8579	1000000	824826	535481	359374	189533	86140.1	18337.4
0.858456	1000000	824882	535613	359528	189668	86224.3	18358.2
0.859011	1000000	824938	535745	359681	189803	86308.4	18379
0.859567	1000000	824994	535877	359835	189938	86392.6	18399.9
0.860123	1000000	825049	536008	359988	190073	86476.7	18420.7
0.860678	1000000	825105	536140	360141	190207	86560.7	18441.5
0.861234	1000000	825161	536272	360294	190342	86644.7	18462.3
0.861789	1000000	825216	536403	360446	190476	86728.7	18483.1
0.862345	1000000	825272	536534	360599	190611	86812.6	18503.9
0.8629	1000000	825327	536665	360752	190745	86896.6	18524.7
0.863456	1000000	825383	536796	360904	190880	86980.4	18545.5
0.864011	1000000	825438	536927	361056	191014	87064.3	18566.3
0.864567	1000000	825494	537058	361209	191148	87148.1	18587.1
0.865123	1000000	825549	537189	361361	191282	87231.8	18607.8
0.865678	1000000	825604	537319	361513	191416	87315.6	18628.6
0.866234	1000000	825659	537450	361665	191550	87399.3	18649.3
0.866789	1000000	825714	537580	361816	191684	87482.9	18670.1
0.867345	1000000	825770	537710	361968	191817	87566.5	18690.8
0.8679	1000000	825825	537841	362119	191951	87650.1	18711.5
0.868456	1000000	825880	537971	362271	192085	87733.7	18732.2
0.869011	1000000	825934	538101	362422	192218	87817.2	18753
0.869567	1000000	825989	538230	362573	192352	87900.7	18773.7
0.870123	1000000	826044	538360	362724	192485	87984.1	18794.4
0.870678	1000000	826099	538490	362875	192618	88067.5	18815.1
0.871234	1000000	826154	538619	363026	192752	88150.9	18835.7
0.871789	1000000	826208	538748	363177	192885	88234.2	18856.4
0.872345	1000000	826263	538878	363327	193018	88317.5	18877.1
0.8729	1000000	826317	539007	363478	193151	88400.8	18897.7
0.873456	1000000	826372	539136	363628	193284	88484	18918.4
0.874011	1000000	826426	539264	363778	193416	88567.2	18939.1
0.874567	1000000	826481	539393	363929	193549	88650.3	18959.7
0.875123	1000000	826535	539522	364079	193682	88733.5	18980.3
0.875678	1000000	826589	539650	364229	193814	88816.5	19001
0.876234	1000000	826644	539779	364378	193947	88899.6	19021.6
0.876789	1000000	826698	539907	364528	194079	88982.6	19042.2
0.877345	1000000	826752	540035	364678	194212	89065.5	19062.8
0.8779	1000000	826806	540164	364827	194344	89148.5	19083.4
0.878456	1000000	826860	540292	364976	194476	89231.4	19104
0.879011	1000000	826914	540419	365126	194608	89314.2	19124.6
0.879567	1000000	826968	540547	365275	194740	89397.1	19145.1
0.880123	1000000	827022	540675	365424	194872	89479.8	19165.7
0.880678	1000000	827076	540802	365572	195004	89562.6	19186.3
0.881234	1000000	827130	540930	365721	195136	89645.3	19206.8
0.881789	1000000	827183	541057	365870	195267	89728	19227.4
0.882345	1000000	827237	541184	366018	195399	89810.6	19247.9
0.8829	1000000	827291	541311	366167	195531	89893.2	19268.4
0.883456	1000000	827344	541438	366315	195662	89975.8	19288.9
0.884011	1000000	827398	541565	366463	195794	90058.3	19309.5
0.884567	1000000	827451	541692	366611	195925	90140.8	19330
0.885123	1000000	827505	541819	366759	196056	90223.2	19350.5
0.885678	1000000	827558	541945	366907	196187	90305.7	19371
0.886234	1000000	827611	542072	367055	196318	90388	19391.4
0.886789	1000000	827665	542198	367203	196449	90470.4	19411.9
0.887345	1000000	827718	542324	367350	196580	90552.7	19432.4
0.8879	1000000	827771	542450	367498	196711	90634.9	19452.9
0.888456	1000000	827824	542576	367645	196842	90717.2	19473.3
0.889011	1000000	827877	542702	367792	196973	90799.4	19493.8
0.889567	1000000	827930	542828	367939	197103	90881.5	19514.2
0.890123	1000000	827983	542954	368086	197234	90963.6	19534.6
0.890678	1000000	828036	543079	368233	197364	91045.7	19555
0.891234	1000000	828089	543205	368380	197495	91127.8	19575.5
0.891789	1000000	828142	543330	368526	197625	91209.8	19595.9
0.892345	1000000	828195	543455	368673	197755	91291.7	19616.3
0.8929	1000000	828247	543581	368819	197885	91373.7	19636.7
0.893456	1000000	828300	543706	368965	198015	91455.5	19657.1
0.894011	1000000	828353	543831	369112	198145	91537.4	19677.4
0.894567	1000000	828405	543955	369258	198275	91619.2	19697.8
0.895123	1000000	828458	544080	369404	198405	91701	19718.2
0.895678	1000000	828510	544205	369550	198535	91782.7	19738.5
0.896234	1000000	828563	544329	369695	198665	91864.4	19758.9
0.896789	1000000	828615	544454	369841	198794	91946.1	19779.2
0.897345	1000000	828667	544578	369986	198924	92027.7	19799.5
0.8979	1000000	828720	544702	370132	199053	92109.3	19819.9
0.898456	1000000	828772	544826	370277	199183	92190.9	19840.2
0.899011	1000000	828824	544950	370422	199312	92272.4	19860.5
0.899567	1000000	828876	545074	370567	199441	92353.9	19880.8
0.900123	1000000	828928	545198	370712	199570	92435.3	19901.1
0.900678	1000000	828980	545321	370857	199699	92516.7	19921.3
0.901234	1000000	829032	545445	371002	199828	92598.1	19941.6
0.901789	1000000	829084	545568	371147	199957	92679.4	19961.9
0.902345	1000000	829136	545692	371291	200086	92760.7	19982.2
0.9029	1000000	829188	545815	371436	200215	92841.9	20002.4
0.903456	1000000	829240	545938	371580	200344	92923.2	20022.6
0.904011	1000000	829291	546061	371724	200472	93004.3	20042.9
0.904567	1000000	829343	546184	371868	200601	93085.5	20063.1
0.905123	1000000	829395	546307	372012	200729	93166.6	20083.3
0.905678	1000000	829446	546429	372156	200858	93247.6	20103.5
0.906234	1000000	829498	546552	372300	200986	93328.6	20123.7
0.906789	1000000	829549	546675	372443	201114	93409.6	20143.9
0.907345	1000000	829601	546797	372587	201242	93490.6	20164.1
0.9079	1000000	829652	546919	372730	201370	93571.5	20184.3
0.908456	1000000	829704	547041	372874	201498	93652.4	20204.5
0.909011	1000000	829755	547164	373017	201626	93733.2	20224.6
0.909567	1000000	829806	547285	373160	201754	93814	20244.8
0.910123	1000000	829858	547407	373303	201882	93894.7	20264.9
0.910678	1000000	829909	547529	373446	202009	93975.4	20285.1
0.911234	1000000	829960	547651	373589	202137	94056.1	20305.2
0.911789	1000000	830011	547772	373731	202265	94136.8	20325.3
0.912345	1000000	830062	547894	373874	202392	94217.4	20345.5
0.9129	1000000	830113	548015	374016	202519	94297.9	20365.6
0.913456	1000000	830164	548136	374159	202647	94378.4	20385.7
0.914011	1000000	830215	548258	374301	202774	94458.9	20405.8
0.914567	1000000	830266	548379	374443	202901	94539.4	20425.8
0.915123	1000000	830316	548500	374585	203028	94619.8	20445.9
0.915678	1000000	830367	548620	374727	203155	94700.2	20466
0.916234	1000000	830418	548741	374869	203282	94780.5	20486
0.916789	1000000	830469	548862	375011	203409	94860.8	20506.1
0.917345	1000000	830519	548982	375152	203536	94941	20526.1
0.9179	1000000	830570	549103	375294	203662	95021.2	20546.2
0.918456	1000000	830620	549223	375435	203789	95101.4	20566.2
0.919011	1000000	830671	549343	375576	203915	95181.6	20586.2
0.919567	1000000	830721	549463	375718	204042	95261.7	20606.2
0.920123	1000000	830772	549583	375859	204168	95341.7	20626.2
0.920678	1000000	830822	549703	376000	204294	95421.7	20646.2
0.921234	1000000	830872	549823	376140	204421	95501.7	20666.2
0.921789	1000000	830922	549943	376281	204547	95581.7	20686.2
0.922345	1000000	830973	550063	376422	204673	95661.6	20706.1
0.9229	1000000	831023	550182	376562	204799	95741.4	20726.1
0.923456	1000000	831073	550302	376703	204925	95821.3	20746
0.924011	1000000	831123	550421	376843	205051	95901.1	20766
0.924567	1000000	831173	550540	376983	205176	95980.8	20785.9
0.925123	1000000	831223	550659	377123	205302	96060.5	20805.8
0.925678	1000000	831273	550778	377263	205428	96140.2	20825.8
0.926234	1000000	831323	550897	377403	205553	96219.8	20845.7
0.926789	1000000	831372	551016	377543	205679	96299.4	20865.6
0.927345	1000000	831422	551135	377683	205804	96379	20885.5
0.9279	1000000	831472	551253	377822	205929	96458.5	20905.3
0.928456	1000000	831522	551372	377962	206054	96538	20925.2
0.929011	1000000	831571	551490	378101	206180	96617.4	20945.1
0.929567	1000000	831621	551609	378241	206305	96696.8	20964.9
0.930123	1000000	831671	551727	378380	206430	96776.2	20984.8
0.930678	1000000	831720	551845	378519	206555	96855.5	21004.6
0.931234	1000000	831769	551963	378658	206679	96934.8	21024.5
0.931789	1000000	831819	552081	378797	206804	97014	21044.3
0.932345	1000000	831868	552199	378935	206929	97093.2	21064.1
0.9329	1000000	831918	552316	379074	207053	97172.4	21083.9
0.933456	1000000	831967	552434	379213	207178	97251.5	21103.7
0.934011	1000000	832016	552552	379351	207302	97330.6	21123.5
0.934567	1000000	832065	552669	379489	207427	97409.6	21143.3
0.935123	1000000	832115	552786	379628	207551	97488.6	21163.1
0.935678	1000000	832164	552904	379766	207675	97567.6	21182.8
0.936234	1000000	832213	553021	379904	207799	97646.5	21202.6
0.936789	1000000	832262	553138	380042	207924	97725.4	21222.3
0.937345	1000000	832311	553255	380179	208048	97804.3	21242.1
0.9379	1000000	832360	553371	380317	208171	97883.1	21261.8
0.938456	1000000	832409	553488	380455	208295	97961.9	21281.5
0.939011	1000000	832457	553605	380592	208419	98040.6	21301.2
0.939567	1000000	832506	553721	380730	208543	98119.3	21320.9
0.940123	1000000	832555	553838	380867	208666	98197.9	21340.6
0.940678	1000000	832604	553954	381004	208790	98276.5	21360.3
0.941234	1000000	832652	554070	381141	208913	98355.1	21380
0.941789	1000000	832701	554187	381278	209037	98433.7	21399.7
0.942345	1000000	832749	554303	381415	209160	98512.1	21419.3
0.9429	1000000	832798	554419	381552	209283	98590.6	21439
0.943456	1000000	832847	554535	381689	209406	98669	21458.6
0.944011	1000000	832895	554650	381825	209530	98747.4	21478.3
0.944567	1000000	832943	554766	381962	209653	98825.7	21497.9
0.945123	1000000	832992	554882	382098	209775	98904	21517.5
0.945678	1000000	833040	554997	382234	209898	98982.3	21537.1
0.946234	1000000	833088	555112	382370	210021	99060.5	21556.7
0.946789	1000000	833137	555228	382506	210144	99138.7	21576.3
0.947345	1000000	833185	555343	382642	210266	99216.8	21595.9
0.9479	1000000	833233	555458	382778	210389	99294.9	21615.5
0.948456	1000000	833281	555573	382914	210511	99373	21635
0.949011	1000000	833329	555688	383050	210634	99451	21654.6
0.949567	1000000	833377	555803	383185	210756	99529	21674.1
0.950123	1000000	833425	555917	383321	210878	99606.9	21693.7
0.950678	1000000	833473	556032	383456	211001	99684.8	21713.2
0.951234	1000000	833521	556147	383591	211123	99762.7	21732.7
0.951789	1000000	833569	556261	383727	211245	99840.5	21752.3
0.952345	1000000	833617	556375	383862	211367	99918.3	21771.8
0.9529	1000000	833664	556490	383997	211489	99996.1	21791.3
0.953456	1000000	833712	556604	384131	211610	100074	21810.7
0.954011	1000000	833760	556718	384266	211732	100151	21830.2
0.954567	1000000	833807	556832	384401	211854	100229	21849.7
0.955123	1000000	833855	556946	384535	211975	100307	21869.2
0.955678	1000000	833902	557059	384670	212097	100384	21888.6
0.956234	1000000	833950	557173	384804	212218	100462	21908.1
0.956789	1000000	833997	557287	384938	212340	100539	21927.5
0.957345	1000000	834045	557400	385072	212461	100617	21946.9
0.9579	1000000	834092	557514	385207	212582	100694	21966.3
0.958456	1000000	834140	557627	385340	212703	100771	21985.7
0.959011	1000000	834187	557740	385474	212824	100849	22005.1
0.959567	1000000	834234	557853	385608	212945	100926	22024.5
0.960123	1000000	834281	557966	385742	213066	101003	22043.9
0.960678	1000000	834328	558079	385875	213187	101080	22063.3
0.961234	1000000	834376	558192	386009	213308	101157	22082.7
0.961789	1000000	834423	558305	386142	213428	101235	22102
0.962345	1000000	834470	558417	386275	213549	101312	22121.4
0.9629	1000000	834517	558530	386408	213669	101389	22140.7
0.963456	1000000	834564	558642	386541	213790	101466	22160
0.964011	1000000	834611	558755	386674	213910	101543	22179.3
0.964567	1000000	834657	558867	386807	214030	101619	22198.7
0.965123	1000000	834704	558979	386940	214151	101696	22218
0.965678	1000000	834751	559091	387073	214271	101773	22237.2
0.966234	1000000	834798	559203	387205	214391	101850	22256.5
0.966789	1000000	834844	559315	387338	214511	101927	22275.8
0.967345	1000000	834891	559427	387470	214631	102003	22295.1
0.9679	1000000	834938	559539	387602	214751	102080	22314.3
0.968456	1000000	834984	559650	387734	214870	102157	22333.6
0.969011	1000000	835031	559762	387866	214990	102233	22352.8
0.969567	1000000	835077	559873	387998	215110	102310	22372
0.970123	1000000	835124	559985	388130	215229	102386	22391.3
0.970678	1000000	835170	560096	388262	215349	102463	22410.5
0.971234	1000000	835217	560207	388394	215468	102539	22429.7
0.971789	1000000	835263	560318	388525	215587	102616	22448.9
0.972345	1000000	835309	560429	388657	215707	102692	22468.1
0.9729	1000000	835356	560540	388788	215826	102768	22487.2
0.973456	1000000	835402	560651	388919	215945	102845	22506.4
0.974011	1000000	835448	560762	389050	216064	102921	22525.6
0.974567	1000000	835494	560872	389182	216183	102997	22544.7
0.975123	1000000	835540	560983	389313	216302	103073	22563.9
0.975678	1000000	835586	561093	389443	216420	103149	22583
0.976234	1000000	835632	561204	389574	216539	103225	22602.1
0.976789	1000000	835678	561314	389705	216658	103301	22621.2
0.977345	1000000	835724	561424	389835	216776	103377	22640.3
0.9779	1000000	835770	561534	389966	216895	103453	22659.4
0.978456	1000000	835816	561644	390096	217013	103529	22678.5
0.979011	1000000	835862	561754	390227	217132	103605	22697.6
0.979567	1000000	835907	561864	390357	217250	103681	22716.7
0.980123	1000000	835953	561974	390487	217368	103757	22735.7
0.980678	1000000	835999	562083	390617	217486	103832	22754.8
0.981234	1000000	836045	562193	390747	217604	103908	22773.8
0.981789	1000000	836090	562302	390877	217722	103984	22792.8
0.982345	1000000	836136	562412	391006	217840	104059	22811.9
0.9829	1000000	836181	562521	391136	217958	104135	22830.9
0.983456	1000000	836227	562630	391265	218076	104210	22849.9
0.984011	1000000	836272	562739	391395	218193	104286	22868.9
0.984567	1000000	836318	562848	391524	218311	104361	22887.9
0.985123	1000000	836363	562957	391653	218429	104437	22906.8
0.985678	1000000	836408	563066	391783	218546	104512	22925.8
0.986234	1000000	836454	563175	391912	218663	104588	22944.8
0.986789	1000000	836499	563283	392041	218781	104663	22963.7
0.987345	1000000	836544	563392	392169	218898	104738	22982.7
0.9879	1000000	836589	563500	392298	219015	104813	23001.6
0.988456	1000000	836634	563609	392427	219132	104888	23020.5
0.989011	1000000	836679	563717	392555	219249	104964	23039.4
0.989567	1000000	836725	563825	392684	219366	105039	23058.3
0.990123	1000000	836770	563933	392812	219483	105114	23077.2
0.990678	1000000	836815	564041	392940	219600	105189	23096.1
0.991234	1000000	836859	564149	393069	219716	105264	23115
0.991789	1000000	836904	564257	393197	219833	105339	23133.8
0.992345	1000000	836949	564365	393325	219950	105414	23152.7
0.9929	1000000	836994	564473	393453	220066	105488	23171.6
0.993456	1000000	837039	564580	393580	220183	105563	23190.4
0.994011	1000000	837084	564688	393708	220299	105638	23209.2
0.994567	1000000	837128	564795	393836	220415	105713	23228
0.995123	1000000	837173	564903	393963	220531	105787	23246.9
0.995678	1000000	837218	565010	394091	220648	105862	23265.7
0.996234	1000000	837262	565117	394218	220764	105937	23284.5
0.996789	1000000	837307	565224	394345	220880	106011	23303.2
0.997345	1000000	837351	565331	394472	220996	106086	23322
0.9979	1000000	837396	565438	394599	221111	106160	23340.8
0.998456	1000000	837440	565545	394726	221227	106235	23359.5
0.999011	1000000	837485	565652	394853	221343	106309	23378.3
0.999567	1000000	837529	565758	394980	221458	106384	23397
1.00012	1000000	837573	565865	395107	221574	106458	23415.8
1.00068	1000000	837617	565971	395233	221689	106532	23434.5
1.00123	1000000	837662	566078	395360	221805	106606	23453.2
1.00179	1000000	837706	566184	395486	221920	106681	23471.9
1.00234	1000000	837750	566290	395612	222035	106755	23490.6
1.0029	1000000	837794	566396	395739	222151	106829	23509.3
1.00346	1000000	837838	566502	395865	222266	106903	23527.9
1.00401	1000000	837882	566608	395991	222381	106977	23546.6
1.00457	1000000	837926	566714	396117	222496	107051	23565.2
1.00512	1000000	837970	566820	396242	222611	107125	23583.9
1.00568	1000000	838014	566926	396368	222725	107199	23602.5
1.00623	1000000	838058	567031	396494	222840	107273	23621.2
1.00679	1000000	838102	567137	396619	222955	107347	23639.8
1.00734	1000000	838146	567242	396745	223069	107421	23658.4
1.0079	1000000	838190	567348	396870	223184	107494	23677
1.00846	1000000	838233	567453	396995	223298	107568	23695.6
1.00901	1000000	838277	567558	397121	223413	107642	23714.2
1.00957	1000000	838321	567663	397246	223527	107715	23732.7
1.01012	1000000	838364	567768	397371	223641	107789	23751.3
1.01068	1000000	838408	567873	397496	223755	107862	23769.8
1.01123	1000000	838452	567978	397620	223869	107936	23788.4
1.01179	1000000	838495	568083	397745	223983	108009	23806.9
1.01234	1000000	838539	568187	397870	224097	108083	23825.4
1.0129	1000000	838582	568292	397994	224211	108156	23844
1.01346	1000000	838625	568397	398119	224325	108230	23862.5
1.01401	1000000	838669	568501	398243	224439	108303	23881
1.01457	1000000	838712	568605	398367	224552	108376	23899.4
1.01512	1000000	838755	568710	398491	224666	108450	23917.9
1.01568	1000000	838799	568814	398615	224779	108523	23936.4
1.01623	1000000	838842	568918	398739	224893	108596	23954.9
1.01679	1000000	838885	569022	398863	225006	108669	23973.3
1.01734	1000000	838928	569126	398987	225120	108742	23991.7
1.0179	1000000	838971	569230	399111	225233	108815	24010.2
1.01846	1000000	839015	569333	399234	225346	108888	24028.6
1.01901	1000000	839058	569437	399358	225459	108961	24047
1.01957	1000000	839101	569541	399481	225572	109034	24065.4
1.02012	1000000	839144	569644	399605	225685	109107	24083.8
1.02068	1000000	839186	569748	399728	225798	109180	24102.2
1.02123	1000000	839229	569851	399851	225911	109252	24120.6
1.02179	1000000	839272	569954	399974	226023	109325	24138.9
1.02234	1000000	839315	570057	400097	226136	109398	24157.3
1.0229	1000000	839358	570160	400220	226248	109471	24175.6
1.02346	1000000	839401	570264	400343	226361	109543	24194
1.02401	1000000	839443	570366	400465	226473	109616	24212.3
1.02457	1000000	839486	570469	400588	226586	109688	24230.6
1.02512	1000000	839529	570572	400711	226698	109761	24248.9
1.02568	1000000	839571	570675	400833	226810	109833	24267.2
1.02623	1000000	839614	570777	400955	226922	109906	24285.5
1.02679	1000000	839656	570880	401078	227034	109978	24303.8
1.02734	1000000	839699	570982	401200	227146	110050	24322.1
1.0279	1000000	839741	571085	401322	227258	110123	24340.3
1.02846	1000000	839784	571187	401444	227370	110195	24358.6
1.02901	1000000	839826	571289	401566	227482	110267	24376.8
1.02957	1000000	839868	571391	401687	227594	110339	24395.1
1.03012	1000000	839911	571493	401809	227705	110412	24413.3
1.03068	1000000	839953	571595	401931	227817	110484	24431.5
1.03123	1000000	839995	571697	402052	227928	110556	24449.7
1.03179	1000000	840037	571799	402174	228040	110628	24467.9
1.03234	1000000	840080	571901	402295	228151	110700	24486.1
1.0329	1000000	840122	572002	402416	228262	110772	24504.3
1.03346	1000000	840164	572104	402537	228373	110844	24522.4
1.03401	1000000	840206	572205	402659	228485	110915	24540.6
1.03457	1000000	840248	572307	402780	228596	110987	24558.7
1.03512	1000000	840290	572408	402900	228707	111059	24576.9
1.03568	1000000	840332	572509	403021	228818	111131	24595
1.03623	1000000	840374	572610	403142	228928	111202	24613.1
1.03679	1000000	840416	572711	403263	229039	111274	24631.2
1.03734	1000000	840458	572812	403383	229150	111346	24649.3
1.0379	1000000	840499	572913	403504	229260	111417	24667.4
1.03846	1000000	840541	573014	403624	229371	111489	24685.5
1.03901	1000000	840583	573115	403744	229482	111560	24703.6
1.03957	1000000	840625	573215	403864	229592	111632	24721.7
1.04012	1000000	840666	573316	403985	229702	111703	24739.7
1.04068	1000000	840708	573416	404105	229813	111775	24757.8
1.04123	1000000	840750	573517	404224	229923	111846	24775.8
1.04179	1000000	840791	573617	404344	230033	111917	24793.8
1.04234	1000000	840833	573718	404464	230143	111988	24811.8
1.0429	1000000	840874	573818	404584	230253	112060	24829.8
1.04346	1000000	840916	573918	404703	230363	112131	24847.8
1.04401	1000000	840957	574018	404823	230473	112202	24865.8
1.04457	1000000	840999	574118	404942	230582	112273	24883.8
1.04512	1000000	841040	574218	405061	230692	112344	24901.8
1.04568	1000000	841081	574317	405181	230802	112415	24919.7
1.04623	1000000	841122	574417	405300	230911	112486	24937.7
1.04679	1000000	841164	574517	405419	231021	112557	24955.6
1.04734	1000000	841205	574616	405538	231130	112628	24973.6
1.0479	1000000	841246	574716	405657	231240	112699	24991.5
1.04846	1000000	841287	574815	405775	231349	112770	25009.4
1.04901	1000000	841328	574914	405894	231458	112840	25027.3
1.04957	1000000	841370	575014	406013	231567	112911	25045.2
1.05012	1000000	841411	575113	406131	231676	112982	25063.1
1.05068	1000000	841452	575212	406250	231785	113052	25080.9
1.05123	1000000	841493	575311	406368	231894	113123	25098.8
1.05179	1000000	841534	575410	406486	232003	113193	25116.7
1.05234	1000000	841574	575509	406604	232112	113264	25134.5
1.0529	1000000	841615	575607	406723	232221	113334	25152.3
1.05346	1000000	841656	575706	406841	232329	113405	25170.2
1.05401	1000000	841697	575805	406958	232438	113475	25188
1.05457	1000000	841738	575903	407076	232546	113546	25205.8
1.05512	1000000	841778	576002	407194	232655	113616	25223.6
1.05568	1000000	841819	576100	407312	232763	113686	25241.4
1.05623	1000000	841860	576198	407429	232871	113757	25259.2
1.05679	1000000	841901	576297	407547	232980	113827	25276.9
1.05734	1000000	841941	576395	407664	233088	113897	25294.7
1.0579	1000000	841982	576493	407781	233196	113967	25312.4
1.05846	1000000	842022	576591	407899	233304	114037	25330.2
1.05901	1000000	842063	576689	408016	233412	114107	25347.9
1.05957	1000000	842103	576786	408133	233520	114177	25365.6
1.06012	1000000	842144	576884	408250	233628	114247	25383.3
1.06068	1000000	842184	576982	408367	233735	114317	25401
1.06123	1000000	842224	577079	408483	233843	114387	25418.7
1.06179	1000000	842265	577177	408600	233951	114457	25436.4
1.06234	1000000	842305	577274	408717	234058	114526	25454.1
1.0629	1000000	842345	577372	408833	234166	114596	25471.8
1.06346	1000000	842386	577469	408950	234273	114666	25489.4
1.06401	1000000	842426	577566	409066	234380	114736	25507.1
1.06457	1000000	842466	577663	409182	234488	114805	25524.7
1.06512	1000000	842506	577760	409299	234595	114875	25542.3
1.06568	1000000	842546	577857	409415	234702	114944	25559.9
1.06623	1000000	842586	577954	409531	234809	115014	25577.5
1.06679	1000000	842626	578051	409647	234916	115083	25595.1
1.06734	1000000	842666	578148	409763	235023	115153	25612.7
1.0679	1000000	842706	578245	409878	235130	115222	25630.3
1.06846	1000000	842746	578341	409994	235236	115292	25647.9
1.06901	1000000	842786	578438	410110	235343	115361	25665.4
1.06957	1000000	842826	578534	410225	235450	115430	25683
1.07012	1000000	842866	578631	410340	235556	115499	25700.5
1.07068	1000000	842906	578727	410456	235663	115569	25718.1
1.07123	1000000	842945	578823	410571	235769	115638	25735.6
1.07179	1000000	842985	578919	410686	235875	115707	25753.1
1.07234	1000000	843025	579015	410801	235982	115776	25770.6
1.0729	1000000	843064	579111	410916	236088	115845	25788.1
1.07346	1000000	843104	579207	411031	236194	115914	25805.6
1.07401	1000000	843144	579303	411146	236300	115983	25823
1.07457	1000000	843183	579399	411261	236406	116052	25840.5
1.07512	1000000	843223	579495	411376	236512	116121	25858
1.07568	1000000	843262	579590	411490	236618	116189	25875.4
1.07623	1000000	843302	579686	411605	236724	116258	25892.8
1.07679	1000000	843341	579781	411719	236829	116327	25910.3
1.07734	1000000	843381	579877	411833	236935	116396	25927.7
1.0779	1000000	843420	579972	411948	237041	116464	25945.1
1.07846	1000000	843459	580067	412062	237146	116533	25962.5
1.07901	1000000	843499	580162	412176	237252	116602	25979.9
1.07957	1000000	843538	580257	412290	237357	116670	25997.3
1.08012	1000000	843577	580352	412404	237462	116739	26014.6
1.08068	1000000	843616	580447	412518	237568	116807	26032
1.08123	1000000	843656	580542	412631	237673	116875	26049.3
1.08179	1000000	843695	580637	412745	237778	116944	26066.7
1.08234	1000000	843734	580732	412859	237883	117012	26084
1.0829	1000000	843773	580826	412972	237988	117080	26101.3
1.08346	1000000	843812	580921	413086	238093	117149	26118.6
1.08401	1000000	843851	581016	413199	238198	117217	26135.9
1.08457	1000000	843890	581110	413312	238302	117285	26153.2
1.08512	1000000	843929	581204	413425	238407	117353	26170.5
1.08568	1000000	843968	581299	413538	238512	117421	26187.8
1.08623	1000000	844007	581393	413651	238616	117489	26205.1
1.08679	1000000	844046	581487	413764	238721	117557	26222.3
1.08734	1000000	844085	581581	413877	238825	117625	26239.5
1.0879	1000000	844123	581675	413990	238929	117693	26256.8
1.08846	1000000	844162	581769	414103	239034	117761	26274
1.08901	1000000	844201	581863	414215	239138	117829	26291.2
1.08957	1000000	844240	581956	414328	239242	117897	26308.4
1.09012	1000000	844278	582050	414440	239346	117965	26325.6
1.09068	1000000	844317	582144	414552	239450	118032	26342.8
1.09123	1000000	844356	582237	414665	239554	118100	26360
1.09179	1000000	844394	582331	414777	239658	118168	26377.2
1.09234	1000000	844433	582424	414889	239762	118235	26394.3
1.0929	1000000	844471	582518	415001	239865	118303	26411.5
1.09346	1000000	844510	582611	415113	239969	118371	26428.6
1.09401	1000000	844548	582704	415225	240073	118438	26445.7
1.09457	1000000	844586	582797	415337	240176	118506	26462.9
1.09512	1000000	844625	582890	415448	240280	118573	26480
1.09568	1000000	844663	582983	415560	240383	118640	26497.1
1.09623	1000000	844702	583076	415671	240486	118708	26514.2
1.09679	1000000	844740	583169	415783	240590	118775	26531.2
1.09734	1000000	844778	583262	415894	240693	118842	26548.3
1.0979	1000000	844816	583354	416005	240796	118909	26565.4
1.09846	1000000	844855	583447	416117	240899	118977	26582.4
1.09901	1000000	844893	583539	416228	241002	119044	26599.5
1.09957	1000000	844931	583632	416339	241105	119111	26616.5
1.10012	1000000	844969	583724	416450	241208	119178	26633.5
1.10068	1000000	845007	583817	416561	241311	119245	26650.5
1.10123	1000000	845045	583909	416671	241413	119312	26667.5
1.10179	1000000	845083	584001	416782	241516	119379	26684.5
1.10234	1000000	845121	584093	416893	241619	119446	26701.5
1.1029	1000000	845159	584185	417003	241721	119513	26718.5
1.10346	1000000	845197	584277	417114	241824	119579	26735.5
1.10401	1000000	845235	584369	417224	241926	119646	26752.4
1.10457	1000000	845273	584461	417335	242028	119713	26769.4
1.10512	1000000	845311	584553	417445	242131	119780	26786.3
1.10568	1000000	845348	584644	417555	242233	119846	26803.2
1.10623	1000000	845386	584736	417665	242335	119913	26820.2
1.10679	1000000	845424	584827	417775	242437	119980	26837.1
1.10734	1000000	845462	584919	417885	242539	120046	26854
1.1079	1000000	845499	585010	417995	242641	120113	26870.9
1.10846	1000000	845537	585102	418104	242743	120179	26887.7
1.10901	1000000	845574	585193	418214	242844	120245	26904.6
1.10957	1000000	845612	585284	418324	242946	120312	26921.5
1.11012	1000000	845650	585375	418433	243048	120378	26938.3
[truncated: 78,001 more rows]
