# Supplementary material for: Seepage Deformation and Failure of Rock Mass Under High Water Pressure With a Discrete Element Method
Source: Frontiers journal article supplement (doi:10.3389/fphy.2022.857158), 2022-04-12
Supplement: Table_3.XLSX [file Table_3.XLSX]

## Sheet: Sheet1
	A	B	C	D	E	F	G
0.5	1000000	872598	617151	430813	260437	168230	115792
1	2000000	1745200	1234300	861626	520874	336461	231584
1.5	3000000	2617790	1851450	1292440	781311	504691	347376
2	4000000	3492980	2475910	1732980	1052340	683202	472899
2.5	5000000	4362990	3085760	2154070	1302180	841152	578960
